# Supplementary material for: Efficient visible light-mediated cross-dehydrogenative coupling reactions of tertiary amines catalyzed by a polymer-immobilized iridium-based photocatalyst
Source: Royal Society of Chemistry journal article supplement (doi:10.1039/c4gc00058g), 2014-01-01
Supplement: c4gc00058g1.pdf [file c4gc00058g1.pdf]

## Supporting Information

### *Efficient Visible Light-Mediated Cross-Dehydrogenative Coupling Reactions of Tertiary Amines Catalyzed by a Polymer-Immobilized Iridium-Based Photocatalyst*

*Woo-Jin Yoo, and Shū Kobayashi\**

Department of Chemistry, School of Science, The University of Tokyo, 7-3-1, Hongo, Bunkyo-ku,  
Tokyo, 113-0033, Japan

## Contents

|           |                                                                                                               |      |
|-----------|---------------------------------------------------------------------------------------------------------------|------|
| Part I:   | Preparation of the Polymer-Supported Iridium Photocatalyst.....                                               | S-2  |
| Part II:  | Substrate Scope for the CDC Reaction of <i>N</i> -Aryl Tetrahydroisoquinolines with P-H<br>Nucleophiles ..... | S-4  |
| Part II:  | NMR Spectra of <b>6a-n</b> .....                                                                              | S-10 |
| Part III: | References .....                                                                                              | S-54 |

**General Information:**  $^1\text{H}$  and  $^{13}\text{C}$  NMR spectra were recorded on a JEOL ECX-400 in  $\text{CDCl}_3$ . Chemical shifts were reported in parts per million (ppm) from tetramethylsilane using the solvent resonance as the internal standard (chloroform:  $\delta$  7.26 ppm) for  $^1\text{H}$  NMR and (deuteriochloroform:  $\delta$  77.0 ppm) for  $^{13}\text{C}$  NMR.  $^{31}\text{P}$  NMR spectra were referenced to external  $\text{H}_3\text{PO}_4$  ( $\delta$  0 ppm).  $^{19}\text{F}$  NMR spectra were referenced to external benzotrifluoride ( $\delta$  -63.7 ppm). IR spectra were measured on a JASCO FT/IR-610 spectrometer. High-resolution mass spectrometry was carried out using a JEOL JMS-T100TD (ESI). Preparative thin-layer chromatography (PTLC) was carried out using Wakogel B-5F from Wako Pure Chemical Industries, Ltd.

**Reagents:** Unless stated otherwise, commercial reagents were used as received. 2-(4-vinylphenyl)pyridine,<sup>1</sup> *N*-aryl tetrahydroisoquinolines **4a-e**,<sup>2</sup> and secondary phosphine oxides **5f-k**<sup>3</sup> were prepared according to known literature procedures.

### Part I: Preparation of the Polymer-Supported Iridium Photocatalyst

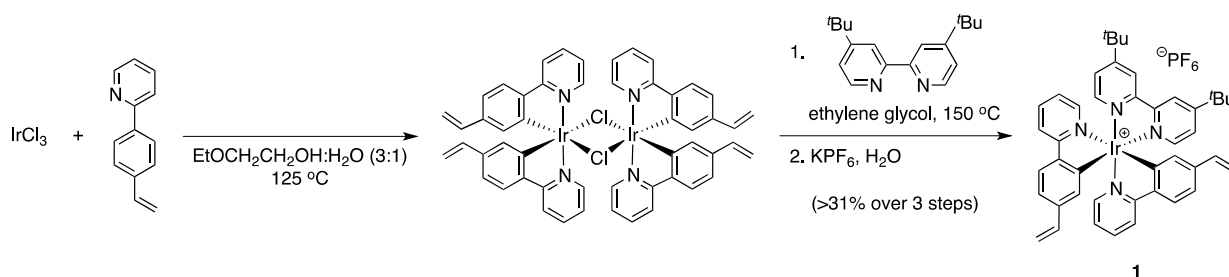

**[Ir(vppy)<sub>2</sub>Cl]<sub>2</sub>.** In a 50 mL round-bottom flask,  $\text{IrCl}_3$  (0.2470 g, 0.8273 mmol) and 2-(4-vinylphenyl)pyridine (0.5738 g, 3.166 mmol) was dissolved in a solvent mixture of 2-ethoxyethanol (19 mL) and water (6.4 mL). The reaction vessel was fitted with a reflux condenser, flushed with argon gas, and placed in an oil bath set at 125 °C for 16 hours. The reaction mixture was allowed to cool to room temperature, filtered, and washed with  $\text{H}_2\text{O}$ , EtOH, and hexane. The yellow solid was allowed to dry under light vacuum and this crude product (403.6 mg, 0.3425 mmol, <41%) was used directly for the next procedure.

**$[\text{Ir}(\text{vppy})_2(\text{dtbbpy})]\text{PF}_6$  (**1**).** In a 30 mL round-bottom flask was added  $[\text{Ir}(\text{vppy})_2\text{Cl}]_2$  (0.4036 g, 0.3425 mmol), 4,4'-di-*tert*-butyl-2,2'-bipyridine (0.2023 g, 0.7537 mmol), and ethylene glycol (17 mL). The reaction flask was fitted with a reflux condenser, flushed with argon gas, and heated to 150 °C for 16 hours. The reaction mixture was allowed to cool to room temperature and then was poured into a  $\text{KPF}_6$  solution (1.261 g in 170 mL of water). The resulting precipitate was filtered and then was purified by column chromatography (basic  $\text{Al}_2\text{O}_3$ , MeCN) to provide a bright yellow gel. The resulting gel was re-dissolved in a minimal amount of acetone, and then was precipitated in  $\text{Et}_2\text{O}$  to provide a bright yellow solid (0.2530 g, 0.2619 mmol, <76%). This crude solid was used directly for the suspension polymerization reaction.

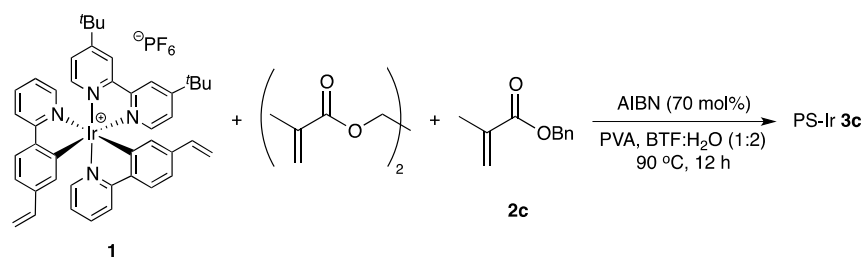

**PS-Ir (3c).** In a 10 mL test tube was added the crude Ir-based monomer **1** (0.0400 g, 0.0414 mmol), ethylene glycol dimethacrylate (24  $\mu$ L, 0.13 mmol), benzyl methacrylate (**2c**) (400  $\mu$ L, 2.35 mmol), azobisisobutyronitrile (AIBN) (0.0048 g, 0.0210 mmol), polyvinyl alcohol (0.0048 g), benzotrifluoride (BTF) (0.4 mL), and water (0.8 mL). The reaction vessel was degassed and was allowed to stir at 90 °C for 12 hours under an atmosphere of argon. The resulting solid was filtered and washed successively with water, MeOH, and DCM. The light orange cross-linked polymer was then lightly grounded with a mortar and pestle to give a bright yellow solid. The yellow polymer was washed with DCM and dried under high vacuum to provide **3c** (448.5 mg).

The iridium content of **3c** was determined using the following procedure: In a test tube containing 14.2 mg of **3c** was added conc.  $\text{H}_2\text{SO}_4$  (1 mL) and then was heated to 200 °C for 1 hour in a heating block. Then conc.  $\text{HNO}_3$  was added dropwise until the black solution turned into a light transparent yellow solution. After being heated for an additional 1 hour at 200 °C, the acidic solution was allowed to cool to room temperature. Then, 1 mL of aqua regia was added and then the solution was diluted to 50 mL with de-ionized using a volumetric flask. ICP analysis of the acid digested polymer **3c** was performed and the Ir content was determined using a calibration curve (2.85291 ppm Ir, 0.0523 mmol/g, expected Ir loading: 0.0851 mmol/g).

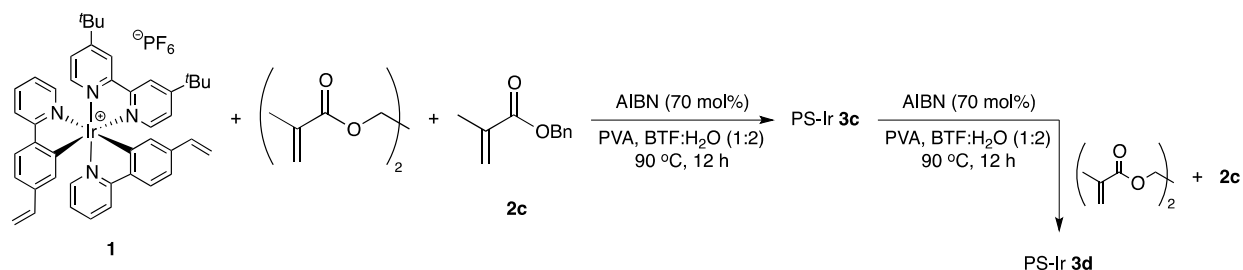

**PS-Ir (3d).** In a 50 mL round-bottom was added the crude Ir-based monomer **1** (0.3706 g, 0.3836 mmol), ethylene glycol dimethacrylate (235  $\mu$ L, 1.246 mmol), benzyl methacrylate (**2c**) (3.8 mL, 22 mmol), azobisisobutyronitrile (AIBN) (0.0441 g, 0.2686 mmol), polyvinyl alcohol (0.0441 g), benzotrifluoride (BTF) (3.8 mL), and water (7.6 mL). The reaction vessel was degassed and was allowed to stir at 90 °C for 12 hours under an atmosphere of argon. The resulting solid was filtered and washed successively with water, MeOH, and DCM. The light orange cross-linked polymer was then lightly grounded with a mortar and pestle to give a bright yellow solid. The yellow polymer was washed with DCM and dried under high vacuum at 90 °C to provide PS-Ir **3c** (4.381 g). The dried yellow solid was then transferred to a 50 mL round-bottom flask and the above procedure was repeated to provide the double-coated cross-linked polymer **3d** (8.4226 g, 0.0255 mmol/g, expected Ir loading: 0.0437 mmol/g).

## Part II: Substrate Scope for the CDC Reaction of *N*-Aryl Tetrahydroisoquinolines with P-H Nucleophiles

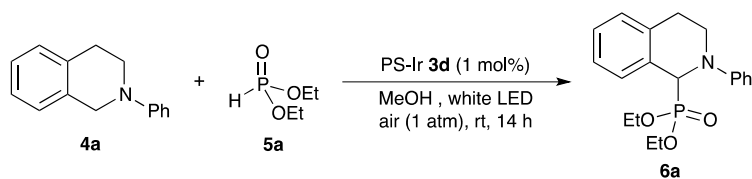

In a 2-necked test-tube was added PS-Ir **3d** (0.1996 g, 0.0255 mmol/g, 0.005 mmol, 1 mol%) and *N*-aryl tetrahydroisoquinoline **4a** (0.1046 g, 0.500 mmol). The reaction vessel was dried under high vacuum, and then re-pressurized with dry air. Then dialkyl phosphite **5a** (65  $\mu$ L, 0.5046 mmol) and MeOH (1.6 mL) was added and the reaction mixture was allowed to stir for 14 h under a white LED lamp (Toshiba E-CORE LDA7N/2). Next, the heterogeneous Ir catalyst **3d** was filtered and washed with MeOH. The filtrate was concentrated under reduced pressure, and the crude product was purified by preparative TLC (1:1 EtOAc:hexane) to afford the desired  $\alpha$ -amino phosphonate **6a** (0.1499 g, 0.4340 mmol, 87%) as a white solid.

**Diethyl (2-phenyl-1,2,3,4-tetrahydroisoquinolin-1-yl)phosphonate (6a)** (Table 2, entry 1).  $^1\text{H}$  NMR ( $\text{CDCl}_3$ , 400 MHz)  $\delta$  7.38-7.37 (m, 1H), 7.26-7.13 (m, 5H), 6.97 (d, 2H,  $J = 8.3$  Hz), 6.78 (t, 1H,  $J = 7.4$  Hz), 5.19 (d, 1H,  $J = 20.2$  Hz), 4.11-3.86 (m, 5H), 3.65-3.59 (m, 1H), 3.10-2.98 (m, 2H), 1.24 (t, 3H,  $J = 6.9$  Hz), 1.13 (t, 3H,  $J = 6.8$  Hz);  $^{13}\text{C}$  NMR ( $\text{CDCl}_3$ , 100 MHz)  $\delta$  149.3 (d,  $J_{\text{C-P}} = 5.7$  Hz), 136.3 (d,  $J_{\text{C-P}} = 5.7$  Hz), 130.6, 129.0, 128.6 (d,  $J_{\text{C-P}} = 2.9$  Hz), 128.0 (d,  $J_{\text{C-P}} = 4.8$  Hz), 127.3 (d,  $J_{\text{C-P}} = 3.8$  Hz), 125.8 (d,  $J_{\text{C-P}} = 2.9$  Hz), 118.4, 114.7, 63.2 (d,  $J_{\text{C-P}} = 7.6$  Hz), 62.2 (d,  $J_{\text{C-P}} = 7.6$  Hz), 58.7 (d,  $J_{\text{C-P}} = 160.2$  Hz), 43.4, 26.7;  $^{31}\text{P}$  NMR ( $\text{CDCl}_3$ , 160 MHz)  $\delta$  23.3. This is a known compound and the spectral data are identical to those reported in the literature.<sup>4</sup>

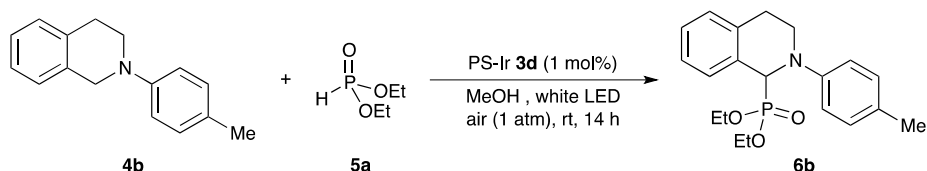

**Diethyl (2-(*p*-tolyl)-1,2,3,4-tetrahydroisoquinolin-1-yl)phosphonate (6b)** (Table 2, entry 2). Following the above general procedure with **4b** (111.7 mg, 0.500 mmol) and **5a** (65  $\mu$ L, 0.505 mmol) for 14 h. The crude reaction mixture was purified by preparative TLC (1:1 EtOAc:hexane) to provide **6b** (0.1736 g, 0.483 mmol, 97%) as a white solid.  $^1\text{H}$  NMR ( $\text{CDCl}_3$ , 400 MHz)  $\delta$  7.17-7.10 (m, 3H), 7.03 (d, 2H,  $J = 8.3$  Hz), 6.87 (d, 2H,  $J = 8.2$  Hz), 5.11 (d, 1H,  $J = 20.6$  Hz), 4.16-3.86 (m, 5H), 3.60-3.56 (m, 1H), 2.98-2.97 (m, 2H), 2.24 (s, 3H), 1.24 (t, 3H,  $J = 6.9$  Hz), 1.16 (t, 3H,  $J = 6.9$  Hz);  $^{13}\text{C}$  NMR ( $\text{CDCl}_3$ , 100 MHz)  $\delta$  147.4, 136.4 (d,  $J_{\text{C-P}} = 5.7$  Hz), 130.6, 129.6, 128.8 (d,  $J_{\text{C-P}} = 1.9$  Hz), 128.1, 127.9, 127.3 (d,  $J_{\text{C-P}} = 3.8$  Hz), 125.7 (d,  $J_{\text{C-P}} = 2.9$  Hz), 115.3, 63.3 (d,  $J_{\text{C-P}} = 6.7$  Hz), 62.2 (d,  $J_{\text{C-P}} = 7.6$  Hz), 59.0 (d,  $J_{\text{C-P}} = 157.3$  Hz), 43.8, 26.4, 20.2, 16.4 (d,  $J_{\text{C-P}} = 5.7$  Hz), 16.3 (d,  $J_{\text{C-P}} = 5.7$  Hz);  $^{31}\text{P}$  NMR ( $\text{CDCl}_3$ , 160 MHz)  $\delta$  22.9. This is a known compound and the spectral data are identical to those reported in the literature.<sup>5</sup>



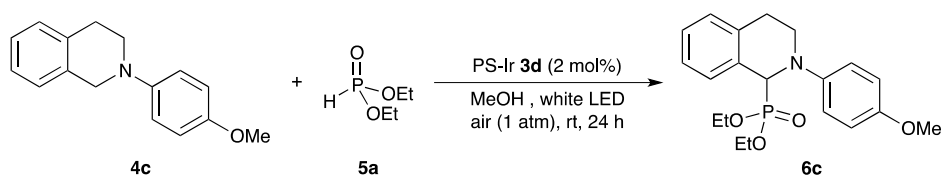

**Diethyl (2-(4-methoxyphenyl)-1,2,3,4-tetrahydroisoquinolin-1-yl)phosphonate (6c) (Table 2, entry 3).** Following the above general procedure with **4c** (119.7 mg, 0.500 mmol), **5a** (65  $\mu$ L, 0.505 mmol), and heterogeneous catalyst **3d** (0.3992 g, 0.0255 mmol/g, 0.010 mmol, 2 mol%) for 24 h. The crude reaction mixture was purified by preparative TLC (1:1 EtOAc:hexane) to provide **6c** (0.1641 g, 0.437 mmol, 87%) as a white solid.  $^1\text{H}$  NMR ( $\text{CDCl}_3$ , 400 MHz)  $\delta$  7.38-7.36 (m, 1H), 7.17-7.10 (m, 3H), 6.90 (d, 2H,  $J = 8.7$  Hz), 6.79 (d, 2H,  $J = 8.7$  Hz), 5.00 (d, 1H,  $J = 21.5$  Hz), 4.13-3.87 (m, 5H), 3.72 (s, 3H), 3.53-3.49 (m, 1H), 2.91-2.93 (m, 2H), 1.23 (t, 3H,  $J = 7.3$  Hz), 1.14 (t, 3H,  $J = 7.3$  Hz);  $^{13}\text{C}$  NMR ( $\text{CDCl}_3$ , 100 MHz)  $\delta$  153.1, 144.2, 136.4 (d,  $J_{\text{C-P}} = 5.7$  Hz), 130.5, 128.9 (d,  $J_{\text{C-P}} = 2.9$  Hz), 128.1 (d,  $J_{\text{C-P}} = 4.8$  Hz), 127.2 (d,  $J_{\text{C-P}} = 2.9$  Hz), 125.8 (d,  $J_{\text{C-P}} = 2.9$  Hz), 117.6, 114.5, 63.3 (d,  $J_{\text{C-P}} = 6.7$  Hz), 62.2 (d,  $J_{\text{C-P}} = 7.6$  Hz), 59.4 (d,  $J_{\text{C-P}} = 157.2$  Hz), 55.6, 44.6, 26.1, 16.4 (d,  $J_{\text{C-P}} = 5.7$  Hz), 16.3 (d,  $J_{\text{C-P}} = 5.7$  Hz);  $^{31}\text{P}$  NMR ( $\text{CDCl}_3$ , 160 MHz)  $\delta$  22.8. This is a known compound and the spectral data are identical to those reported in the literature.<sup>4</sup>

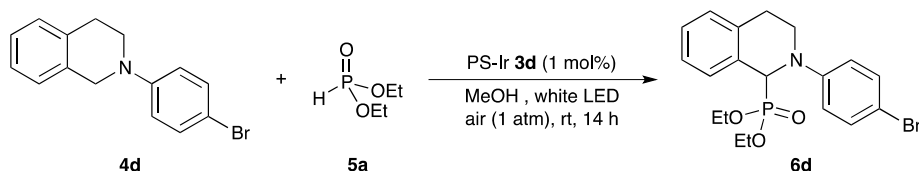

**Diethyl (2-(4-bromophenyl)-1,2,3,4-tetrahydroisoquinolin-1-yl)phosphonate (6d) (Table 2, entry 4).** Following the above general procedure with **4d** (144.1 mg, 0.500 mmol) and **5a** (65  $\mu$ L, 0.505 mmol) for 14 h. The crude reaction mixture was purified by preparative TLC (1:1 EtOAc:hexane) to provide **6d** (0.0827 g, 0.1949 mmol, 39%) as a white solid.  $^1\text{H}$  NMR ( $\text{CDCl}_3$ , 400 MHz)  $\delta$  7.34-7.29 (m, 3H), 7.21-7.13 (m, 3H), 6.84-6.81 (m, 2H), 5.08 (d, 1H,  $J = 19.3$  Hz), 4.08-3.81 (m, 5H), 3.54-3.49 (m, 1H), 3.15-3.11 (m, 1H), 2.98-2.93 (m, 1H), 1.21 (t, 3H,  $J = 7.3$  Hz), 1.19 (t, 3H,  $J = 7.3$  Hz);  $^{13}\text{C}$  NMR ( $\text{CDCl}_3$ , 100 MHz)  $\delta$  148.3 (d,  $J_{\text{C-P}} = 4.8$  Hz), 136.3, 131.7, 130.4, 128.6 (d,  $J_{\text{C-P}} = 2.9$  Hz), 128.1 (d,  $J_{\text{C-P}} = 4.8$  Hz), 127.6 (d,  $J_{\text{C-P}} = 2.9$  Hz), 126.0 (d,  $J_{\text{C-P}} = 2.9$  Hz), 116.1, 110.3, 63.2 (d,  $J_{\text{C-P}} = 7.6$  Hz), 62.4 (d,  $J_{\text{C-P}} = 7.6$  Hz), 58.7 (d,  $J_{\text{C-P}} = 158.3$  Hz), 43.6, 26.9, 16.4 (d,  $J_{\text{C-P}} = 5.7$  Hz), 16.3 (d,  $J_{\text{C-P}} = 3.7$  Hz);  $^{31}\text{P}$  NMR ( $\text{CDCl}_3$ , 160 MHz)  $\delta$  22.4. This is a known compound and the spectral data are identical to those reported in the literature.<sup>6</sup>

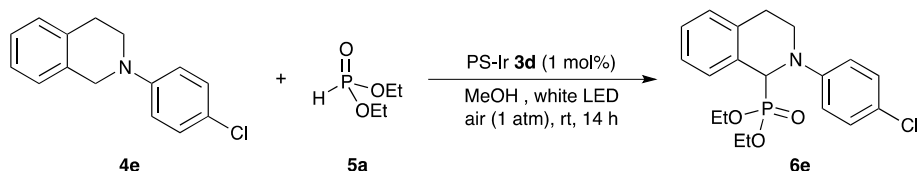

**Diethyl (2-(4-chlorophenyl)-1,2,3,4-tetrahydroisoquinolin-1-yl)phosphonate (6e) (Table 2, entry 5).** Following the above general procedure with **4e** (121.9 mg, 0.500 mmol) and **5a** (65  $\mu$ L, 0.505 mmol) for 14 h. The crude reaction mixture was purified by preparative TLC (1:1 EtOAc:hexane) to provide **6e** (0.0889 g, 0.2341 mmol, 47%) as a white solid.  $^1\text{H}$  NMR ( $\text{CDCl}_3$ , 400 MHz)  $\delta$  7.35-7.33 (m, 1H), 7.21-7.13 (m, 5H), 6.88-6.86 (m, 2H), 5.09 (d, 1H,  $J = 19.2$  Hz),

4.10-3.81 (m, 5H), 3.55-3.49 (m, 1H), 3.14-3.10 (m, 1H), 2.98-2.93 (m, 1H), 1.21 (t, 3H,  $J = 7.3$  Hz), 1.12 (t, 3H,  $J = 6.9$  Hz);  $^{13}\text{C}$  NMR ( $\text{CDCl}_3$ , 100 MHz)  $\delta$  147.9 (d,  $J_{\text{C-P}} = 4.8$  Hz), 136.2 (d,  $J_{\text{C-P}} = 5.7$  Hz), 130.4, 128.6 (d,  $J_{\text{C-P}} = 2.9$  Hz), 128.1 (d,  $J_{\text{C-P}} = 4.8$  Hz), 127.6 (d,  $J_{\text{C-P}} = 3.8$  Hz), 126.0 (d,  $J_{\text{C-P}} = 2.9$  Hz), 123.1, 115.7, 63.2 (d,  $J_{\text{C-P}} = 6.7$  Hz), 62.4 (d,  $J_{\text{C-P}} = 7.6$  Hz), 58.8 (d,  $J_{\text{C-P}} = 160.2$  Hz), 43.7, 26.9, 16.4 (d,  $J_{\text{C-P}} = 4.8$  Hz), 16.3 (d,  $J_{\text{C-P}} = 5.7$  Hz);  $^{31}\text{P}$  NMR ( $\text{CDCl}_3$ , 160 MHz)  $\delta$  22.5. This is a known compound and the spectral data are identical to those reported in the literature.<sup>5</sup>

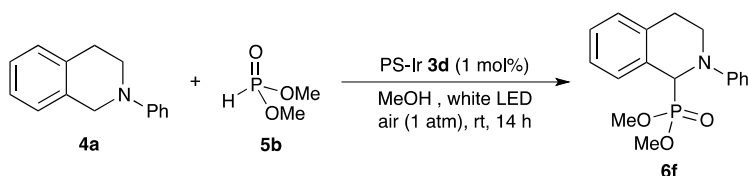

**Dimethyl (2-phenyl-1,2,3,4-tetrahydroisoquinolin-1-yl)phosphonate (6f) (Table 2, entry 6).**

Following the above general procedure with **4a** (104.6 mg, 0.500 mmol) and **5b** (46  $\mu\text{L}$ , 0.502 mmol) for 14 h. The crude reaction mixture was purified by preparative TLC (1:1 EtOAc:hexane) to provide **6f** (0.1511 g, 0.4762 mmol, 95%) as a white solid.  $^1\text{H}$  NMR ( $\text{CDCl}_3$ , 400 MHz)  $\delta$  7.28-7.26 (m, 1H), 7.19-7.06 (m, 5H), 6.89 (d, 2H,  $J = 8.7$  Hz), 6.72 (t, 1H,  $J = 7.3$  Hz), 5.12 (d, 1H,  $J = 19.7$  Hz), 3.96-3.90 (m, 1H), 3.58-3.54 (m, 7H), 3.02-2.87 (m, 2H);  $^{13}\text{C}$  NMR ( $\text{CDCl}_3$ , 100 MHz)  $\delta$  149.2 (d,  $J_{\text{C-P}} = 6.7$  Hz), 136.3 (d,  $J_{\text{C-P}} = 4.8$  Hz), 130.4, 129.2, 128.8 (d,  $J_{\text{C-P}} = 1.9$  Hz), 127.9 (d,  $J_{\text{C-P}} = 4.8$  Hz), 127.5 (d,  $J_{\text{C-P}} = 3.8$  Hz), 126.0 (d,  $J_{\text{C-P}} = 2.9$  Hz), 118.6, 114.7, 58.7 (d,  $J_{\text{C-P}} = 158.3$  Hz), 53.9 (d,  $J_{\text{C-P}} = 1.9$  Hz), 53.8 (d,  $J_{\text{C-P}} = 1.9$  Hz), 43.5, 26.6;  $^{31}\text{P}$  NMR ( $\text{CDCl}_3$ , 160 MHz)  $\delta$  25.0. This is a known compound and the spectral data are identical to those reported in the literature.<sup>4</sup>

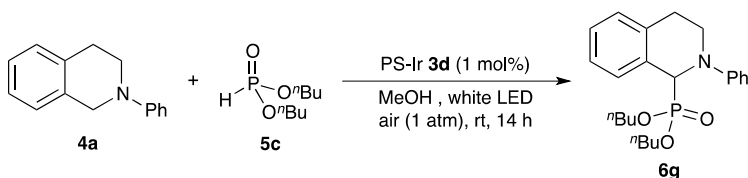

**Dibutyl (2-phenyl-1,2,3,4-tetrahydroisoquinolin-1-yl)phosphonate (6g) (Table 2, entry 7).**

Following the above general procedure with **4a** (104.6 mg, 0.500 mmol) and **5c** (98  $\mu\text{L}$ , 0.502 mmol) for 14 h. The crude reaction mixture was purified by preparative TLC (1:1 EtOAc:hexane) to provide **6g** (0.1766 g, 0.4399 mmol, 88%) as a white solid.  $^1\text{H}$  NMR ( $\text{CDCl}_3$ , 400 MHz)  $\delta$  7.39-7.37 (m, 1H), 7.26-7.13 (m, 5H), 6.97 (d, 2H,  $J = 8.2$  Hz), 6.78 (t, 1H,  $J = 7.3$  Hz), 5.20 (d, 1H,  $J = 19.7$  Hz), 4.06-3.76 (m, 5H), 3.66-3.60 (m, 1H), 3.15-2.97 (m, 2H), 1.60-1.51 (m, 2H), 1.49-1.42 (m, 2H), 1.38-1.20 (m, 4H), 0.88 (t, 3H,  $J = 7.3$  Hz), 0.82 (t, 3H,  $J = 7.3$  Hz);  $^{13}\text{C}$  NMR ( $\text{CDCl}_3$ , 100 MHz)  $\delta$  149.3, 136.4, 130.7, 129.0, 128.7 (d,  $J_{\text{C-P}} = 1.9$  Hz), 128.1 (d,  $J_{\text{C-P}} = 4.8$  Hz), 127.3 (d,  $J_{\text{C-P}} = 2.9$  Hz), 125.8 (d,  $J_{\text{C-P}} = 2.9$  Hz), 118.3, 114.7, 66.8 (d,  $J_{\text{C-P}} = 7.6$  Hz), 65.9 (d,  $J_{\text{C-P}} = 7.6$  Hz), 58.7 (d,  $J_{\text{C-P}} = 157.3$  Hz), 43.4, 32.5 (d,  $J_{\text{C-P}} = 5.7$  Hz), 32.4, 26.8, 18.6 (d,  $J_{\text{C-P}} = 6.7$  Hz), 13.5 (d,  $J_{\text{C-P}} = 4.8$  Hz);  $^{31}\text{P}$  NMR ( $\text{CDCl}_3$ , 160 MHz)  $\delta$  23.0. This is a known compound and the spectral data are identical to those reported in the literature.<sup>6</sup>

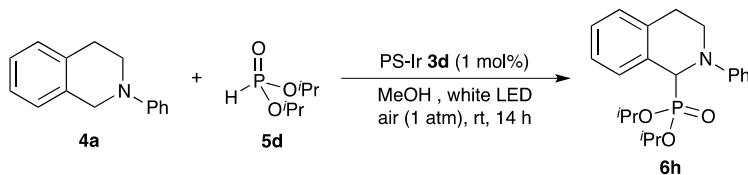

**Diisopropyl (2-phenyl-1,2,3,4-tetrahydroisoquinolin-1-yl)phosphonate (6h) (Table 2, entry 8).**

Following the above general procedure with **4a** (104.6 mg, 0.500 mmol) and **5d** (84  $\mu$ L, 0.504 mmol) for 14 h. The crude reaction mixture was purified by preparative TLC (1:1 EtOAc:hexane) to provide **6h** (0.1260 g, 0.3374 mmol, 67%) as a white solid.  $^1\text{H}$  NMR ( $\text{CDCl}_3$ , 400 MHz)  $\delta$  7.43-7.41 (m, 1H), 7.27-7.13 (m, 5H), 6.97 (d, 2H,  $J = 8.2$  Hz), 6.78 (t, 1H,  $J = 7.3$  Hz), 5.16 (d, 1H,  $J = 21.1$  Hz), 4.68-4.60 (m, 2H), 4.10-4.03 (m, 1H), 3.76-3.64 (m, 1H), 3.07-2.96 (m, 2H), 1.31 (t, 6H,  $J = 6.9$  Hz), 1.18 (d, 3H,  $J = 6.0$  Hz), 0.97 (d, 3H,  $J = 6.4$  Hz);  $^{13}\text{C}$  NMR ( $\text{CDCl}_3$ , 100 MHz)  $\delta$  149.5 (d,  $J_{\text{C-P}} = 6.7$  Hz), 136.4 (d,  $J_{\text{C-P}} = 5.7$  Hz), 130.9, 128.9, 128.6 (d,  $J_{\text{C-P}} = 2.9$  Hz), 128.4 (d,  $J_{\text{C-P}} = 4.8$  Hz), 127.2 (d,  $J_{\text{C-P}} = 2.9$  Hz), 125.6 (d,  $J_{\text{C-P}} = 2.9$  Hz), 118.2, 115.0, 72.1 (d,  $J_{\text{C-P}} = 7.6$  Hz), 70.8 (d,  $J_{\text{C-P}} = 8.6$  Hz), 58.7 (d,  $J_{\text{C-P}} = 159.2$  Hz), 43.4, 26.5, 24.5 (d,  $J_{\text{C-P}} = 2.9$  Hz), 24.1 (d,  $J_{\text{C-P}} = 3.8$  Hz), 23.7 (d,  $J_{\text{C-P}} = 4.8$  Hz), 23.3 (d,  $J_{\text{C-P}} = 5.7$  Hz);  $^{31}\text{P}$  NMR ( $\text{CDCl}_3$ , 160 MHz)  $\delta$  21.5. This is a known compound and the spectral data are identical to those reported in the literature.<sup>6</sup>

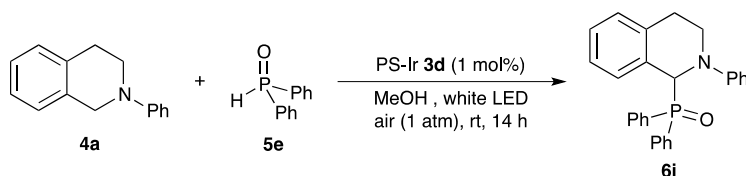**Diphenyl (2-phenyl-1,2,3,4-tetrahydroisoquinolin-1-yl)phosphine oxide (6i) (Table 2, entry 9).**

Following the above general procedure with **4a** (104.6 mg, 0.500 mmol) and **5e** (101.1 mg, 0.500 mmol) for 14 h. The crude reaction mixture was purified by preparative TLC (1:49 MeOH: $\text{CH}_2\text{Cl}_2$ ) to provide **6i** (0.1874 g, 0.4577 mmol, 92%) as a white solid.  $^1\text{H}$  NMR ( $\text{CDCl}_3$ , 400 MHz)  $\delta$  7.83-7.67 (m, 4H), 7.53-7.29 (m, 6H), 7.14-7.05 (m, 4H), 6.92 (t, 1H,  $J = 7.4$  Hz), 6.80-6.74 (m, 3H), 6.64 (d, 1H,  $J = 7.8$  Hz), 5.56 (d, 1H,  $J = 10.5$  Hz), 4.06-3.99 (m, 1H), 3.59-3.53 (m, 1H), 2.85-2.78 (m, 1H), 2.69-2.64 (m, 1H);  $^{13}\text{C}$  NMR ( $\text{CDCl}_3$ , 100 MHz)  $\delta$  149.9, 136.8, 132.6, 132.1 (d,  $J_{\text{C-P}} = 7.6$  Hz), 131.8 (d,  $J_{\text{C-P}} = 2.9$  Hz), 131.7 (d,  $J_{\text{C-P}} = 6.7$  Hz), 131.6 (d,  $J_{\text{C-P}} = 4.8$  Hz), 130.8, 129.8, 129.1 (d,  $J_{\text{C-P}} = 1.9$  Hz), 129.0, 128.4, 128.3 (d,  $J_{\text{C-P}} = 5.7$  Hz), 128.1, 127.7 (d,  $J_{\text{C-P}} = 2.9$  Hz), 127.3 (d,  $J_{\text{C-P}} = 2.9$  Hz), 125.4 (d,  $J_{\text{C-P}} = 2.9$  Hz), 119.5, 116.7, 61.9 (d,  $J_{\text{C-P}} = 79.1$  Hz), 45.1, 25.5;  $^{31}\text{P}$  NMR ( $\text{CDCl}_3$ , 160 MHz)  $\delta$  31.4. This is a known compound and the spectral data are identical to those reported in the literature.<sup>5</sup>

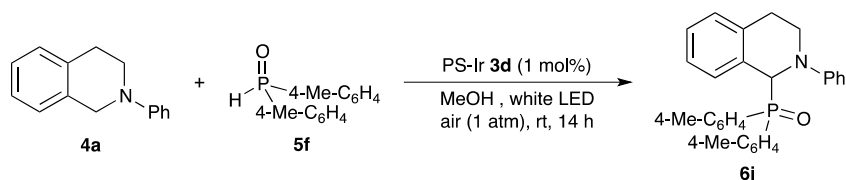**(2-Phenyl-1,2,3,4-tetrahydroisoquinolin-1-yl)di-*p*-tolylphosphine oxide (6j) (Table 2, entry 10).**

Following the above general procedure with **4a** (104.6 mg, 0.500 mmol) and **5f** (115.1 mg, 0.500 mmol) for 14 h. The crude reaction mixture was purified by preparative TLC (1:49 MeOH: $\text{CH}_2\text{Cl}_2$ ) to provide **6j** (0.1860 g, 0.4251 mmol, 85%) as a white solid.  $^1\text{H}$  NMR ( $\text{CDCl}_3$ , 400 MHz)  $\delta$  7.59-7.43 (m, 4H), 7.16-7.14 (m, 2H), 7.06-7.00 (m, 6H), 6.73-6.61 (m, 4H), 5.44 (d, 1H,  $J = 11.0$  Hz), 3.95-3.88 (m, 1H), 3.50-3.47 (m, 1H), 2.75-2.71 (m, 1H), 2.58-2.53 (m, 1H), 2.30 (s, 3H), 2.23 (s, 3H);  $^{13}\text{C}$  NMR ( $\text{CDCl}_3$ , 100 MHz)  $\delta$  149.9 (d,  $J_{\text{C-P}} = 8.6$  Hz), 142.2 (d,  $J_{\text{C-P}} = 2.9$  Hz), 141.9 (d,  $J_{\text{C-P}}$

= 2.9 Hz); 136.7, 132.1 (d,  $J_{C-P}$  = 8.6 Hz), 131.6 (d,  $J_{C-P}$  = 9.5 Hz), 130.1, 129.6, 129.11, 129.08 (d,  $J_{C-P}$  = 1.9 Hz), 128.97 (d,  $J_{C-P}$  = 1.9 Hz), 128.8, 128.6 (d,  $J_{C-P}$  = 5.7 Hz), 127.8 (d,  $J_{C-P}$  = 2.9 Hz), 127.6, 127.2 (d,  $J_{C-P}$  = 2.9 Hz), 125.4 (d,  $J_{C-P}$  = 2.9 Hz), 119.2, 116.5, 61.9 (d,  $J_{C-P}$  = 79.1 Hz), 44.8, 25.5, 21.5 (d,  $J_{C-P}$  = 8.6 Hz);  $^{31}\text{P}$  NMR ( $\text{CDCl}_3$ , 160 MHz)  $\delta$  31.8. This is a known compound and the spectral data are identical to those reported in the literature.<sup>5</sup>

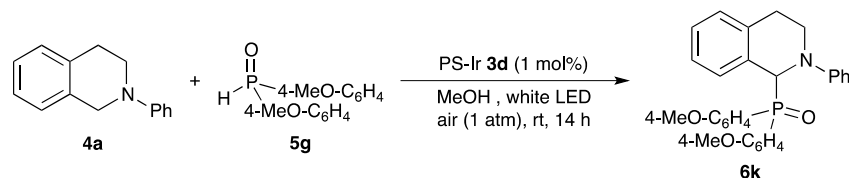

**Bis(4-methoxyphenyl)(2-phenyl-1,2,3,4-tetrahydroisoquinolin-1-yl)phosphine oxide (6k)** (Table 2, entry 11). Following the above general procedure with **4a** (104.6 mg, 0.500 mmol) and **5g** (131.1 mg, 0.500 mmol) for 14 h. The crude reaction mixture was purified by preparative TLC (1:49 MeOH: $\text{CH}_2\text{Cl}_2$ ) to provide **6k** (0.2092 g, 0.4456 mmol, 89%) as a white solid.  $^1\text{H}$  NMR ( $\text{CDCl}_3$ , 400 MHz)  $\delta$  7.70-7.65 (m, 2H), 7.58-7.53 (m, 2H), 7.14-7.10 (m, 3H), 7.05-7.03 (m, 1H), 6.98-6.91 (m, 3H), 6.83-6.72 (m, 6H), 5.48 (d, 1H,  $J$  = 11.5 Hz), 3.98-3.89 (m, 1H), 3.80 (s, 3H), 3.74 (s, 3H), 3.60-3.52 (m, 1H), 2.84-2.78 (m, 1H), 2.63-2.58 (m, 1H);  $^{13}\text{C}$  NMR ( $\text{CDCl}_3$ , 100 MHz)  $\delta$  162.3 (d,  $J_{C-P}$  = 2.9 Hz), 162.1 (d,  $J_{C-P}$  = 2.9 Hz), 149.9 (d,  $J_{C-P}$  = 7.6 Hz), 136.7, 134.0 (d,  $J_{C-P}$  = 9.5 Hz), 133.4 (d,  $J_{C-P}$  = 9.5 Hz), 130.2, 129.0, 127.9 (d,  $J_{C-P}$  = 2.9 Hz), 127.2 (d,  $J_{C-P}$  = 2.9 Hz), 125.4 (d,  $J_{C-P}$  = 2.9 Hz), 124.1, 123.1, 122.6, 121.7, 119.2, 116.3, 113.9 (d,  $J_{C-P}$  = 11.4 Hz), 62.3 (d,  $J_{C-P}$  = 80.1 Hz), 55.2, 55.1, 44.6, 25.6;  $^{31}\text{P}$  NMR ( $\text{CDCl}_3$ , 160 MHz)  $\delta$  31.6; IR (KBr)  $\text{cm}^{-1}$  3423 (m), 3023 (m), 2966 (m), 2840 (m), 1570 (s), 1502 (s), 1297 (s), 1255 (s), 1024 (s); ESI-HRMS ( $m/z$ ) calcd. for  $\text{C}_{29}\text{H}_{29}\text{N}_1\text{O}_3\text{P}_1$  [(M+H) $^+$ ]: 470.18850, found: 470.18622.

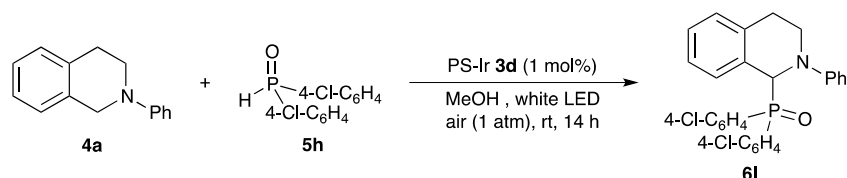

**Bis(4-chlorophenyl)(2-phenyl-1,2,3,4-tetrahydroisoquinolin-1-yl)phosphine oxide (6l)** (Table 2, entry 12). Following the above general procedure with **4a** (104.6 mg, 0.500 mmol) and **5h** (135.5 mg, 0.500 mmol) for 14 h. The crude reaction mixture was purified by preparative TLC (1:49 MeOH: $\text{CH}_2\text{Cl}_2$ ) to provide **6l** (0.2080 g, 0.4348 mmol, 87%) as a white solid.  $^1\text{H}$  NMR ( $\text{CDCl}_3$ , 400 MHz)  $\delta$  7.70 (t, 2H,  $J$  = 8.2 Hz), 7.57 (t, 2H,  $J$  = 8.2 Hz), 7.43-7.40 (m, 2H), 7.31-7.28 (m, 2H), 7.17-7.06 (m, 3H), 6.98 (t, 1H,  $J$  = 7.8 Hz), 6.82-6.71 (m, 4H), 5.50 (d, 1H,  $J$  = 11.0 Hz), 4.03-3.91 (m, 1H), 3.56-3.51 (m, 1H), 2.84-2.77 (m, 1H), 2.66-2.61 (m, 1H);  $^{13}\text{C}$  NMR ( $\text{CDCl}_3$ , 100 MHz)  $\delta$  149.8 (d,  $J_{C-P}$  = 8.6 Hz), 138.7 (d,  $J_{C-P}$  = 3.8 Hz), 138.4 (d,  $J_{C-P}$  = 3.8 Hz), 136.7, 133.4 (d,  $J_{C-P}$  = 9.5 Hz), 132.9 (d,  $J_{C-P}$  = 9.5 Hz), 130.9, 130.1, 129.9, 129.3 (d,  $J_{C-P}$  = 2.9 Hz), 129.2, 128.9, 128.7 (d,  $J_{C-P}$  = 9.5 Hz), 128.6, 127.6 (d,  $J_{C-P}$  = 2.9 Hz), 125.7 (d,  $J_{C-P}$  = 2.9 Hz), 120.1, 117.2, 61.9 (d,  $J_{C-P}$  = 80.1 Hz), 45.4, 25.4;  $^{31}\text{P}$  NMR ( $\text{CDCl}_3$ , 160 MHz)  $\delta$  30.5. This is a known compound and the spectral data are identical to those reported in the literature.<sup>5</sup>

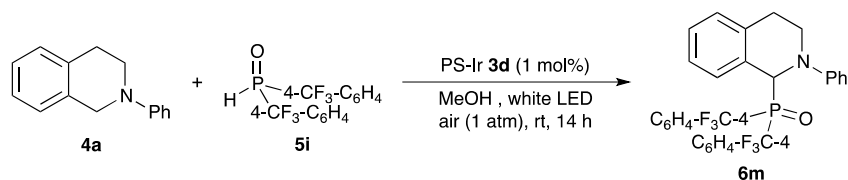

**(2-Phenyl-1,2,3,4-tetrahydroisoquinolin-1-yl)bis(4-(trifluoromethyl)phenyl)phosphine oxide (6m) (Table 2, entry 13).** Following the above general procedure with **4a** (104.6 mg, 0.500 mmol) and **5i** (169.1 mg, 0.500 mmol) for 14 h. The crude reaction mixture was purified by preparative TLC (1:49 MeOH:CH<sub>2</sub>Cl<sub>2</sub>) to provide **6m** (0.1658 g, 0.3040 mmol, 61%) as a white solid. <sup>1</sup>H NMR (CDCl<sub>3</sub>, 400 MHz) δ 7.92 (t, 2H, *J* = 9.6 Hz), 7.81 (t, 2H, *J* = 9.2 Hz), 7.71 (d, 2H, *J* = 6.4 Hz), 7.59 (d, 2H, *J* = 7.8 Hz), 7.20-7.09 (m, 4H), 6.98 (t, 1H, *J* = 7.8 Hz), 6.84-6.77 (m, 3H), 6.64 (d, 1H, *J* = 7.8 Hz), 5.59 (d, 1H, *J* = 10.1 Hz), 4.05-3.95 (m, 1H), 3.58-3.53 (m, 1H), 2.85-2.77 (m, 1H), 2.71-2.66 (m, 1H); <sup>13</sup>C NMR (CDCl<sub>3</sub>, 100 MHz) δ 149.8, 149.7, 136.88, 136.84, 136.5, 136.2, 135.6, 135.3, 134.16, 134.14, 133.85, 133.83, 133.53, 133.50, 132.5, 132.4, 132.1, 132.0, 129.58, 129.56, 129.3, 128.7, 127.90, 127.88, 127.42, 127.38, 125.81, 125.79, 125.52, 125.48, 125.45, 125.41, 125.38, 125.30, 125.26, 125.23, 125.19, 125.15, 125.11, 125.07, 125.04, 124.8, 122.1, 120.7, 117.7, 62.1, 61.3, 45.9, 25.4; <sup>31</sup>P NMR (CDCl<sub>3</sub>, 160 MHz) δ 29.5; <sup>19</sup>F NMR (CDCl<sub>3</sub>, 376 MHz) δ -64.2, -64.3; IR (KBr) cm<sup>-1</sup> 3434 (m), 3061 (m), 2940 (m), 1598 (m), 1506 (m), 1327 (s), 1172 (s), 1065 (s), 1018 (m); ESI-HRMS (*m/z*) calcd. for C<sub>29</sub>H<sub>23</sub>N<sub>1</sub>O<sub>1</sub>F<sub>6</sub>P<sub>1</sub> [(M+H)<sup>+</sup>]: 546.14214, found: 546.14106.

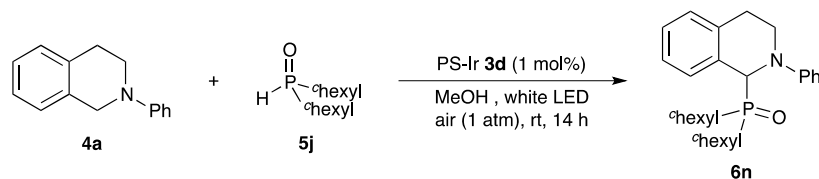

**Dicyclohexyl(2-phenyl-1,2,3,4-tetrahydroisoquinolin-1-yl)phosphine oxide (6n) (Table 2, entry 14).** Following the above general procedure with **4a** (104.6 mg, 0.500 mmol) and **5j** (107.1 mg, 0.500 mmol) for 14 h. The crude reaction mixture was purified by preparative TLC (1:49 MeOH:CH<sub>2</sub>Cl<sub>2</sub>) to provide **6n** (0.1616 g, 0.3833 mmol, 77%) as a white solid. <sup>1</sup>H NMR (CDCl<sub>3</sub>, 400 MHz) δ 7.41-7.40 (m, 1H), 7.20-7.12 (m, 4H), 7.05-7.03 (m, 1H), 6.89 (d, 2H, *J* = 8.2 Hz), 6.82 (t, 1H, *J* = 7.3 Hz), 5.05 (d, 1H, *J* = 13.8 Hz), 4.12-4.05 (m, 1H), 3.73-3.69 (m, 1H), 2.76-2.74 (m, 2H), 2.08-1.91 (m, 4H), 1.85-1.07 (m, 18H); <sup>13</sup>C NMR (CDCl<sub>3</sub>, 100 MHz) δ 150.4 (d, *J*<sub>C-P</sub> = 9.5 Hz), 136.2 (d, *J*<sub>C-P</sub> = 3.8 Hz), 131.7, 129.4 (d, *J*<sub>C-P</sub> = 1.9 Hz), 129.2, 127.5 (d, *J*<sub>C-P</sub> = 3.8 Hz), 127.0 (d, *J*<sub>C-P</sub> = 2.9 Hz), 125.9 (d, *J*<sub>C-P</sub> = 1.9 Hz), 120.3, 118.3, 57.5 (d, *J*<sub>C-P</sub> = 1.9 Hz), 56.8 (d, *J*<sub>C-P</sub> = 2.9 Hz), 46.9, 37.8, 37.4, 36.8, 27.0 (d, *J*<sub>C-P</sub> = 7.6 Hz), 26.9 (d, *J*<sub>C-P</sub> = 3.8 Hz), 26.8 (d, *J*<sub>C-P</sub> = 2.9 Hz), 26.2 (d, *J*<sub>C-P</sub> = 3.8 Hz), 26.1, 26.0, 25.9 (d, *J*<sub>C-P</sub> = 3.8 Hz), 25.0; <sup>31</sup>P NMR (CDCl<sub>3</sub>, 160 MHz) δ 52.9; IR (KBr) cm<sup>-1</sup> 3426 (m), 3056 (w), 3032 (w), 2926 (s), 2852 (s), 1595 (s), 1505 (s), 1449 (m), 1312 (m), 1151 (s); ESI-HRMS (*m/z*) calcd. for C<sub>27</sub>H<sub>37</sub>N<sub>1</sub>O<sub>1</sub>P<sub>1</sub> [(M+H)<sup>+</sup>]: 422.26128, found: 422.25985.

Part III: NMR Spectra of **6a-n**

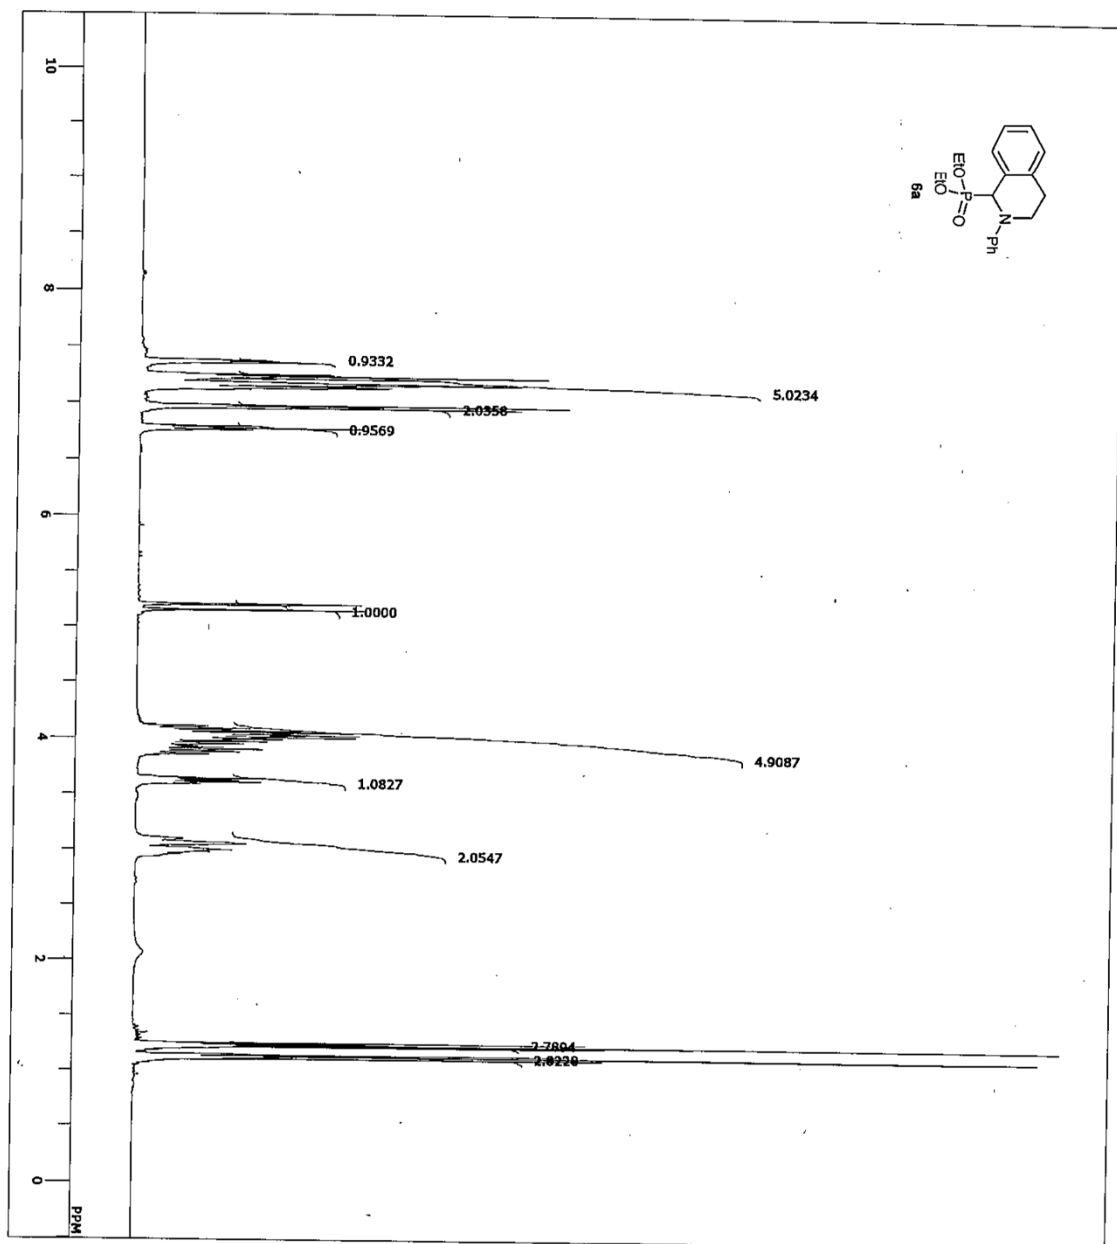

D:\Documents and Settings\Kobayashi\lab\Desktop\WY-16  
 25-07-2013 16:22:43  
 1H  
 300.78 MHz  
 4.19 KHz  
 7.29 Hz  
 16384  
 7503.00 Hz  
 8  
 2.1837 sec  
 2.0000 sec  
 6.50 usec  
 408.6 c  
 7.24 ppm  
 0.42 Hz  
 26

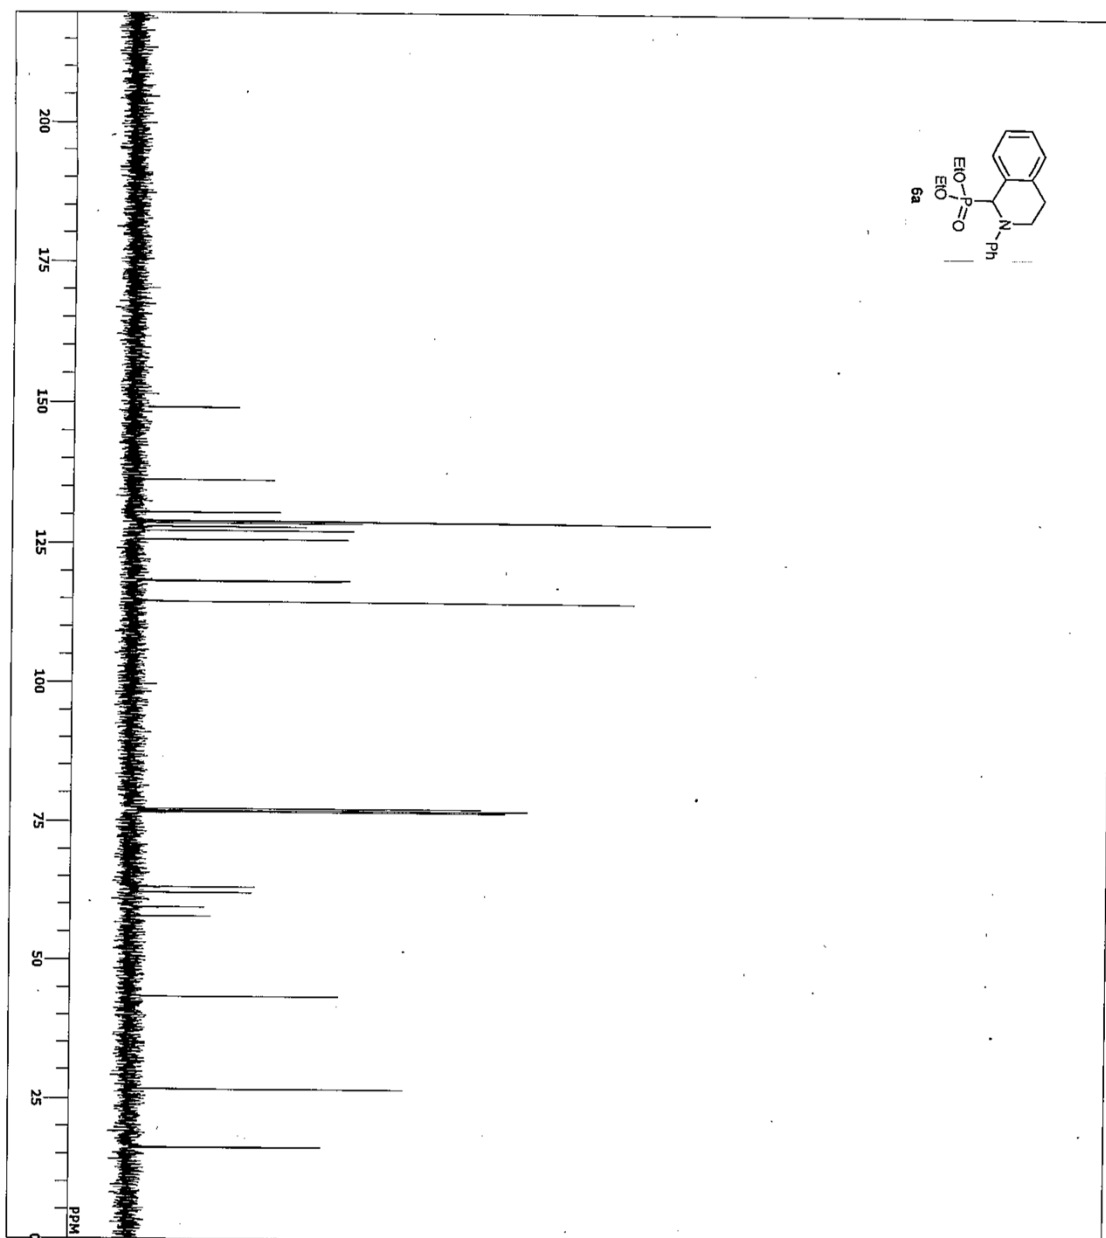

D:\Documents and Settings\Kobayashi\lab\DeskTop\WY-16

DFILE  
 COMNT 25-07-2013 16:26:59  
 DATIM 13C  
 OBNUC single\_pulse\_dec  
 EXMOD 100.53 MHz  
 OBFRQ 5.35 KHz  
 OBSET 5.86 Hz  
 OFETN 32768  
 POINT 31407.03 Hz  
 FREQU 35  
 SCANS 1.0433 sec  
 ACQTM 2.0000 sec  
 PD 3.50 usec  
 PNH 1H 408.6 c  
 TRNUC CDCl3  
 CTIMP 77.00 ppm  
 SLVNT EXREF 0.42 Hz  
 BF 56  
 RGAIN



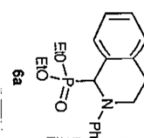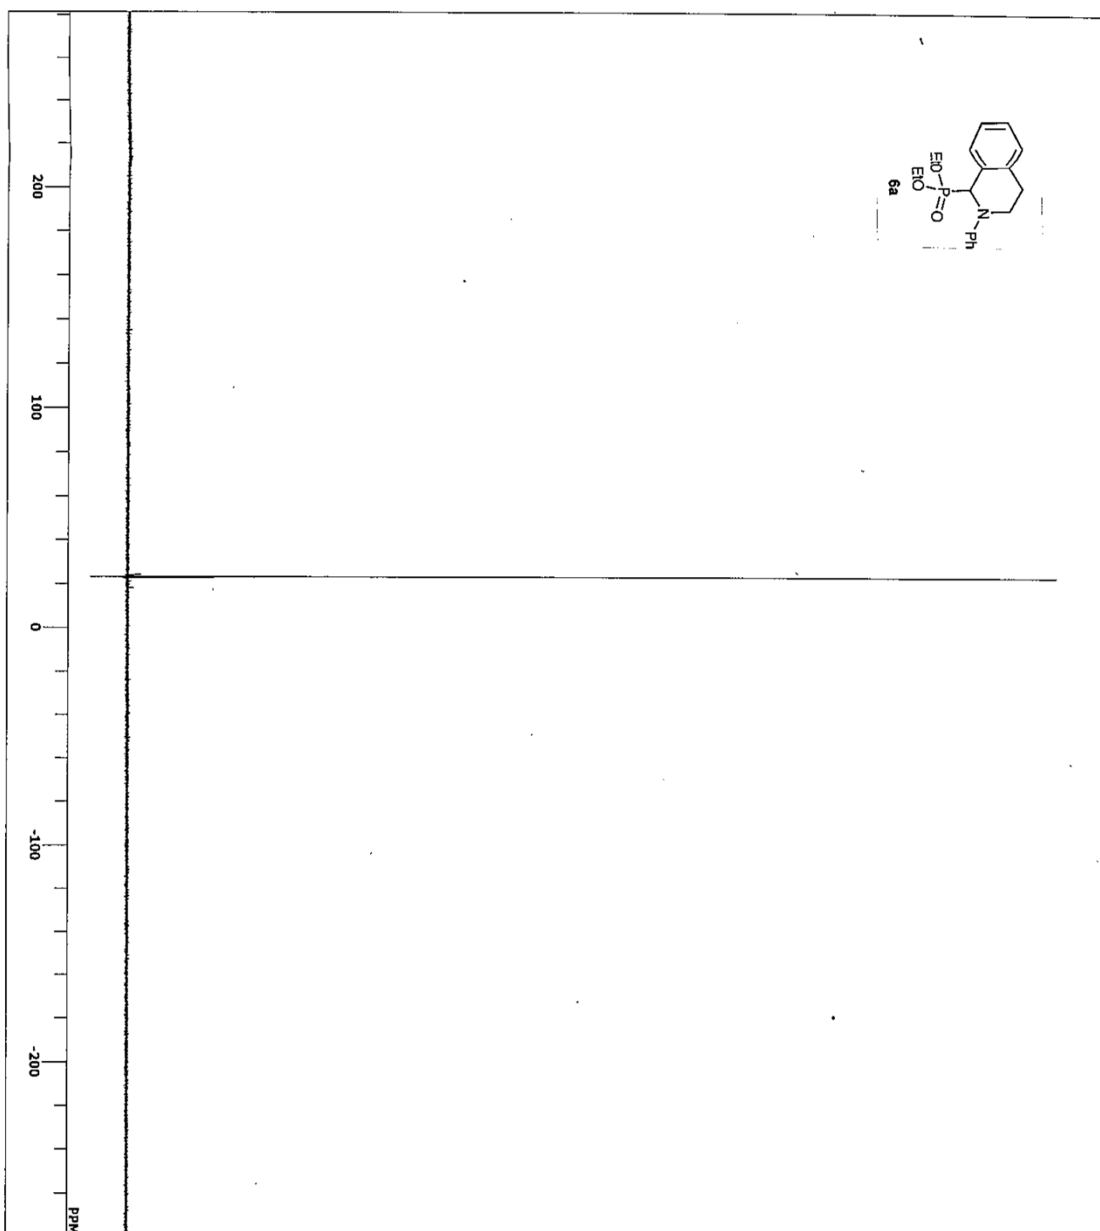

D:\Documents and Settings\Kobayashi\My Desktop\WY-16  
 25-07-2013 16:29:33  
 31P  
 single\_pulse\_dec  
 161.83 MHz  
 4.69 KHz  
 3.09 Hz  
 26213  
 113634.62 Hz  
 4  
 0.2307 sec  
 2.0000 sec  
 5.80 usec  
 1H  
 408.6 c  
 CDCl3  
 23.30 ppm  
 0.42 Hz  
 S2

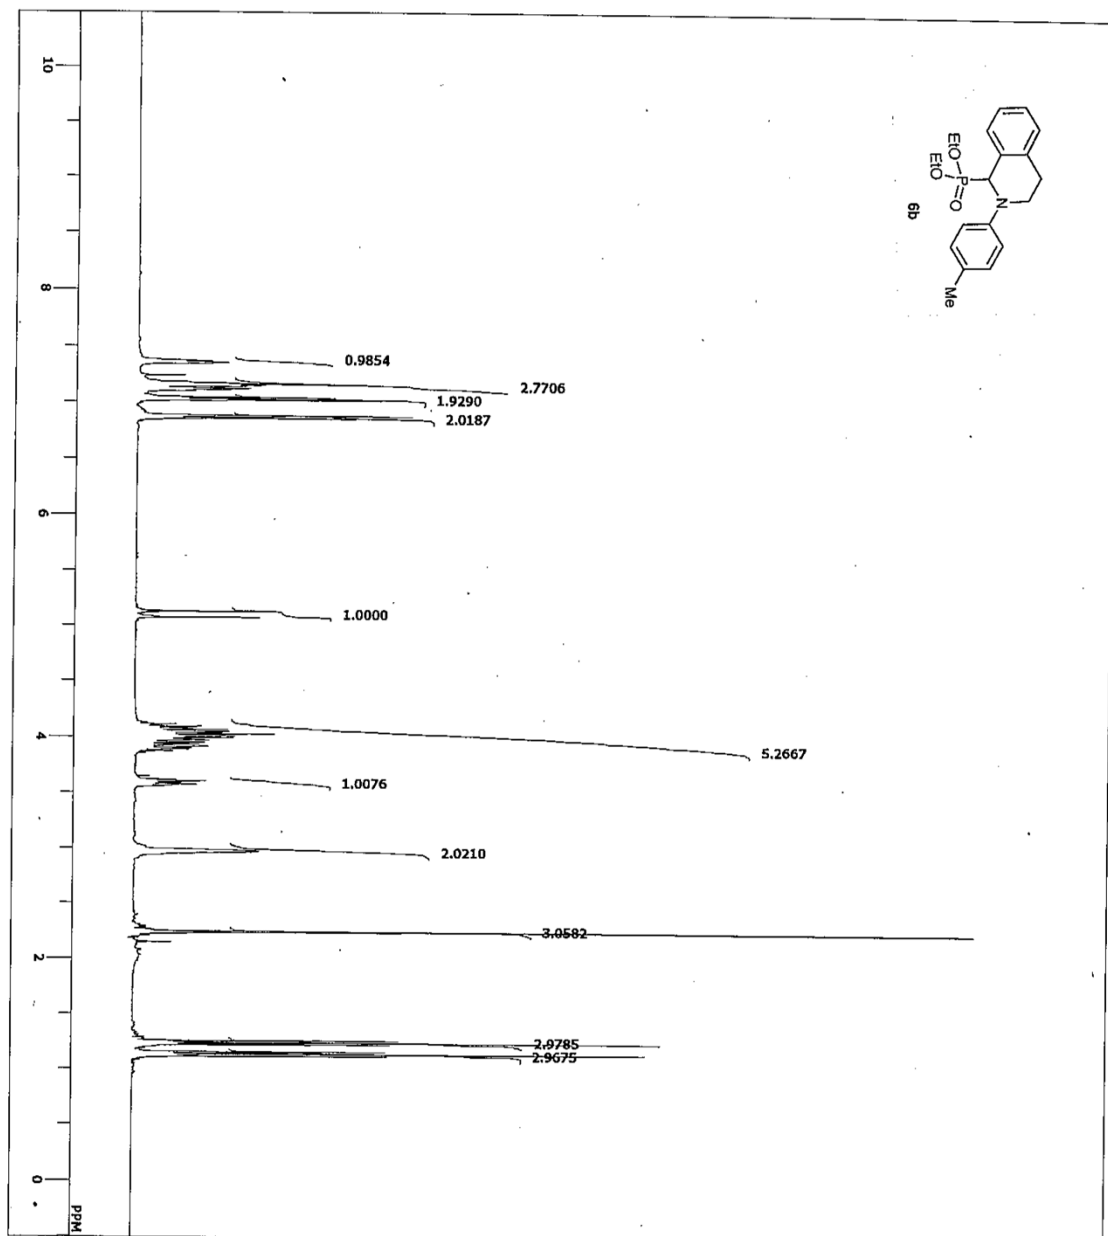

D:\Documents and Settings\Kobayashi\My Desktop\WV-16  
 D:\Documents and Settings\Kobayashi\My Desktop\WV-16  
 24-07-2013 09:31:09  
 1H  
 single\_pulse.ex2  
 399.78 MHz  
 4.19 KHz  
 7.29 Hz  
 16384  
 7503.00 Hz  
 8  
 2.1837 sec  
 2.0000 sec  
 6.50 usec  
 1H  
 1H 408.4 e  
 CDCl3  
 7.24 ppm  
 0.42 Hz  
 28  
 RGAIN

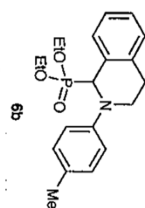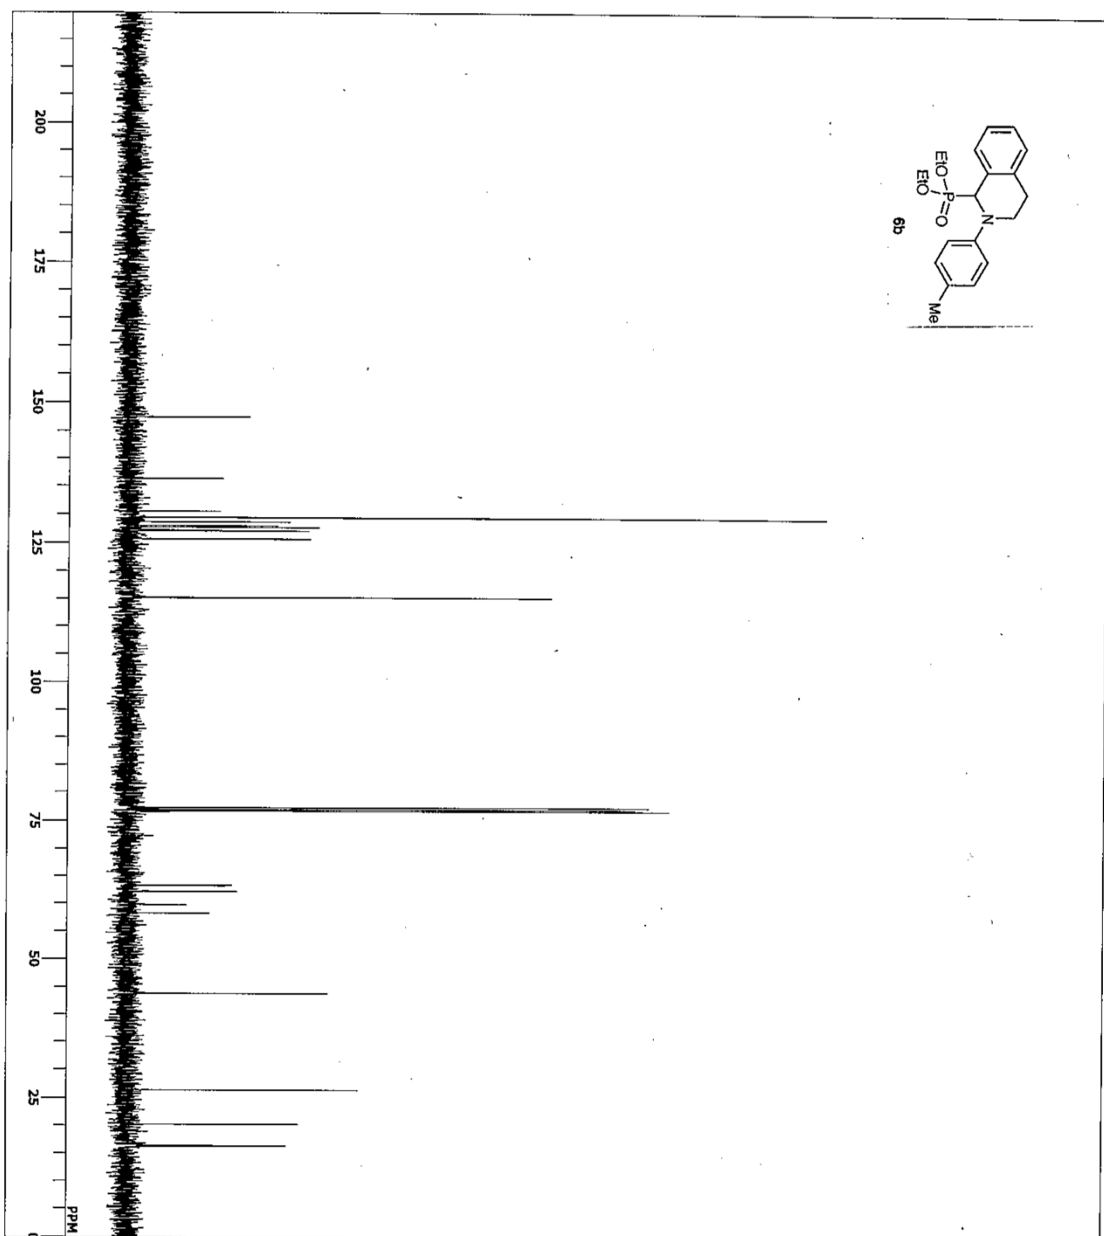

D:\Documents and Settings\Kobayashi\My Desktop\WV-16

DFILE COMNT 24-07-2013 09:36:16  
 DATIM 13C  
 ORNUC single\_pulse\_dac  
 EXMOD 100.53 MHz  
 ORFRQ 5.35 kHz  
 ORSET 5.86 Hz  
 ORFIN 32768  
 POINT 31407.03 Hz  
 FREQ0 583  
 SCANS 1.0433 sec  
 ACQTIM 2.0000 sec  
 PUL1 3.50 usec  
 TRNUC 1H 408.4 c  
 CTIMP CDCl3  
 SLYNT 77.00 ppm  
 EXREF 0.42 Hz  
 BF 54  
 RGAIN

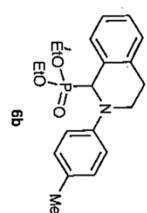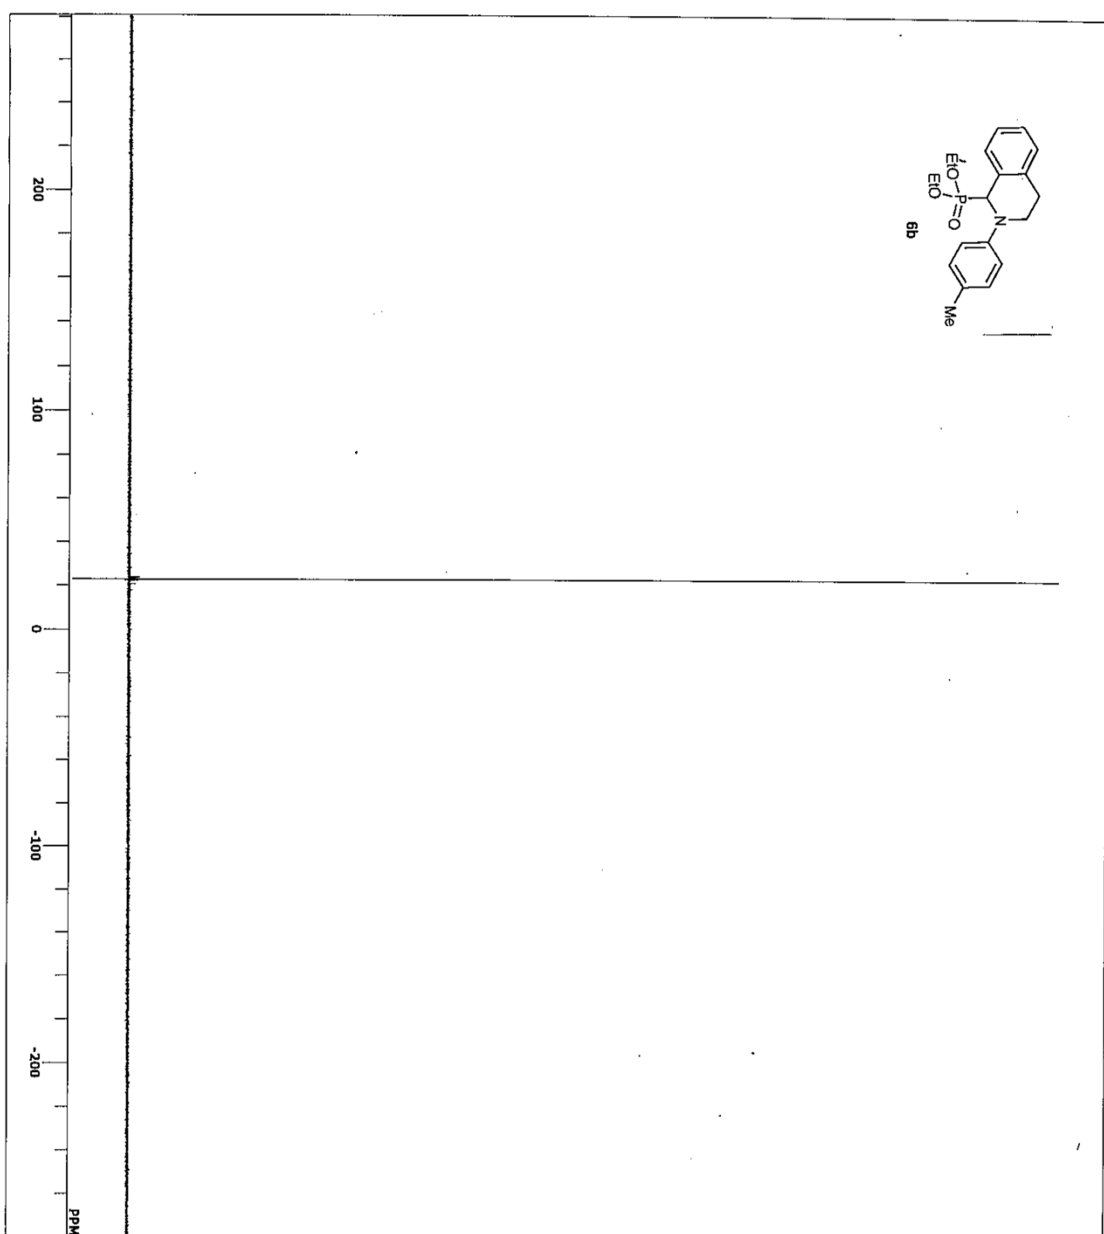

D:\Documents and Settings\Kobayashi\lab\Desktop\WV-16

|       |                     |
|-------|---------------------|
| DFILE | 24-07-2013 09:38:53 |
| COMNT | 31P                 |
| DATIM | single_pulse_dec    |
| OBNUC | 161.83 MHz          |
| EXMOD | 4.69 KHz            |
| OBFRQ | 3.09 Hz             |
| OBSET | 26213               |
| OBFIN | 113634.62 Hz        |
| POINT | 10                  |
| FREQ  | 0.2307 sec          |
| SCANS | 2.0000 sec          |
| ACQTM | 5.80 usec           |
| PD    |                     |
| PW1   | 1H 408.4 c          |
| IRNUC | CDCl3               |
| TEMP  | 0.000 ppm           |
| SVMT  | 0.42 Hz             |
| EXREF |                     |
| BF    | 56                  |
| RGAIN |                     |

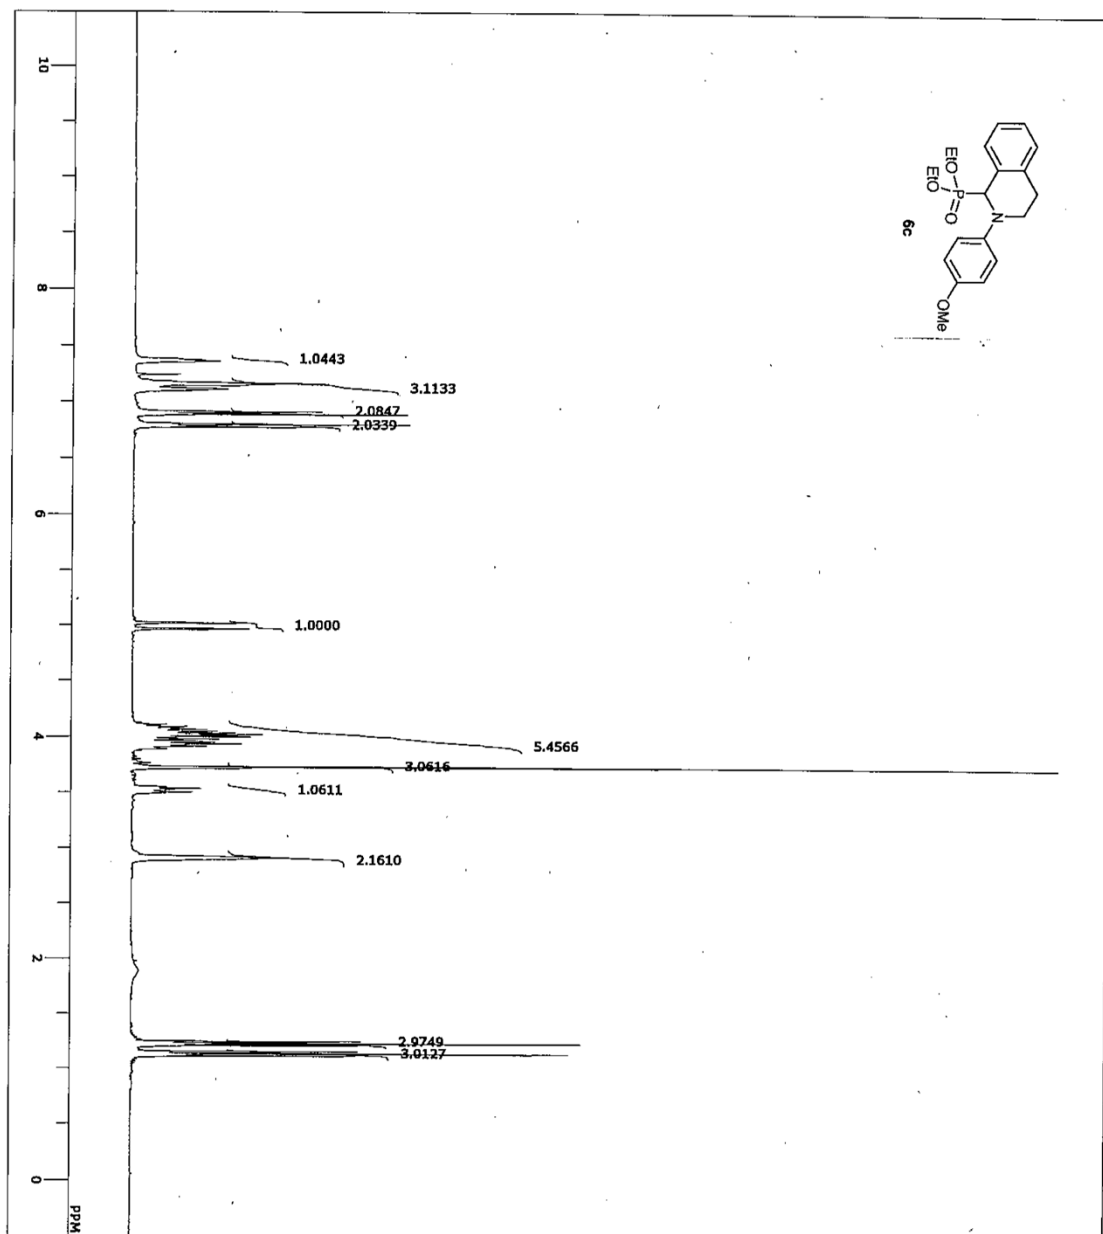

D:\Documents and Settings\Kobayashi\lab\Desktop\WV-16  
 DFILE 24-07-2013 09:42:53  
 CONNT 1H  
 DATIM single\_pulse.ex2  
 OBNUC 1H  
 EXMOD 399.78 MHz  
 OBRQ 4.13 kHz  
 OBRF 7.23 Hz  
 OBTIN 16384  
 POUNT 7509.00 Hz  
 FREQU 7509.00 Hz  
 SCANS 2.1837 sec  
 ACQTM 2.0000 sec  
 PD 6.50 usec  
 PW1 1H  
 IRNUC 408.4 c  
 CTMP CDCl<sub>3</sub>  
 SILVT 7.24 ppm  
 EXREF 0.42 Hz  
 BF 32  
 RGAIN

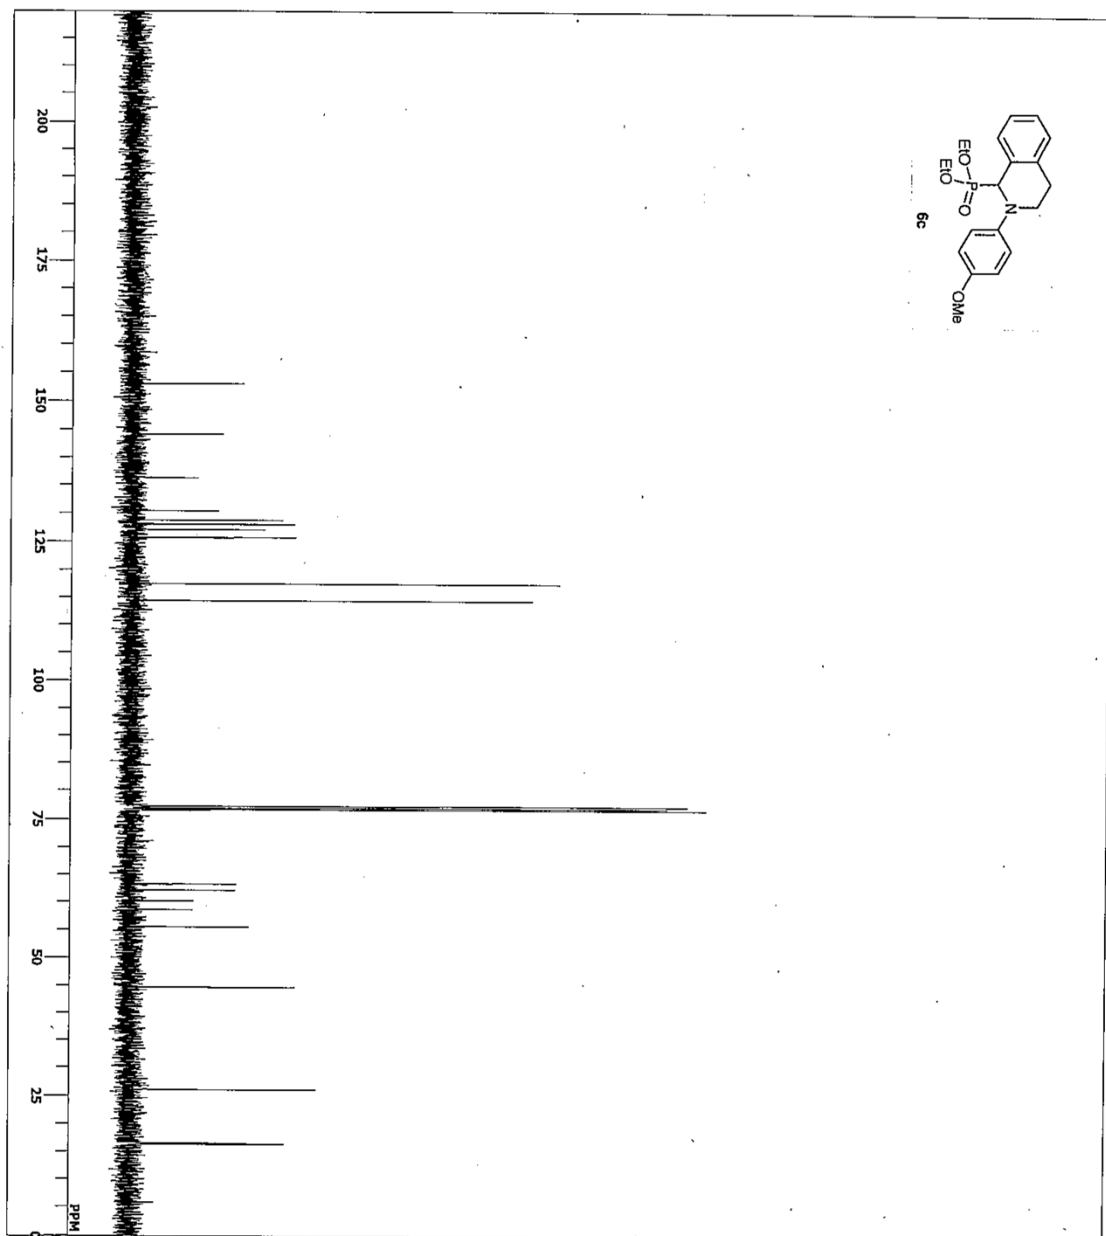

D:\Documents and Settings\Kobayashi\lab\Desktop\WV-16  
 D:\Documents and Settings\Kobayashi\lab\Desktop\WV-16  
 24-07-2013 09:49:20  
 13C  
 single\_pulse\_dec  
 100.53 MHz  
 5.35 kHz  
 32768  
 31407.03 Hz  
 76  
 1.0433 sec  
 2.0000 sec  
 3.50 usec  
 1H 408.4 c  
 CDCl3  
 77.00 ppm  
 0.42 Hz  
 60

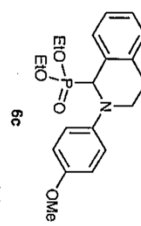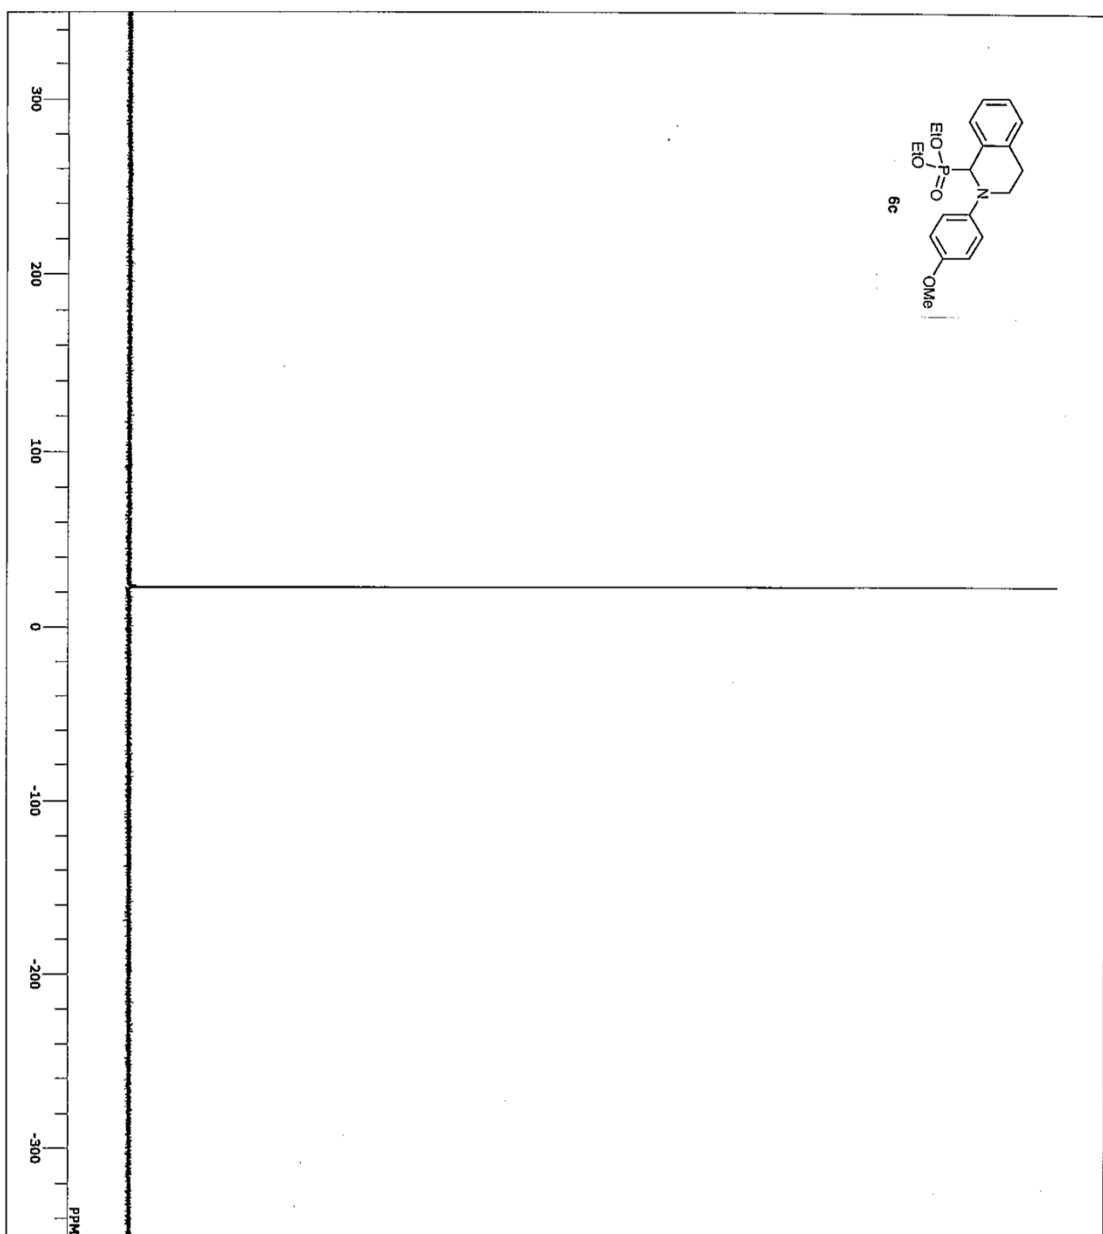

D:\Documents and Settings\Kobayashi\lab\VDestkop\WV-16  
 DFILE  
 COMNT 24-07-2013 09:52:02  
 DATIM 31P  
 OBNUC single\_pulse\_dec  
 EXMOD 161.83 MHz  
 OBRFQ 4.69 KHz  
 OBSST 3.09 Hz  
 OBFIN 32768  
 POINT 142045.45 Hz  
 FREQU 13  
 SCANS 0.2307 sec  
 ACQTM PD 2.0000 sec  
 PW1 5.80 usec  
 TRUNC 1H 408.4 c  
 TREF CDCl<sub>3</sub>  
 SUNIT 0.00 ppm  
 EXREF 0.42 Hz  
 BF 56  
 RGAIN

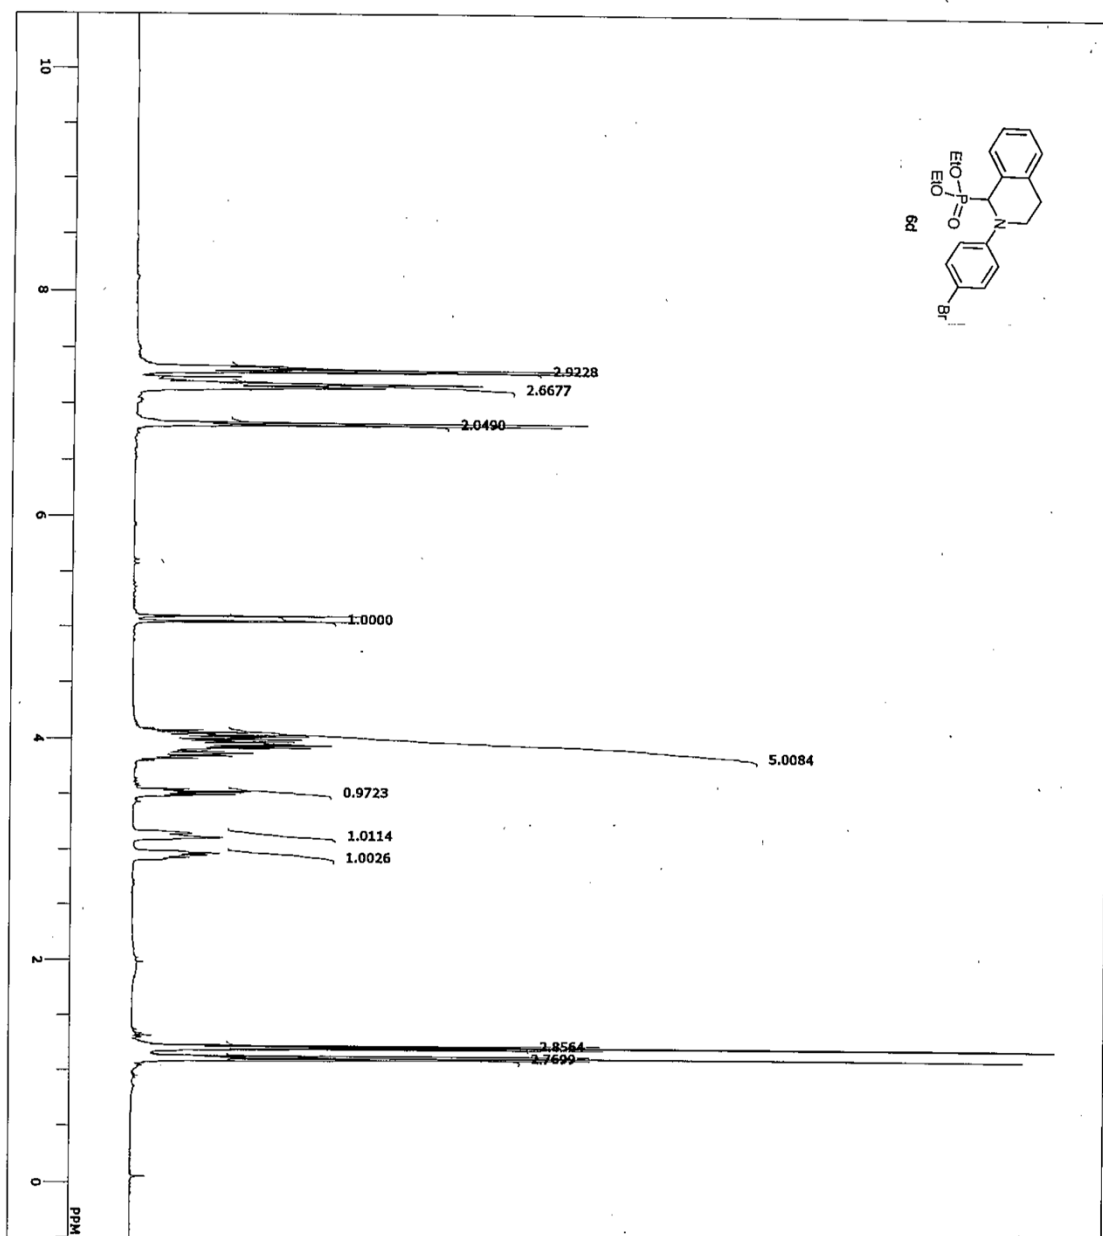

D:\Documents and Settings\Kobayashi\My Desktop\WY-16  
 DFILE 24-07-2013 09:55:41  
 COMNT 1H  
 DATIN single\_pulse\_x2  
 OBNUC 399.78 MHz  
 EXMOD 7.28 Hz  
 OBSRT 10364  
 OBSIN 7303.00 Hz  
 FIDOUT 7303.00 Hz  
 FIDOUT 7303.00 Hz  
 SCANS 2.1837 sec  
 ACQTM 2.0000 sec  
 PD 6.50 usec  
 PWT 1H  
 IRNUC 408.4 c  
 CTMPC CDCl3  
 SLVNT 7.24 ppm  
 EXREF 0.42 Hz  
 BF 32  
 RGAIN



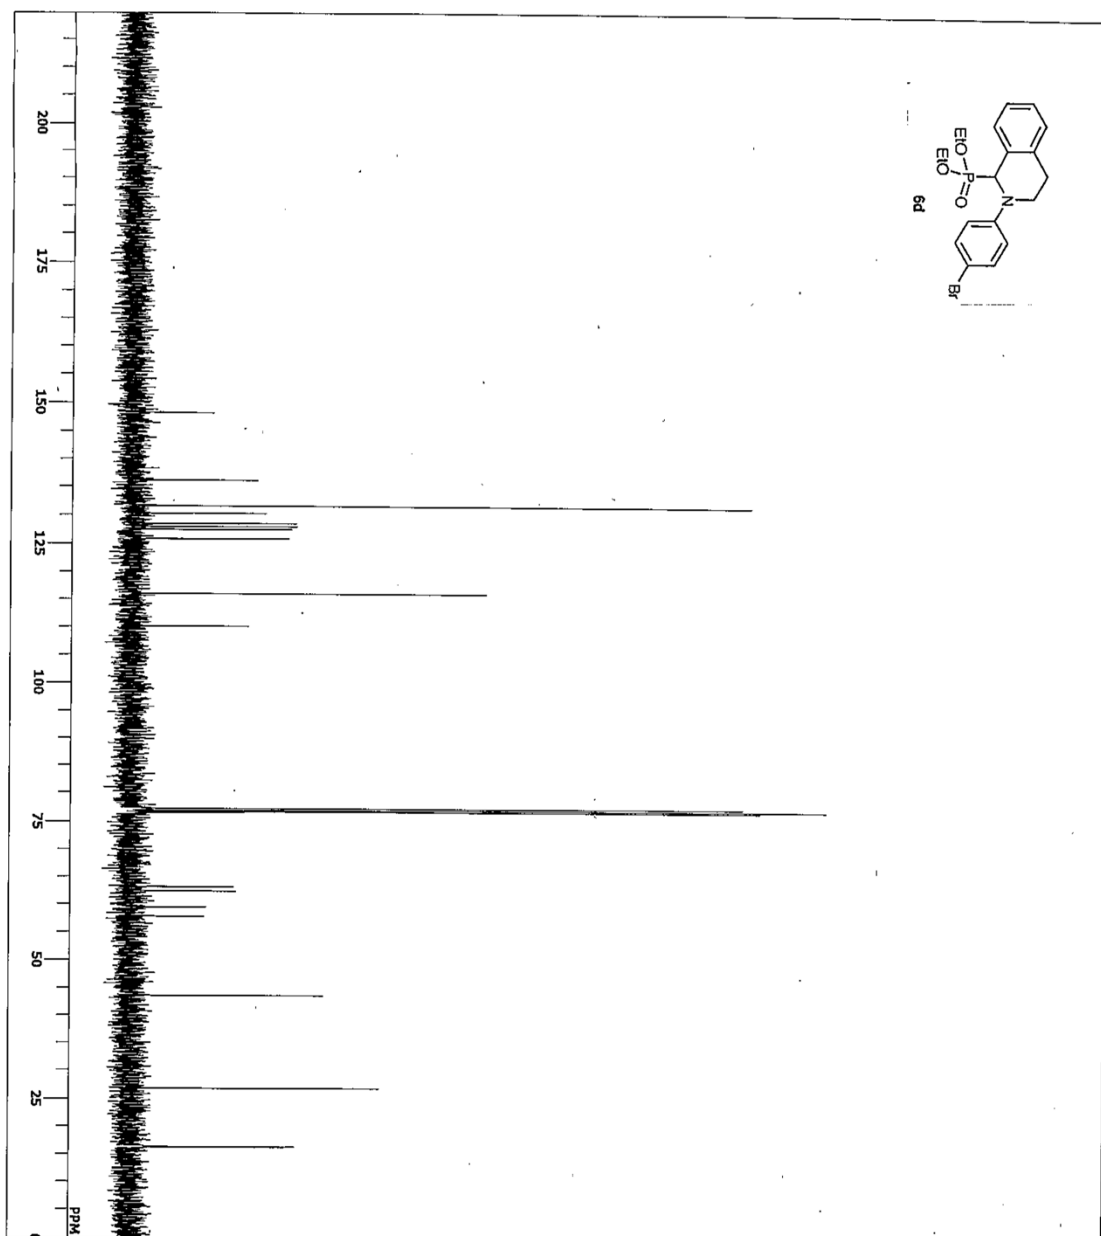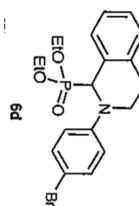

D:\Documents and Settings\Kobayashi\lab\Desktop\WV-16  
 DFILE 24-07-2013 10:01:57  
 COMNT 13C  
 DATIM 13C  
 EXMOD single\_pulse\_dec  
 EXPRQ 100.53 MHz  
 OBSST 5.53 MHz  
 OBSST 32.56 Hz  
 POINT 32.56 Hz  
 FREQU 31407.83 Hz  
 SCANS 72  
 ACQTM 1.0433 sec  
 PD 2.0000 sec  
 PW1 3.50 usec  
 TRNUC 1H  
 CTEND 408.4 c  
 SLVNT CDCl3  
 EXREF 77.00 ppm  
 BF 0.42 Hz  
 RGAIN 56

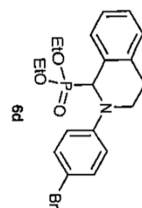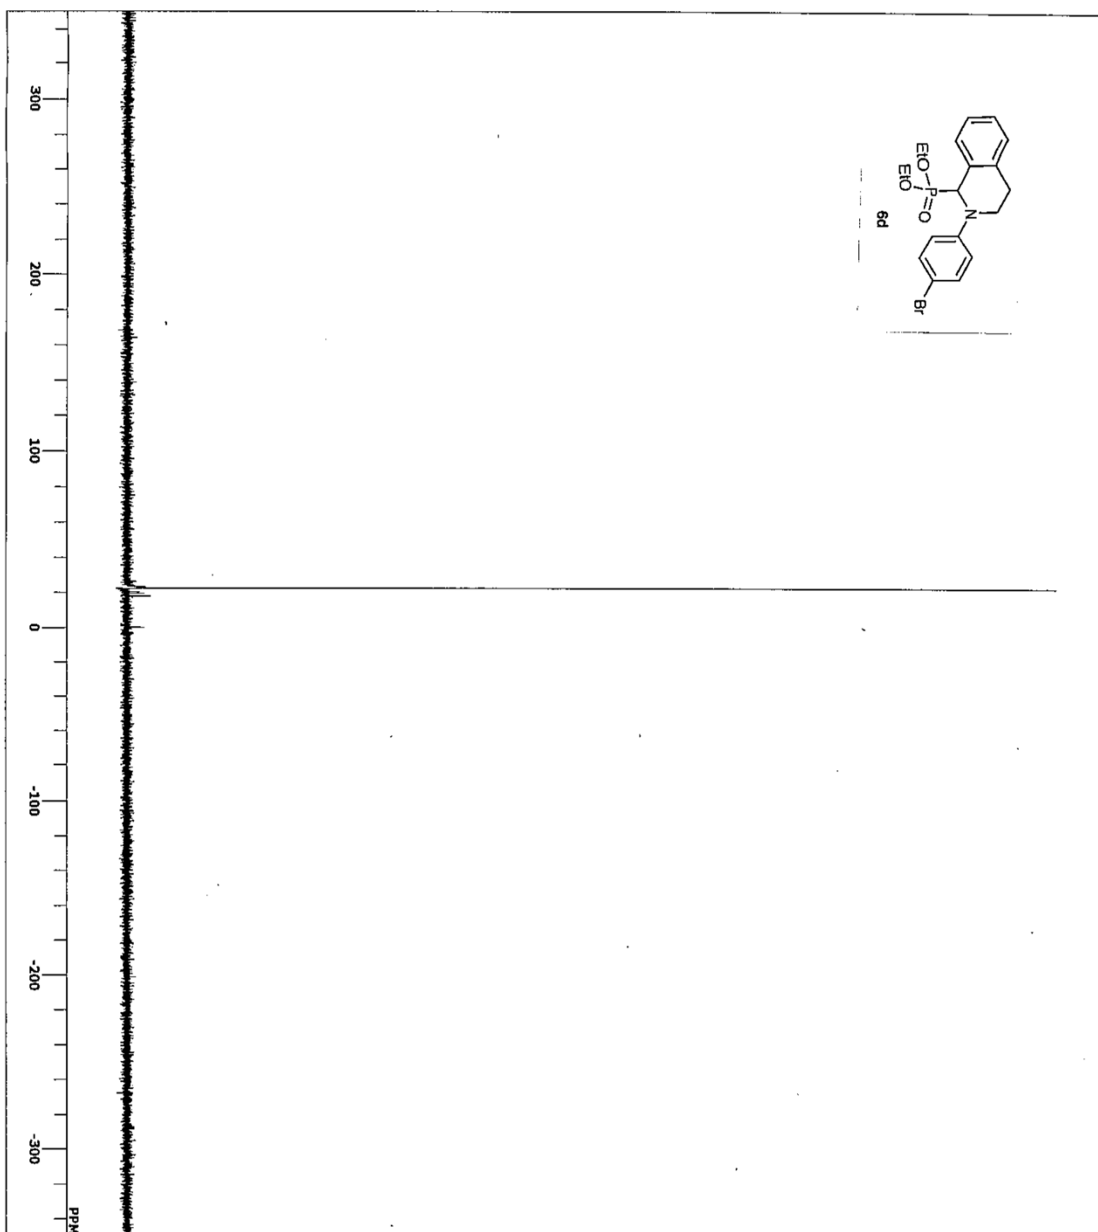

D:\Documents and Settings\Kobayashi\lab\Desktop\WV-16  
 COUNT 24-07-2013 10:04:42  
 DAIN 31P  
 OBNUC single, pulse, dec  
 EXMOD 161.83 MHz  
 OBFREQ 4.69 Hz  
 OBFEN 3.09 Hz  
 POINT 32768  
 FREQU 142045.45 Hz  
 SCANS 14  
 ACQTM 0.2307 sec  
 PD 2.0000 sec  
 PUL 5.80 usec  
 JNNUC 1H 408.4 c  
 JENP CDCl3  
 SLMT 0.00 ppm  
 EXREF 0.42 Hz  
 BF 56  
 RGAIN 56

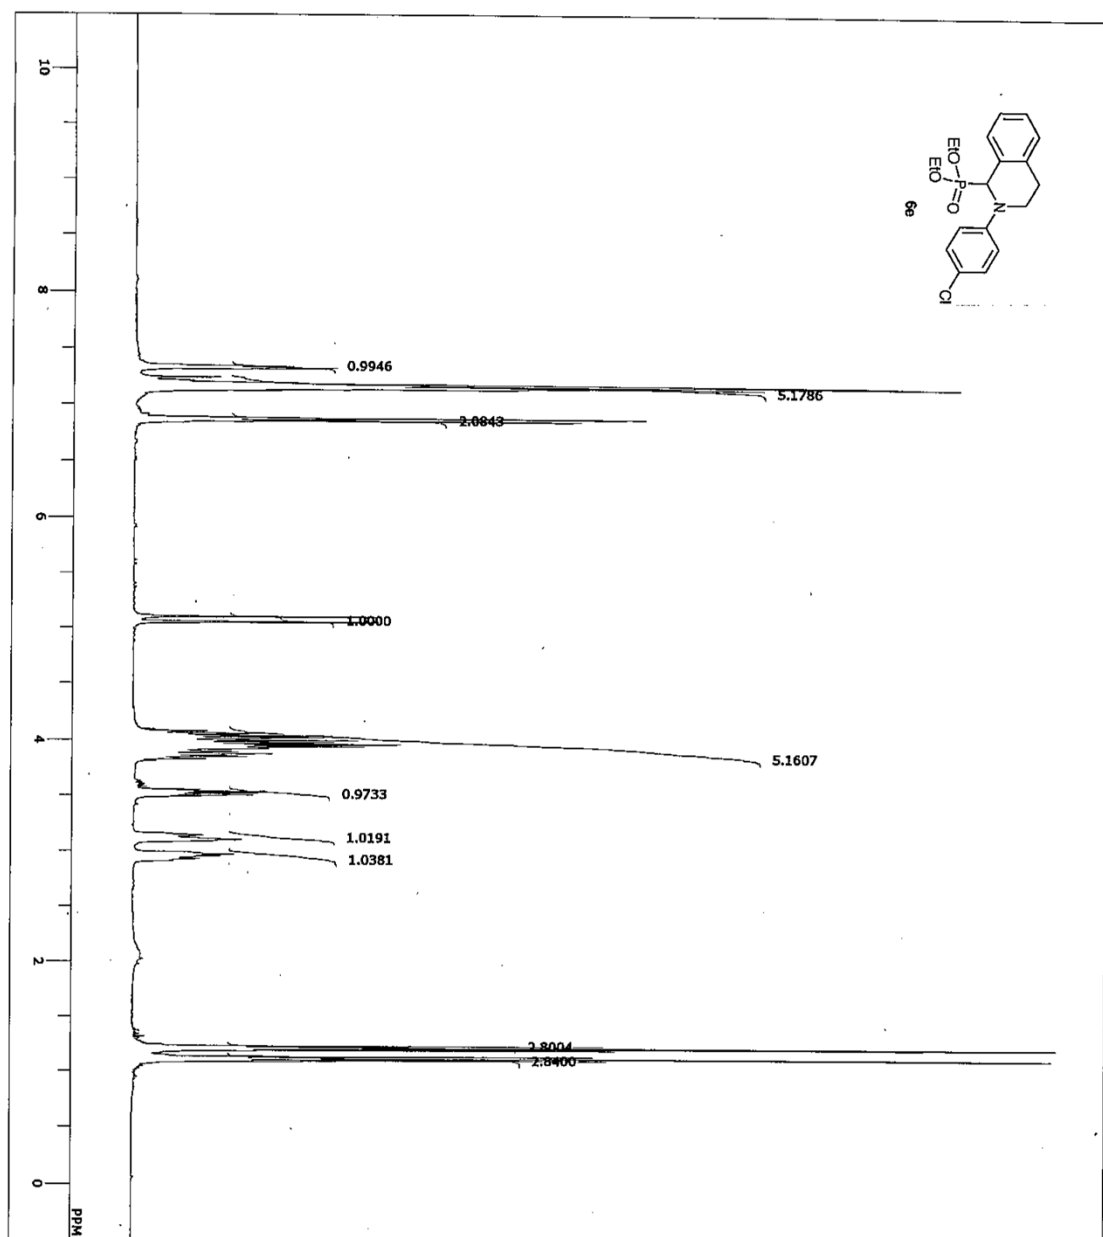

D:\Documents and Settings\Kobayashi\lab\Desktop\WY-16  
 DFILE  
 COMNT 24-07-2013 10:08:07  
 DATIM 1H  
 EXMUD single\_pulse.ac2  
 DBFRO 399.76 MHz  
 OBSF 400.14 MHz  
 OBEN 7.24 Hz  
 POINT 16384  
 FREQ 7503.00 Hz  
 SCANS 8  
 ACQTM 2.1837 sec  
 PD 2.0000 sec  
 PW1 6.50 usec  
 IRNUC 1H  
 CTMP 408.4 c  
 CLVNT CDCL3  
 EXREF 7.24 ppm  
 BF 0.42 Hz  
 RGAIN 32

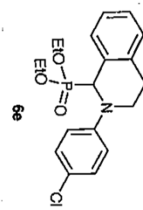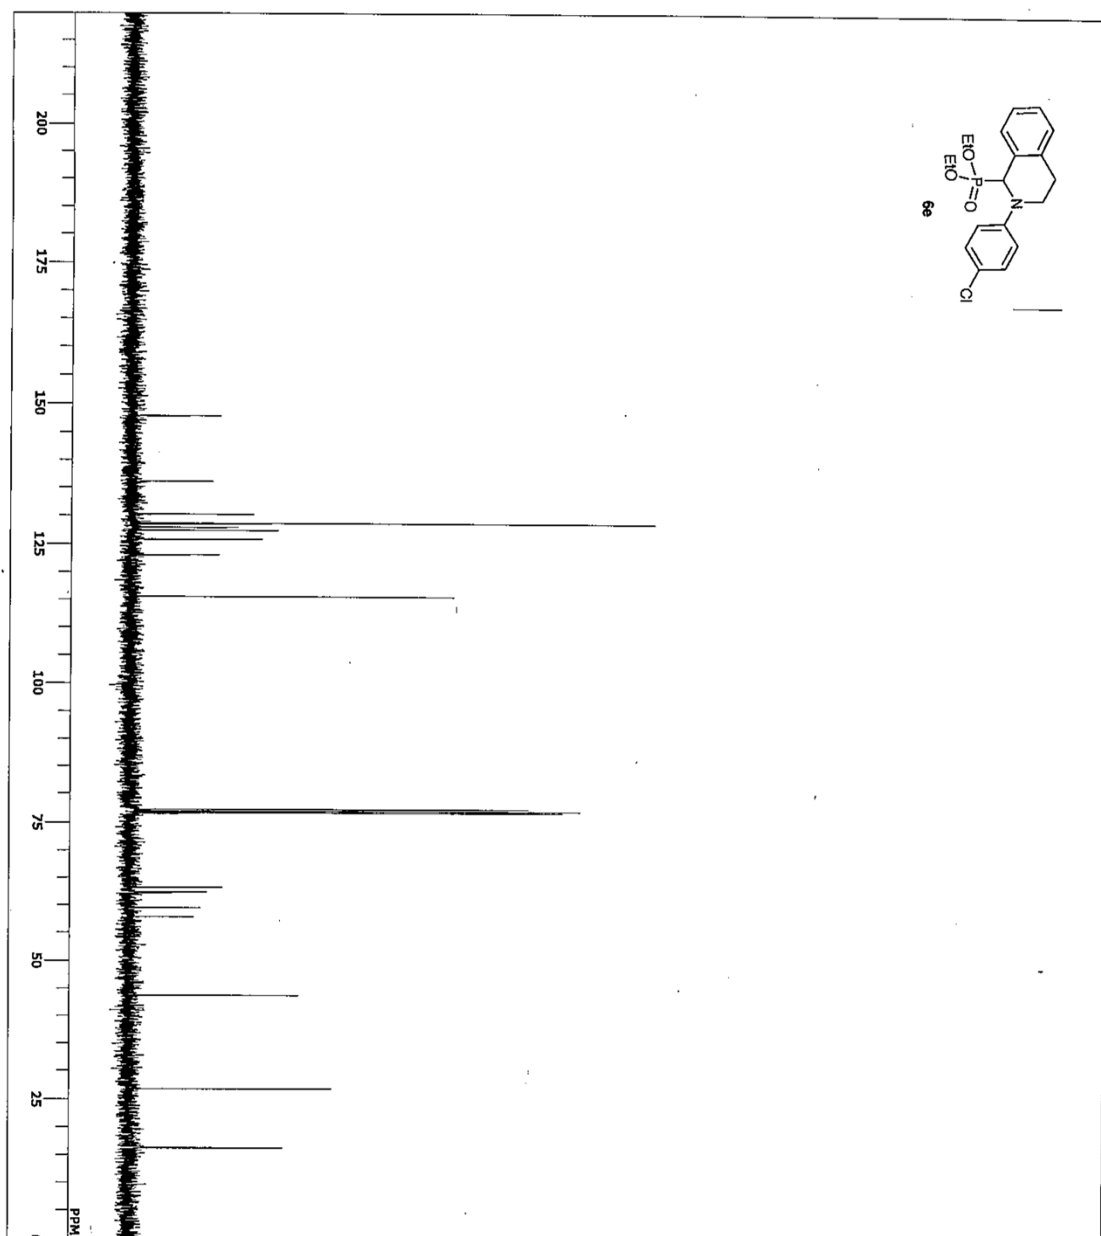

D:\Documents and Settings\Kobayashi\My Desktop\WV-16

DFILE COMNT 24-07-2013 10:15:03  
 DATIN 13C  
 ORNUC single\_pulse\_dec  
 EXMOC 100.53 MHz  
 ORPRQ 5.35 KHz  
 ORSET 5.85 Hz  
 ORFTN 32768  
 POINT 31607.03 Hz  
 FREQ 31607.03 Hz  
 SCANS 1.0433 sec  
 ACQTM 2.0000 sec  
 PD 3.50 usec  
 PWL 1H 408.4 c  
 TRNUC CDCL3  
 CTENP 77.00 ppm  
 SILNT 0.42 Hz  
 EXREF 54  
 BF 54  
 RGAIN 54

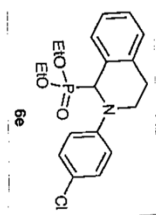

6e

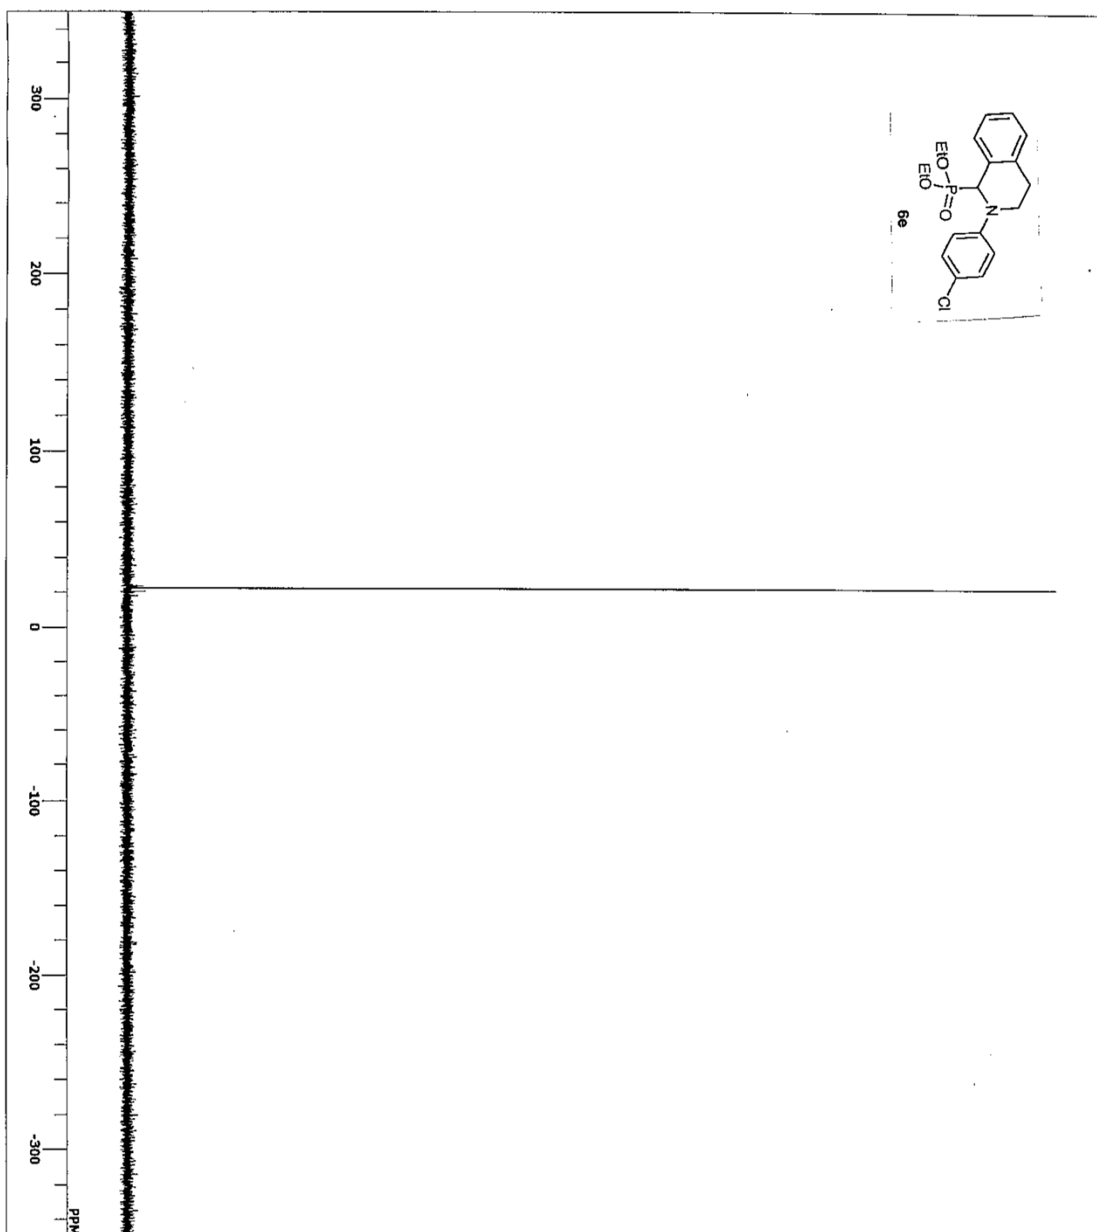

D:\Documents and Settings\Kobayashi\lab\Desktop\WV-16  
 24-07-2013 10:17:25  
 31P  
 single, pulse, dec  
 161.83 MHz  
 4.69 kHz  
 3.09 Hz  
 32768  
 142045.45 Hz  
 3  
 0.2307 sec  
 2.0000 sec  
 5.80 usec  
 1H 408.5 c  
 CDCl3  
 0.00 ppm  
 0.42 Hz  
 56

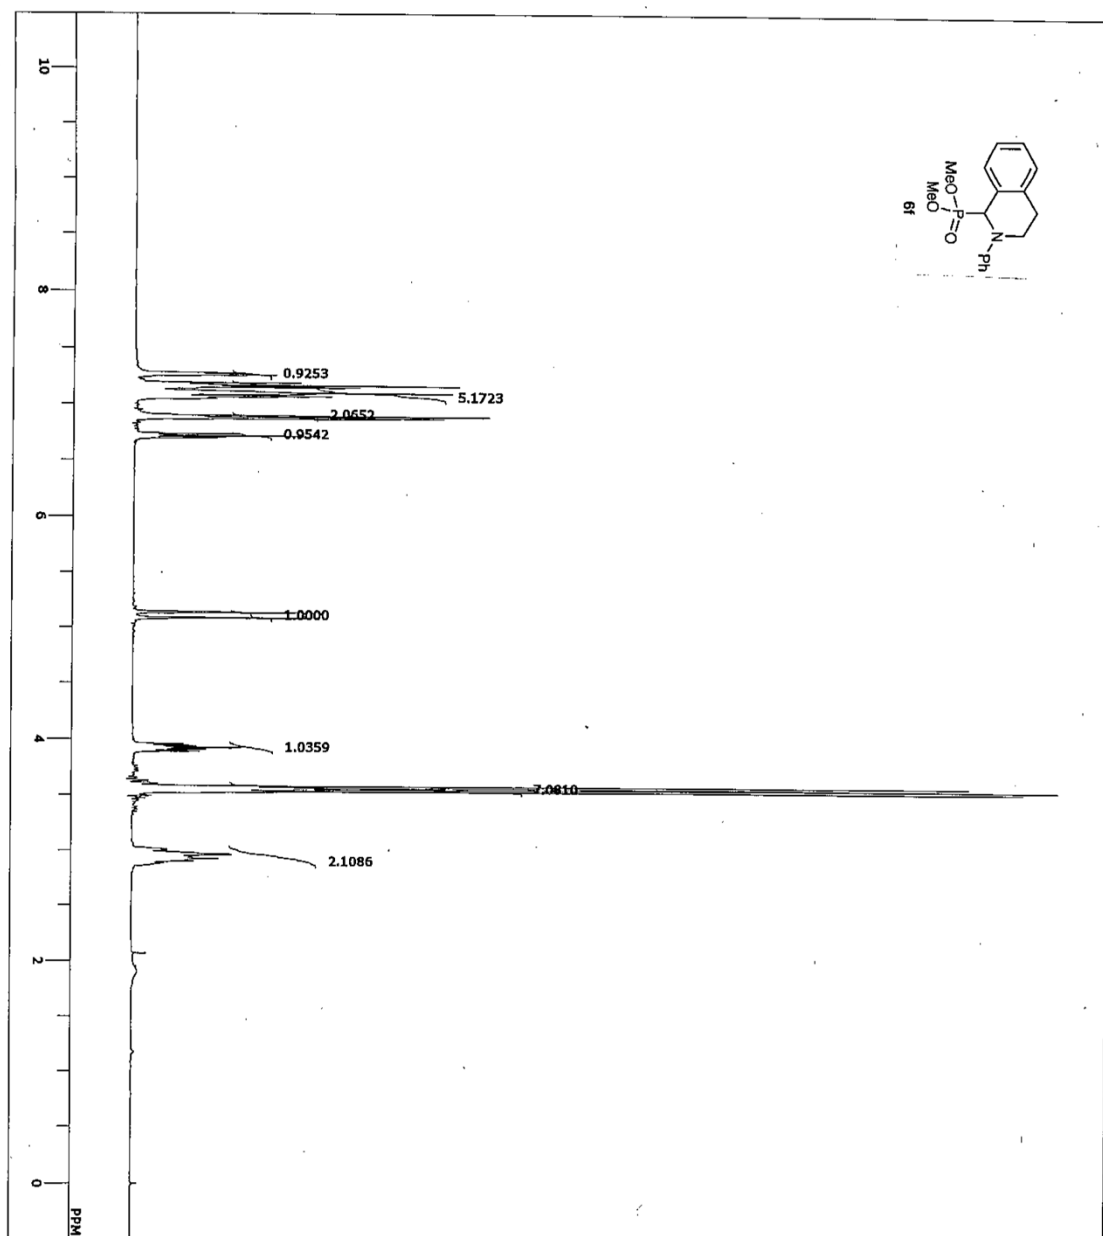

D:\Documents and Settings\Kobayashi\lab\Desktop\pww-16  
 DFILE 23-07-2013 14:26:29  
 COMNT 1H  
 DATIM 1H  
 EXHUC single\_pulse.ex2  
 EXHUC 359.78 MHz  
 OBSFQ 413 MHz  
 OBSFQ 413 MHz  
 POINT 14584  
 FREQU 7503.00 Hz  
 SCANS 8  
 ACQTM 2.1837 sec  
 PD 2.0000 sec  
 PW1 6.50 usec  
 TRNUC 1H  
 CTMPC 408.6 c  
 SILVNT CDCl<sub>3</sub>  
 EXREF 0.00 ppm  
 BF 0.42 Hz  
 RGAIN 28

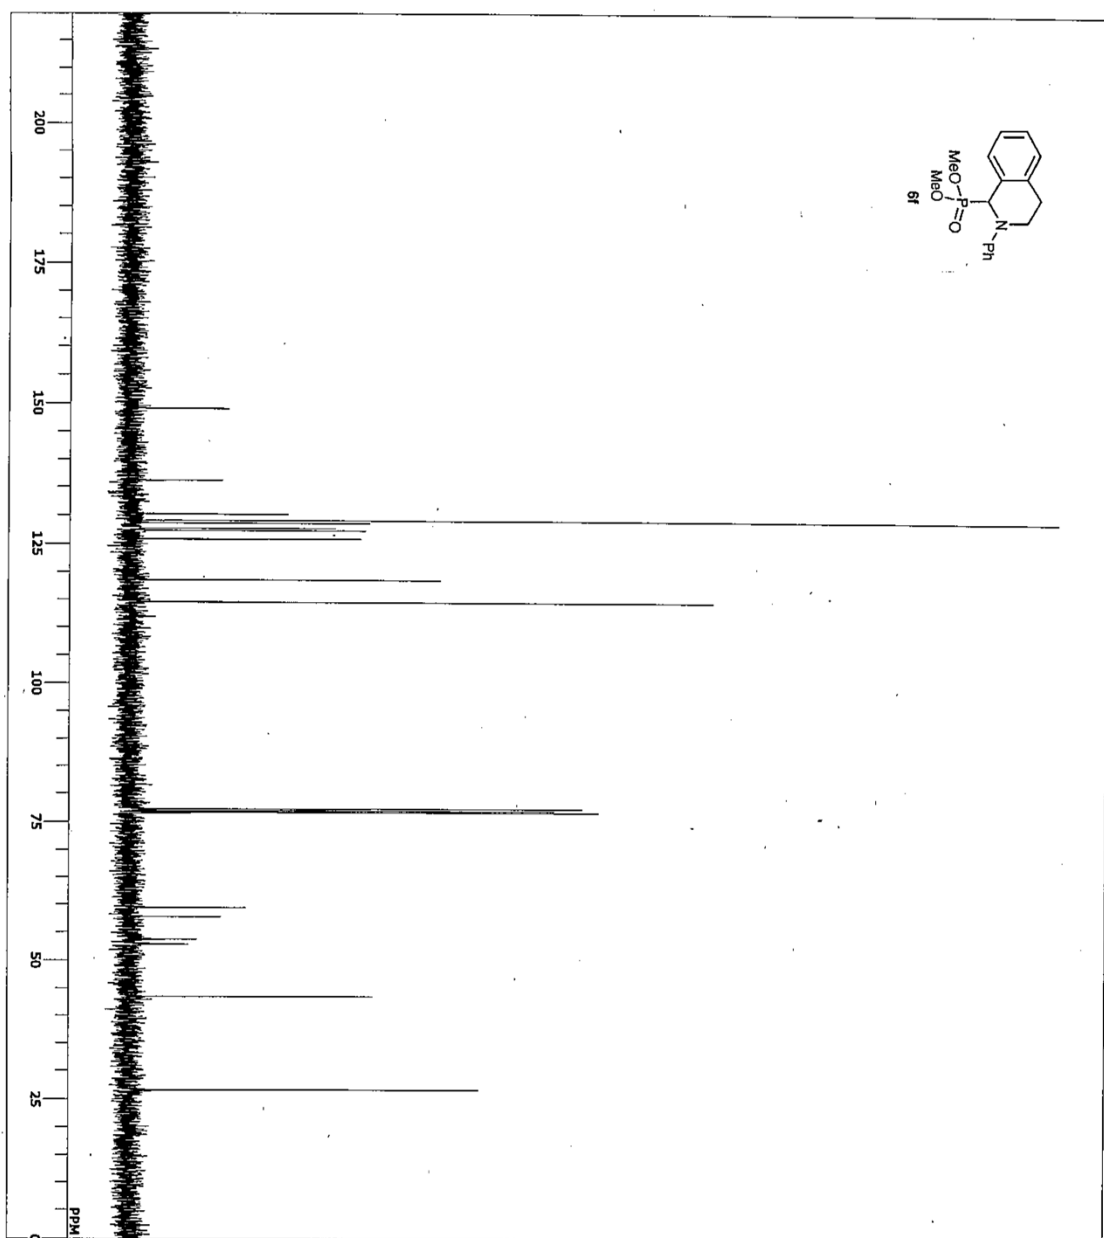

D:\Documents and Settings\Kobayashi\lab\Desktop\WV-16  
 DFILE  
 COMNT 23-07-2013 14:30:59  
 DATM 13C  
 OBNUC single\_pulse\_dec  
 EXMOD 100.53 MHz  
 OBSFQ 5.35 kHz  
 OBSL 5.86 Hz  
 OBFN 32758  
 PD 31407.03 Hz  
 FREQ 1.033 sec  
 SCNS 2.0000 sec  
 ACQTM 3.50 usec  
 PD 77.00 ppm  
 PUL 54  
 IRNUC 1H 408.6 c  
 CTMP CDCL3  
 SLVT 0.42 Hz  
 EXREF 54  
 RGAIN 54

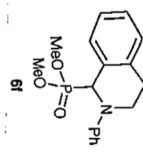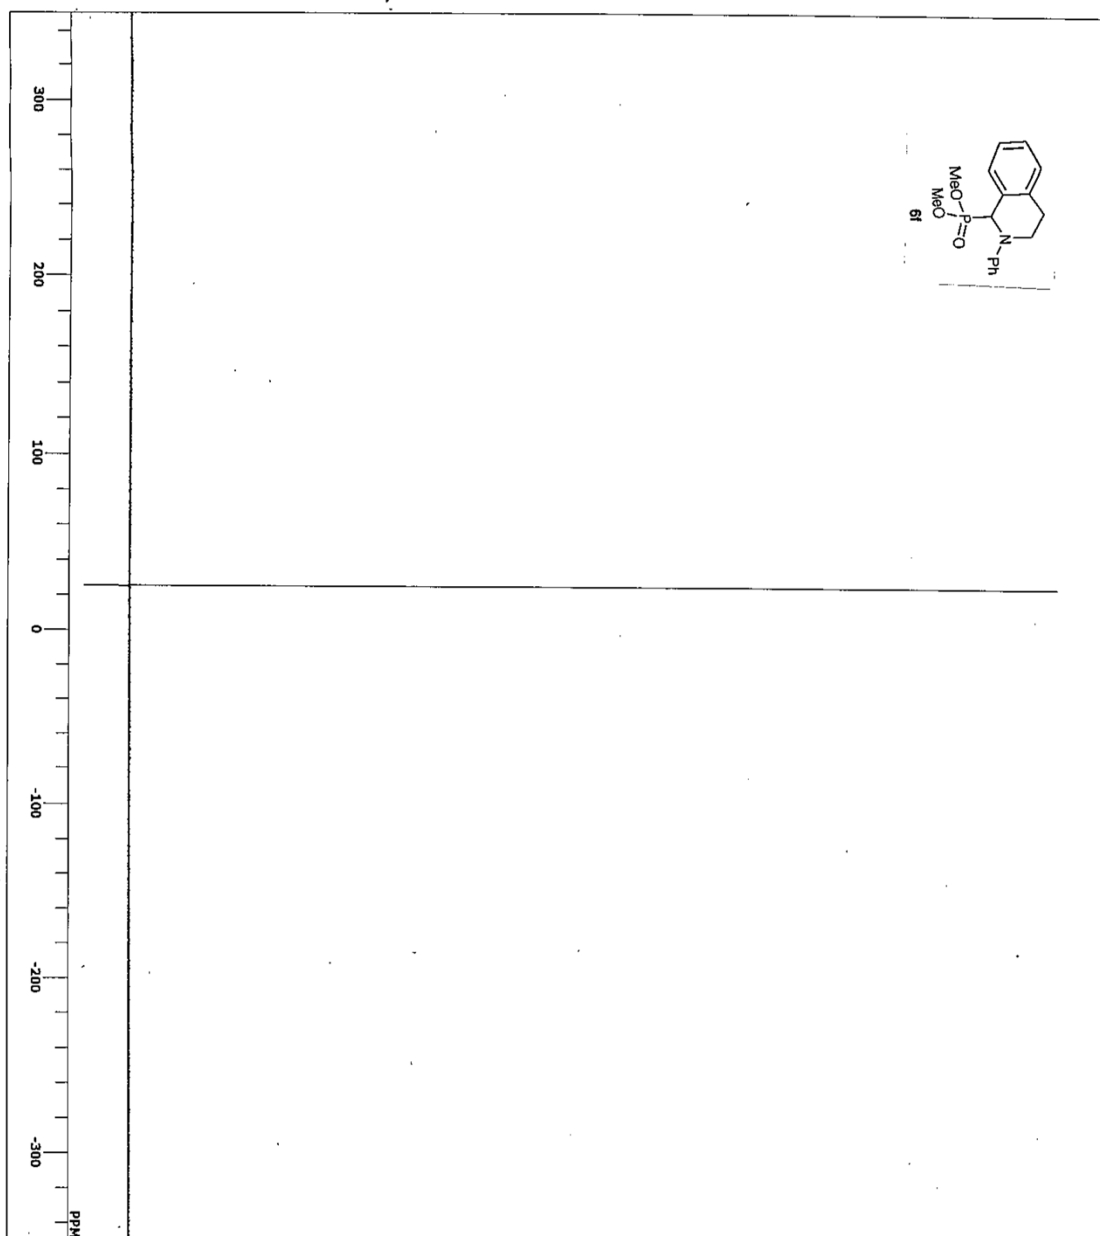

D:\Documents and Settings\Kobayashi\My Desktop\WY-16

|       |                  |                     |
|-------|------------------|---------------------|
| DFILE | COMNT            | 23-07-2013 14:33:40 |
| DATIM | 31P              |                     |
| OBNUC | single_pulse_dec |                     |
| EXMOD | 161.83 MHz       |                     |
| OBFRQ | 4.69 KHz         |                     |
| OBSET | 3.09 Hz          |                     |
| OBFTN | 32768            |                     |
| POINT | 142045.45 Hz     |                     |
| FREQ  | 9                |                     |
| SCANS | 0.2307 sec       |                     |
| ACQTM | 2.0000 sec       |                     |
| PD    | 5.80 usec        |                     |
| INUC  | 1H 408.6 c       |                     |
| CTEMP | CDCl3            |                     |
| SIVNT | 0.00 ppm         |                     |
| EXREF | 0.42 Hz          |                     |
| BF    | 54               |                     |
| RGAIN |                  |                     |



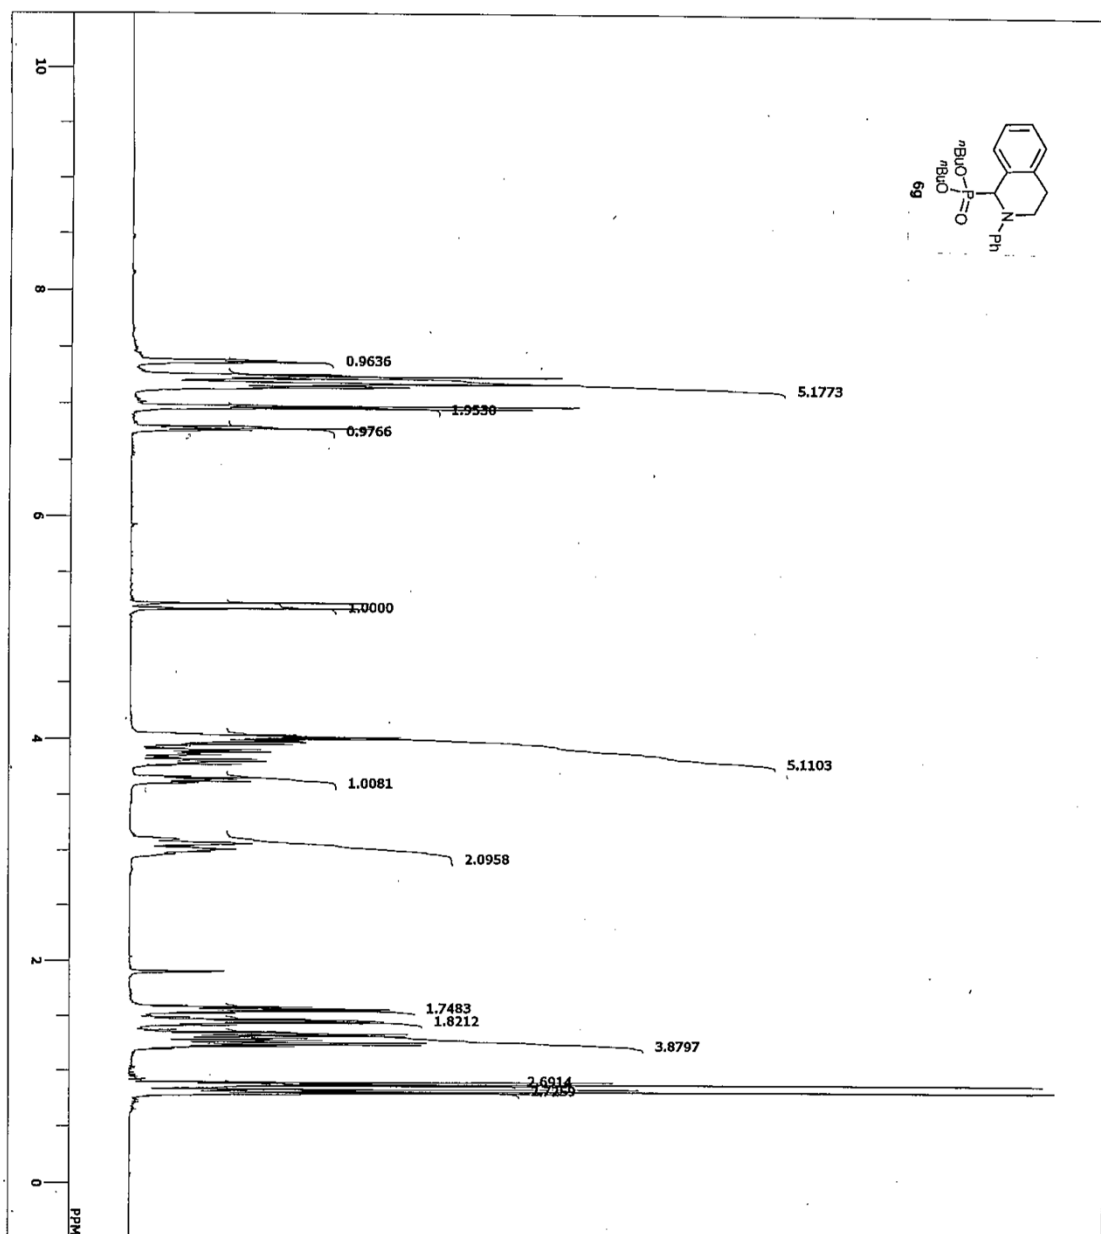

D:\Documents and Settings\Kobayashi\lab\Desktop\WV-16  
 25-07-2013 16:34:31  
 1H  
 single, pulse-ex2  
 399.78 MHz  
 4.12 Hz  
 7.24 Hz  
 14.58 Hz  
 7503.00 Hz  
 8  
 2.1837 sec  
 2.0000 sec  
 6.50 usec  
 408.7 °C  
 CDCl<sub>3</sub>  
 7.24 ppm  
 0.42 Hz  
 Z8  
 RGAIN

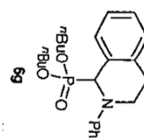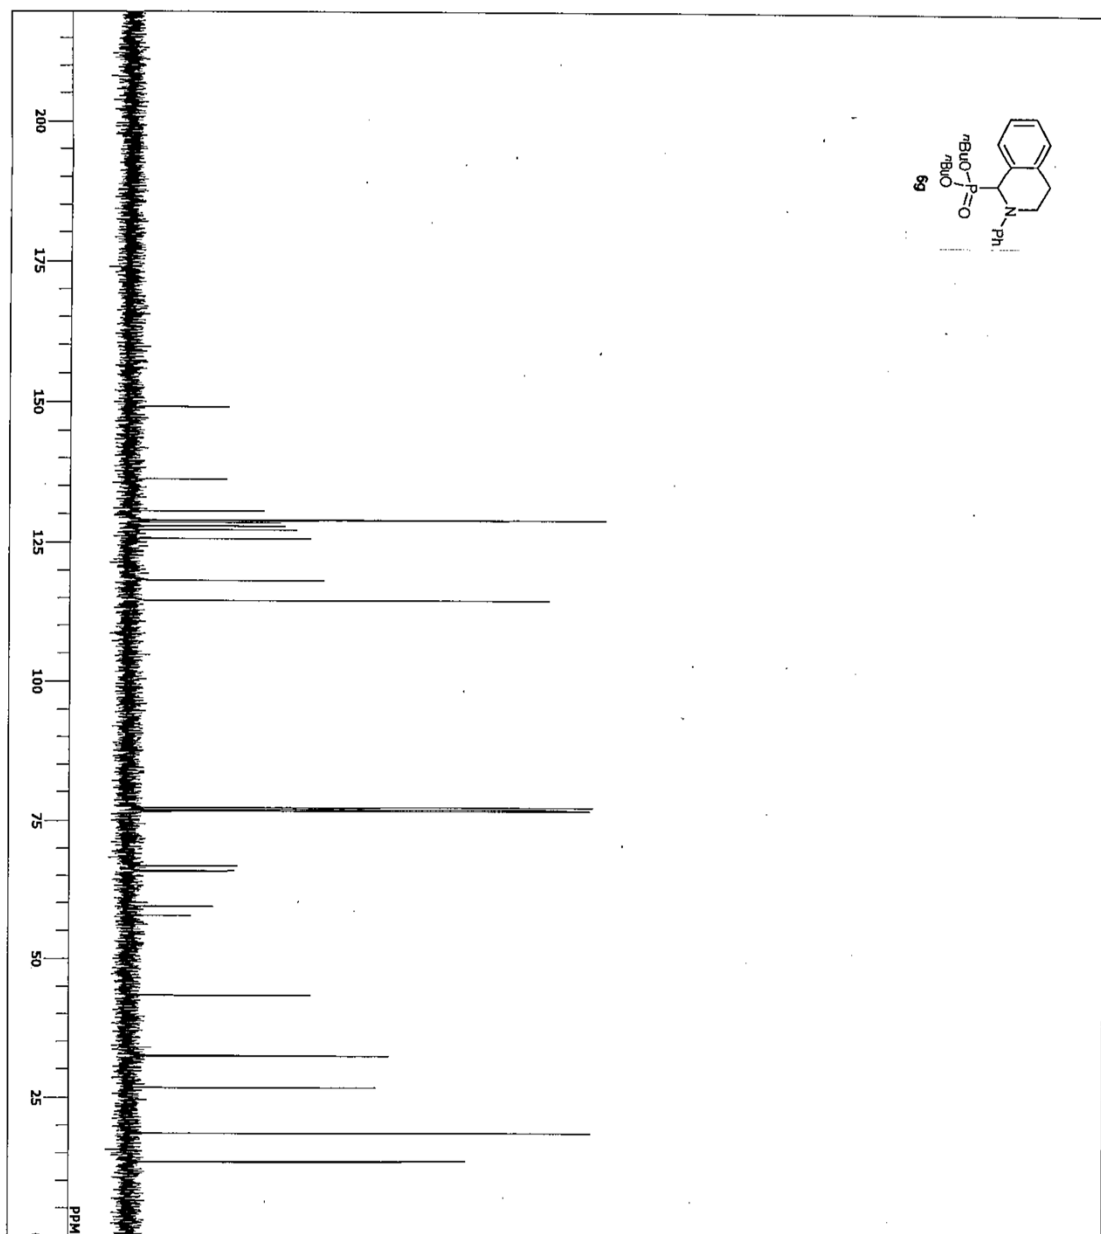

D:\Documents and Settings\Kobayashi\Desktop\WV-16  
 DFILE 25-07-2013 16:40:34  
 CONNT 13C  
 DATIN  
 OBNUC  
 EXMOD Single\_pulse\_dec  
 OBRQ 100.53 MHz  
 OBRF 500 MHz  
 OBRN 500 MHz  
 POINT 32768  
 FREQ 31407.03 Hz  
 SCANS 56  
 ACQTM 1.0433 sec  
 PD 2.0000 sec  
 PW1 3.50 usec  
 TRNUC 1H  
 CTEMP 408.7 c  
 SLVNT CDCl3  
 EXREF 77.00 ppm  
 BF 0.42 Hz  
 RGAIN 60

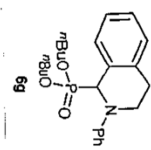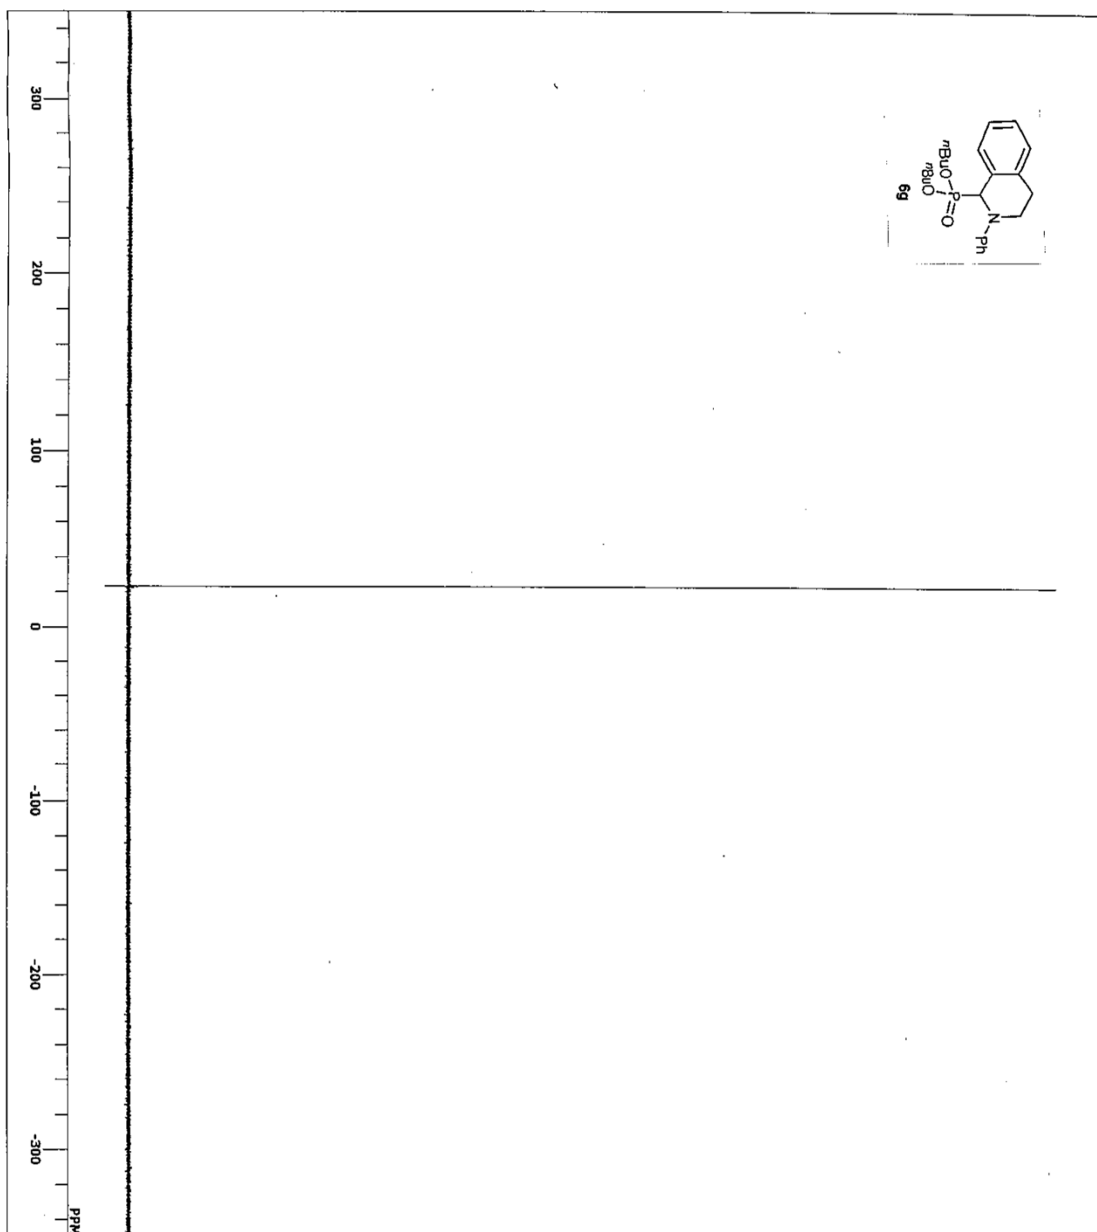

D:\Documents and Settings\Kobayashi\lab\Desktop\WV-16  
 25-07-2013 16:43:04  
 31P  
 single, pulse, dec  
 161.83 MHz  
 4.69 KHz  
 3.09 Hz  
 32768  
 142045.45 Hz  
 5  
 0.2307 sec  
 2.0000 sec  
 5.80 usec  
 1H 408.7 c  
 CDCl3  
 0.00 ppm  
 0.42 Hz  
 54  
 RGAIN

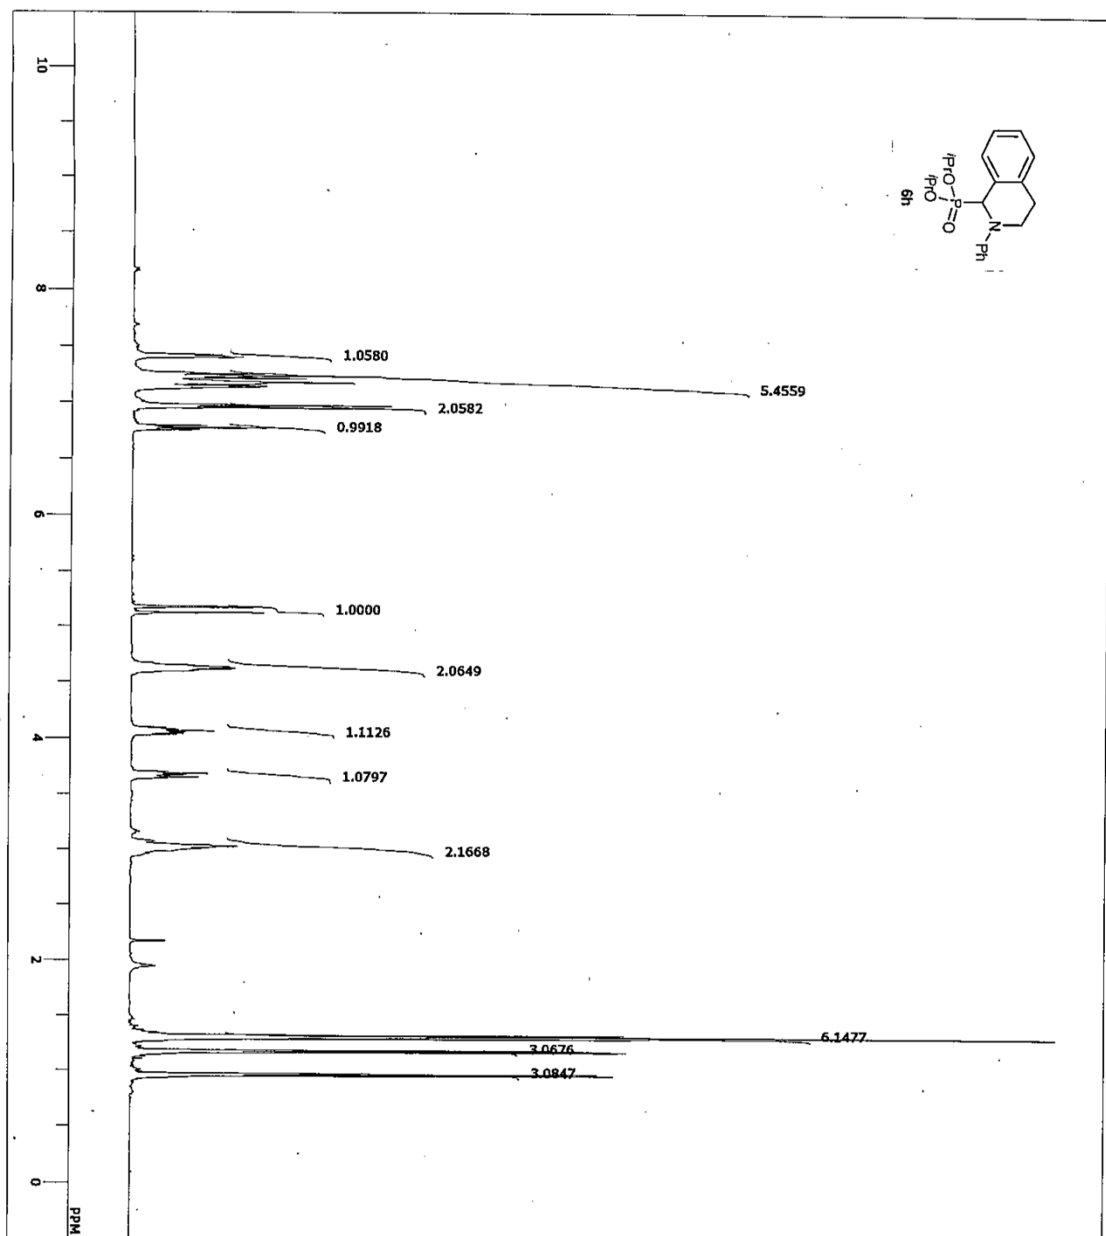

D:\Documents and Settings\Kobayashi\Desktop\WV-16  
 D:\Documents and Settings\Kobayashi\Desktop\WV-16  
 23-07-2013 14:37:04  
 1H  
 single\_pulse.ex2  
 399.78 MHz  
 4.19 KHz  
 7.29 Hz  
 16384  
 7503.00 Hz  
 8  
 2.1637 sec  
 2.0000 sec  
 6.50 usec  
 1H 408.6 c  
 CDCl3  
 7.24 ppm  
 0.42 Hz  
 28  
 RGAIN

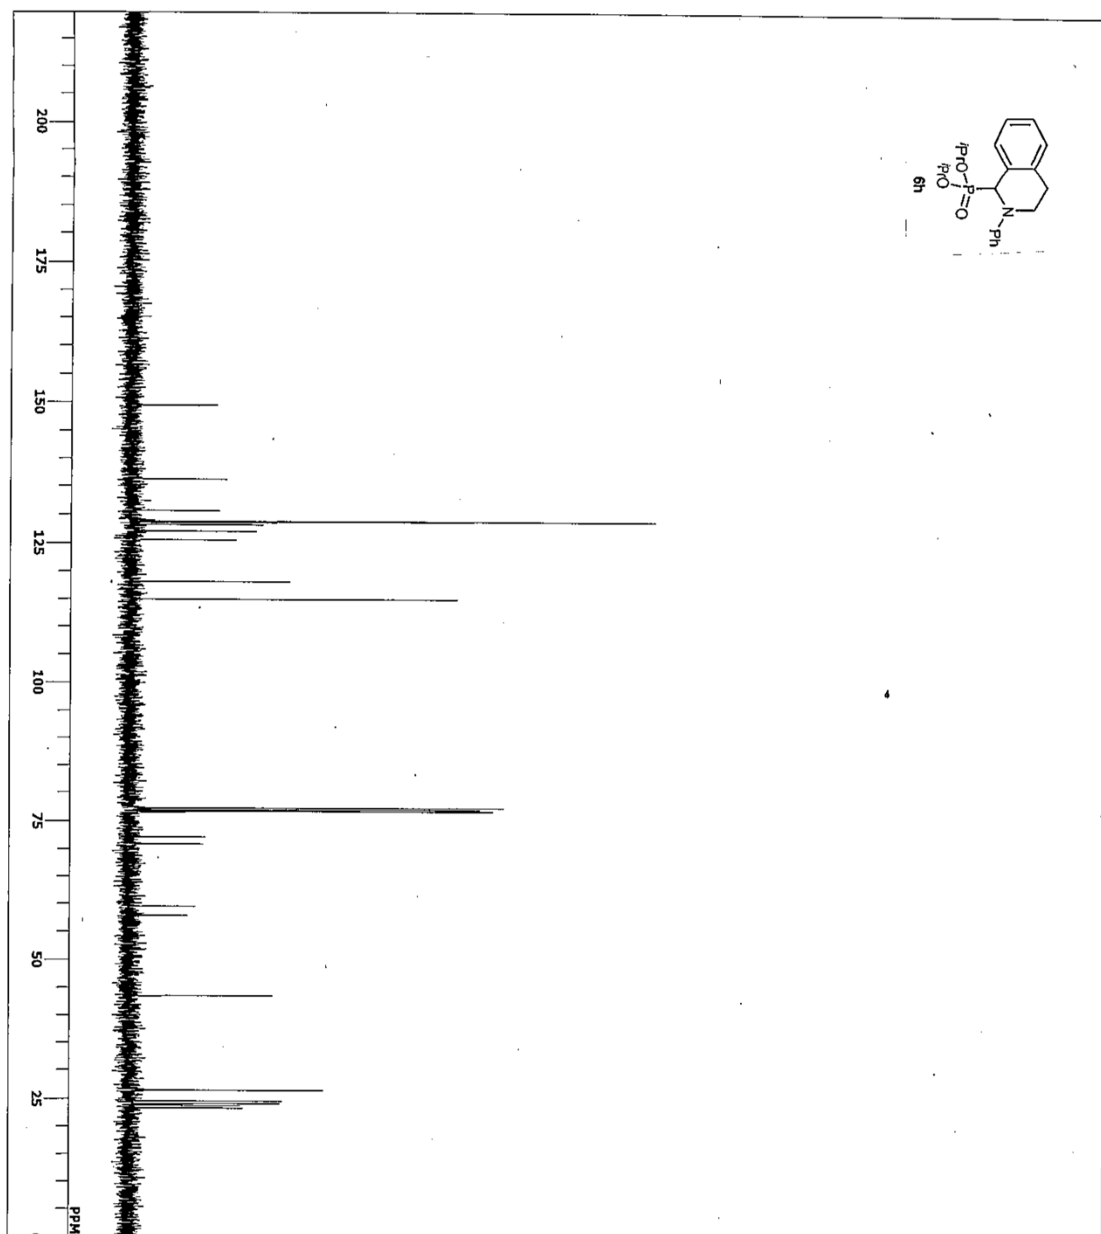

D:\Documents and Settings\Kobayashi\lab\Desktop\WV-16  
 DFILE  
 CONNT 23-07-2013 14:42:33  
 DATE 13C  
 DNAME Single\_pulse\_dec  
 EXPRD 100.53 MHz  
 OBSFQ 5.08 Hz  
 OBSFZ 32758  
 POINT 31407.03 Hz  
 FREQ 45  
 SCANS 1.0433 sec  
 ACQTM 2.0000 sec  
 PD 3.50 usec  
 PUL 1H  
 IRNUC 408.6 c  
 CTEMP CDCL3  
 SLVNT 77.00 ppm  
 EXREF 0.42 Hz  
 BF 60  
 RGAIN

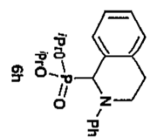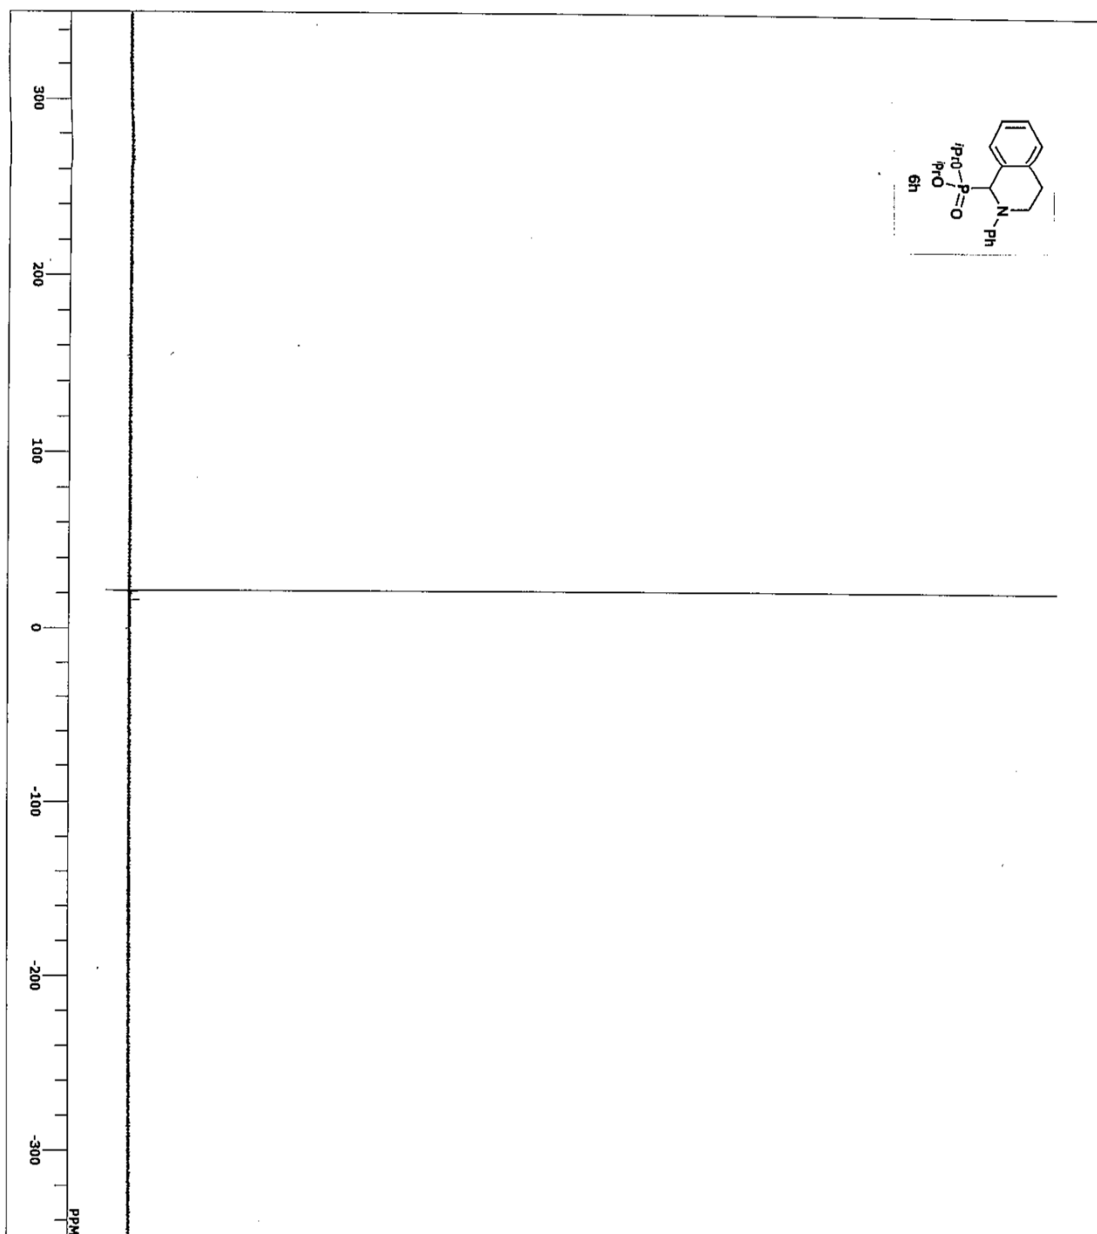

FILE D:\Documents and Settings\Kobayashi\My Desktop\WV-16  
 COUNT 23-07-2013 14:45:39  
 DATUM 31P  
 OBNUC single, pulse, dec  
 EXMOD 161.83 MHz  
 OBFREQ 4.69 KHz  
 OBFET 3.09 Hz  
 POINT 32768  
 FREQU 142045.45 Hz  
 SCANS 11  
 ACQTM 0.2307 sec  
 PD 2.0000 sec  
 PW1 5.80 usec  
 IRNUC 1H  
 CTEMP 408.6 c  
 STVNT CDCL3  
 EXREF 0.00 ppm  
 BF 0.42 Hz  
 RGAIN 54

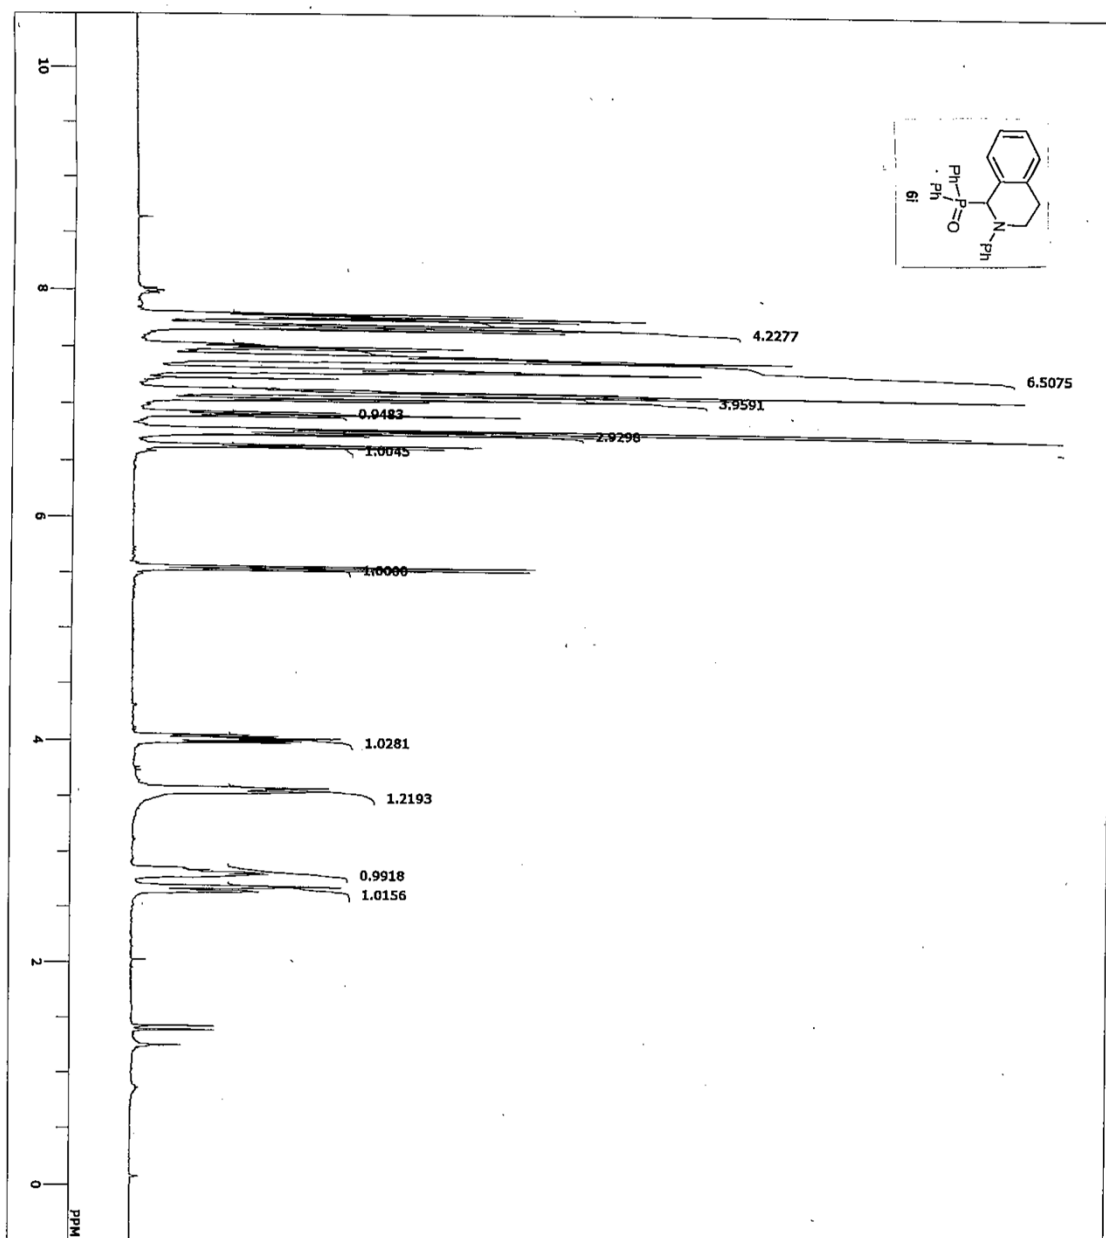

D:\Documents and Settings\Kobayashi\Desktop\WY-16  
 DEFILE  
 COMMENT 27-07-2013 16:41:07  
 DATUM  
 OBNUC 1H  
 EXMOD single, pulse, ex2  
 OBFRQ 399.75 MHz  
 OBSET 4.19 KHz  
 OBFIN 7.29 Hz  
 POINT 16384  
 FREQU 7503.00 Hz  
 SCANS 8  
 ACQTM 2.1837 sec  
 PD 2.0000 sec  
 PUL 6.50 usec  
 INRUC 1H  
 STEMP 408.2 c  
 CDCL3  
 EXREF 7.24 ppm  
 B1 0.12 Hz  
 RGAIN 28

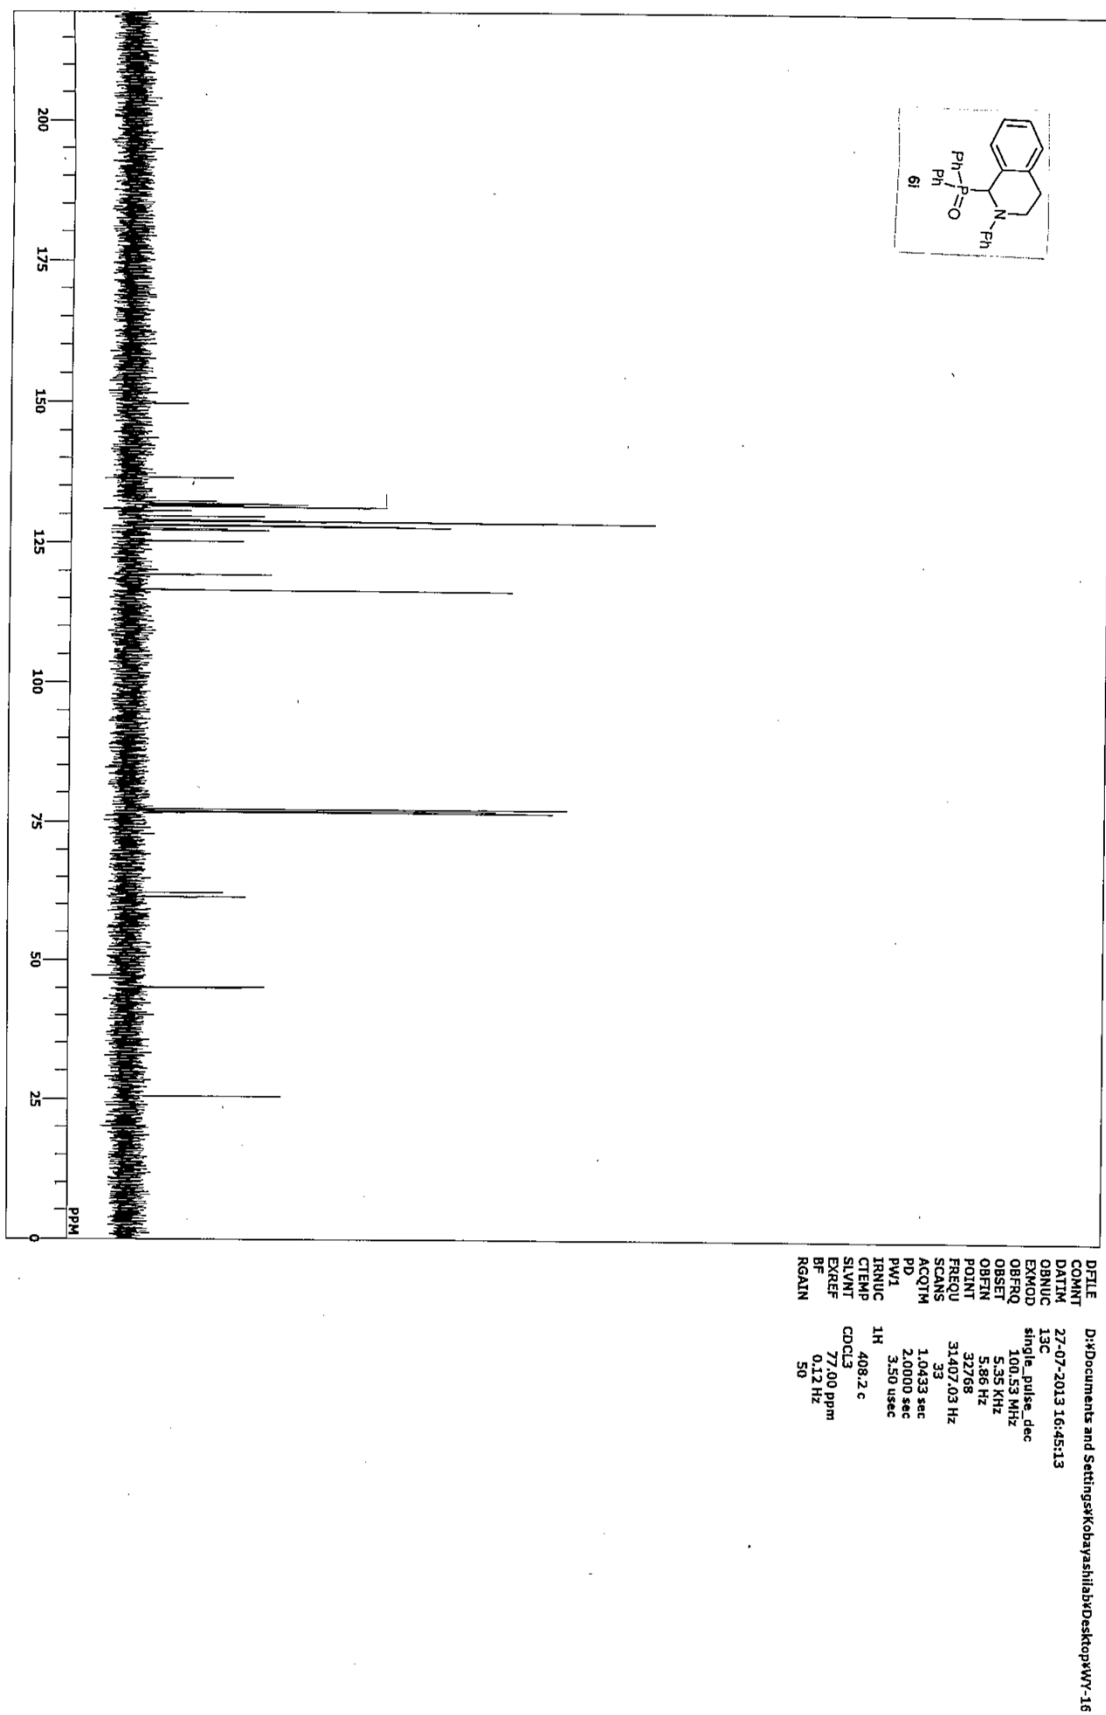



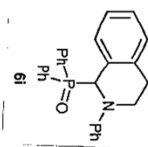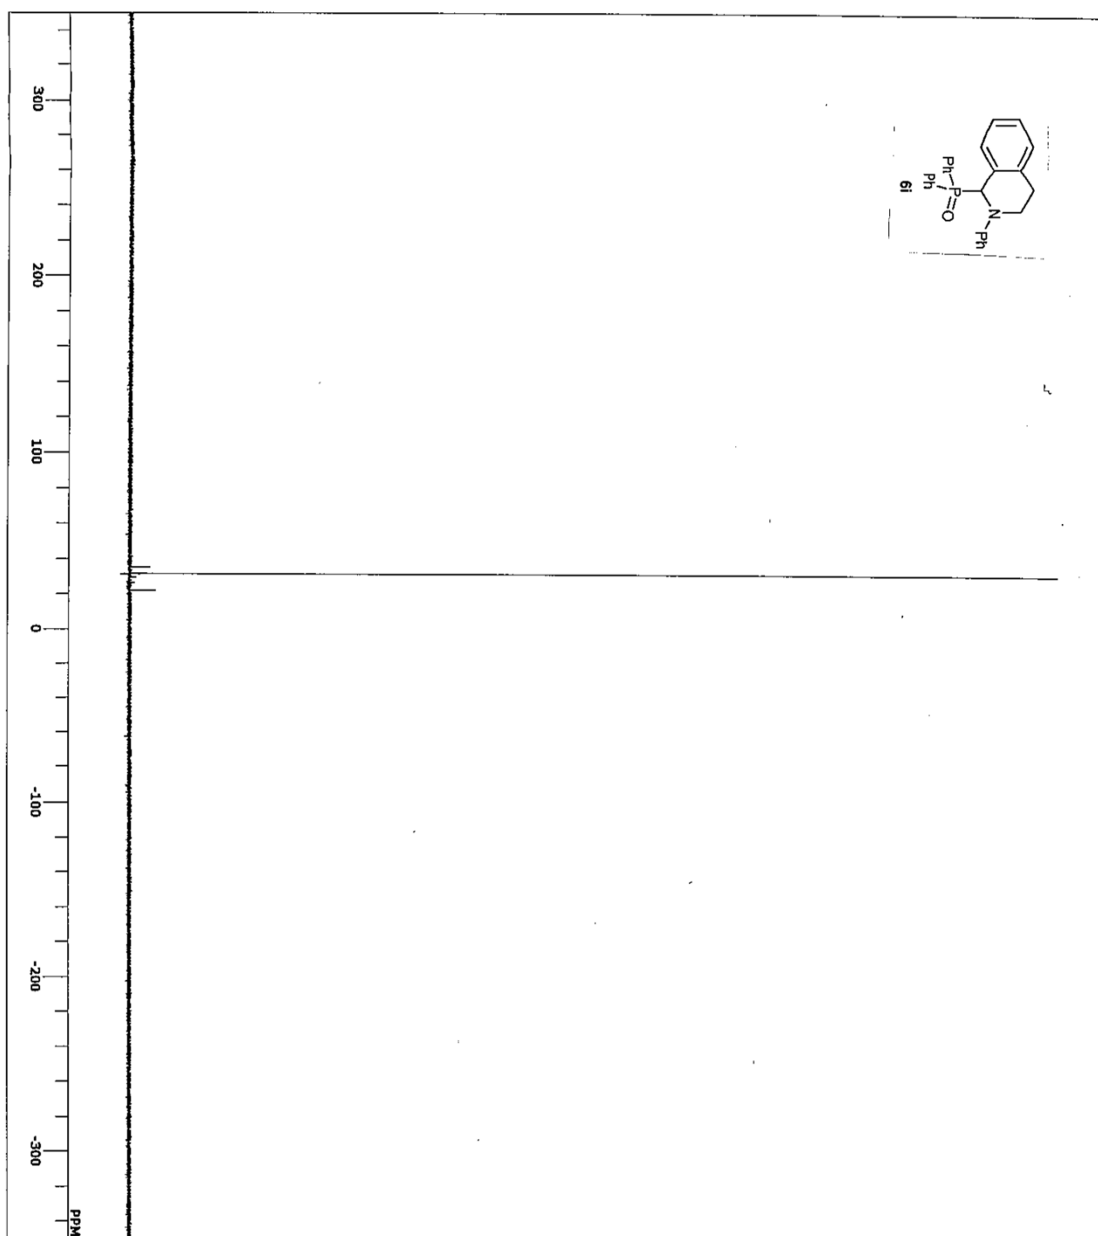

D:\Documents and Settings\Kobayashi\lab\Desktop\WV-16  
 FILE 27-07-2013 16:48:18  
 COUNT 31P  
 DATE 27-07-2013 16:48:18  
 OBNUC single, pulse, dac  
 EXMOD 161.33 MHz  
 OBFREQ 4.69 kHz  
 OBFSET 3.09 Hz  
 OBFEN 32768  
 POINT 142045.45 Hz  
 FREQU 11  
 SCANS 11  
 ACQTM 0.2307 sec  
 PD 2.0000 sec  
 PW1 5.80 usec  
 IRNUC 1H 408.2 c  
 CTEMP 0.000 ppm  
 SOLVT CDCL3  
 SKREF 0.42 Hz  
 RGAIN 50



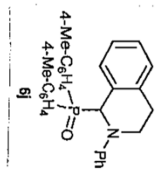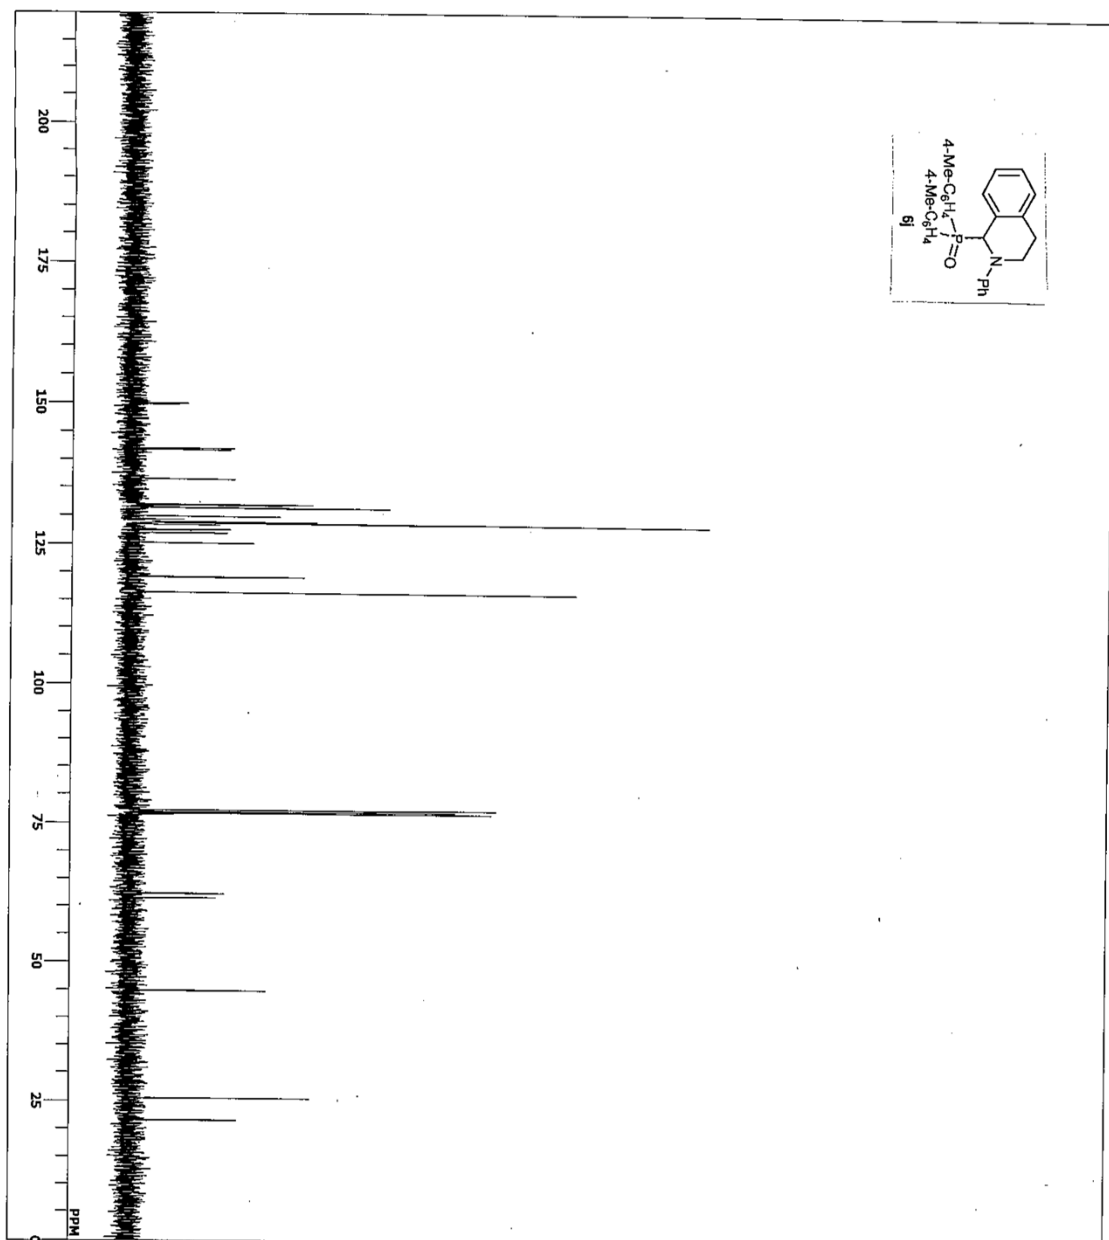

D:\Documents and Settings\Kobayashi\lab\Desktop\WY-16  
 DF16 27-07-2013 16:57:35  
 COMMENT 13C  
 DATE 27-07-2013 16:57:35  
 EXMOD single\_pulse\_dec  
 OBNUC 13C  
 OFREQ 100.63 MHz  
 OBSET 5.35 KHz  
 OFIN 5.86 Hz  
 POINT 32768  
 FREQ 31407.03 Hz  
 SCANS 38  
 ACQIM 1.0433 sec  
 PD 2.0000 sec  
 PW1 3.50 usec  
 TRUNC 1H 408.2 c  
 CHUP C13  
 SUMP 77.00 ppm  
 EXREF 0.12 Hz  
 BF 58  
 RGAIN 58

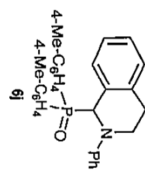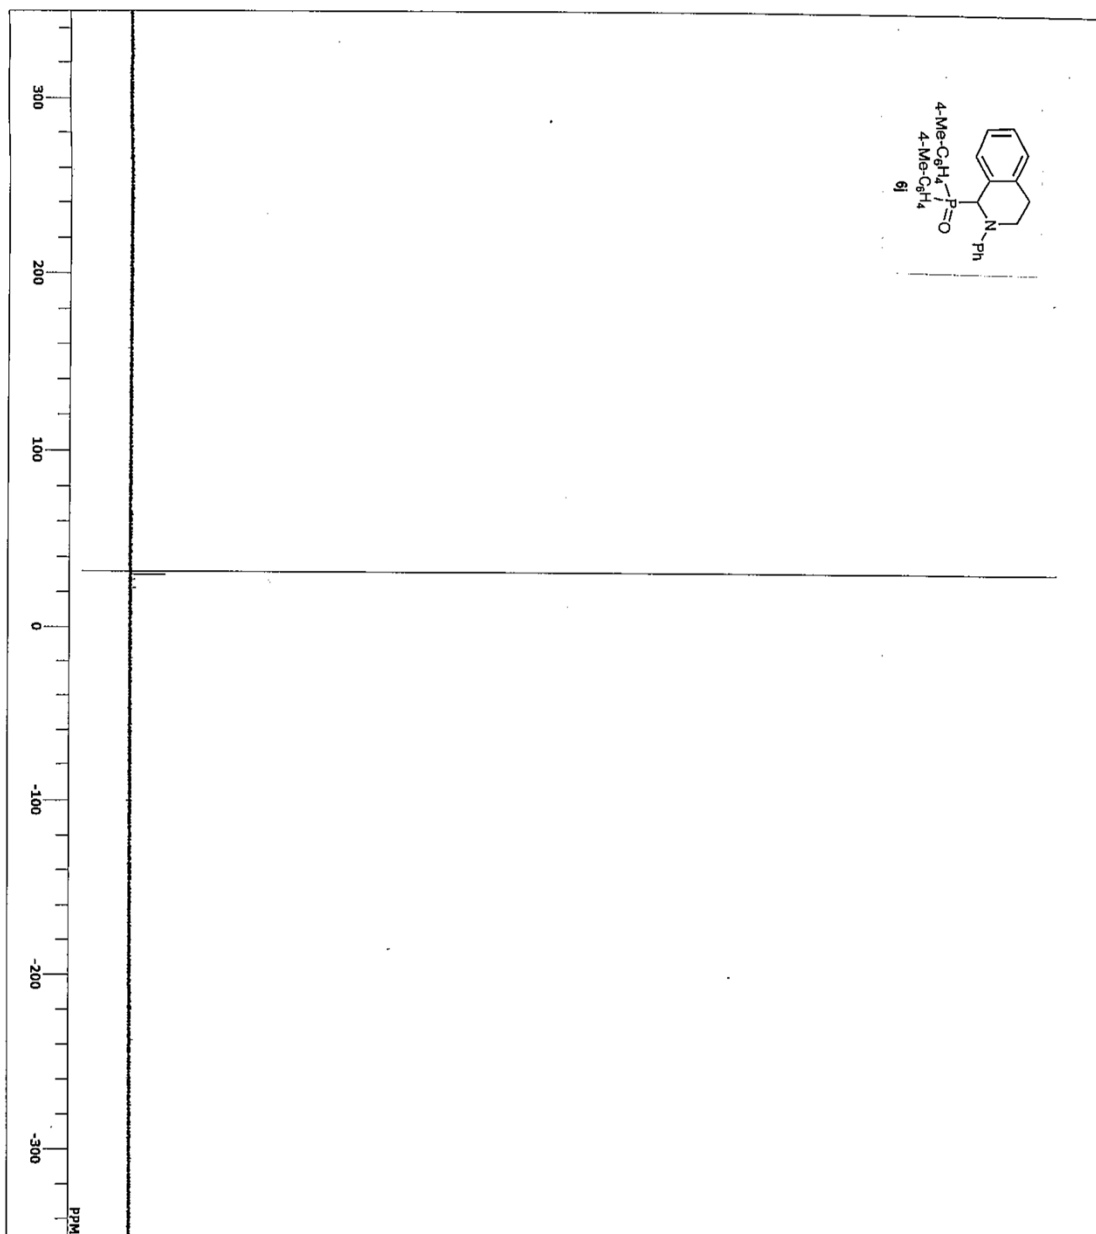

D:\Documents and Settings\Kobayashi\lab\Oasktop\WV-16  
 CONT 27-07-2013 17:00:55  
 DATIM 31P  
 OBNUC single\_pulse\_dec  
 EXMOD 161.83 MHz  
 OBFRQ 4.69 kHz  
 OBSET 3.09 Hz  
 OBFIN 32768  
 POINT 142045.45 Hz  
 FREQU 6  
 SCANS 0.2307 sec  
 ACQTM 2.0000 sec  
 PD 5.80 usec  
 PW1 1H 408.2 c  
 TRNUC CDCL3  
 GTEMP 0.00 ppm  
 SLENT 0.02 Hz  
 EXREF 54  
 RGAIN

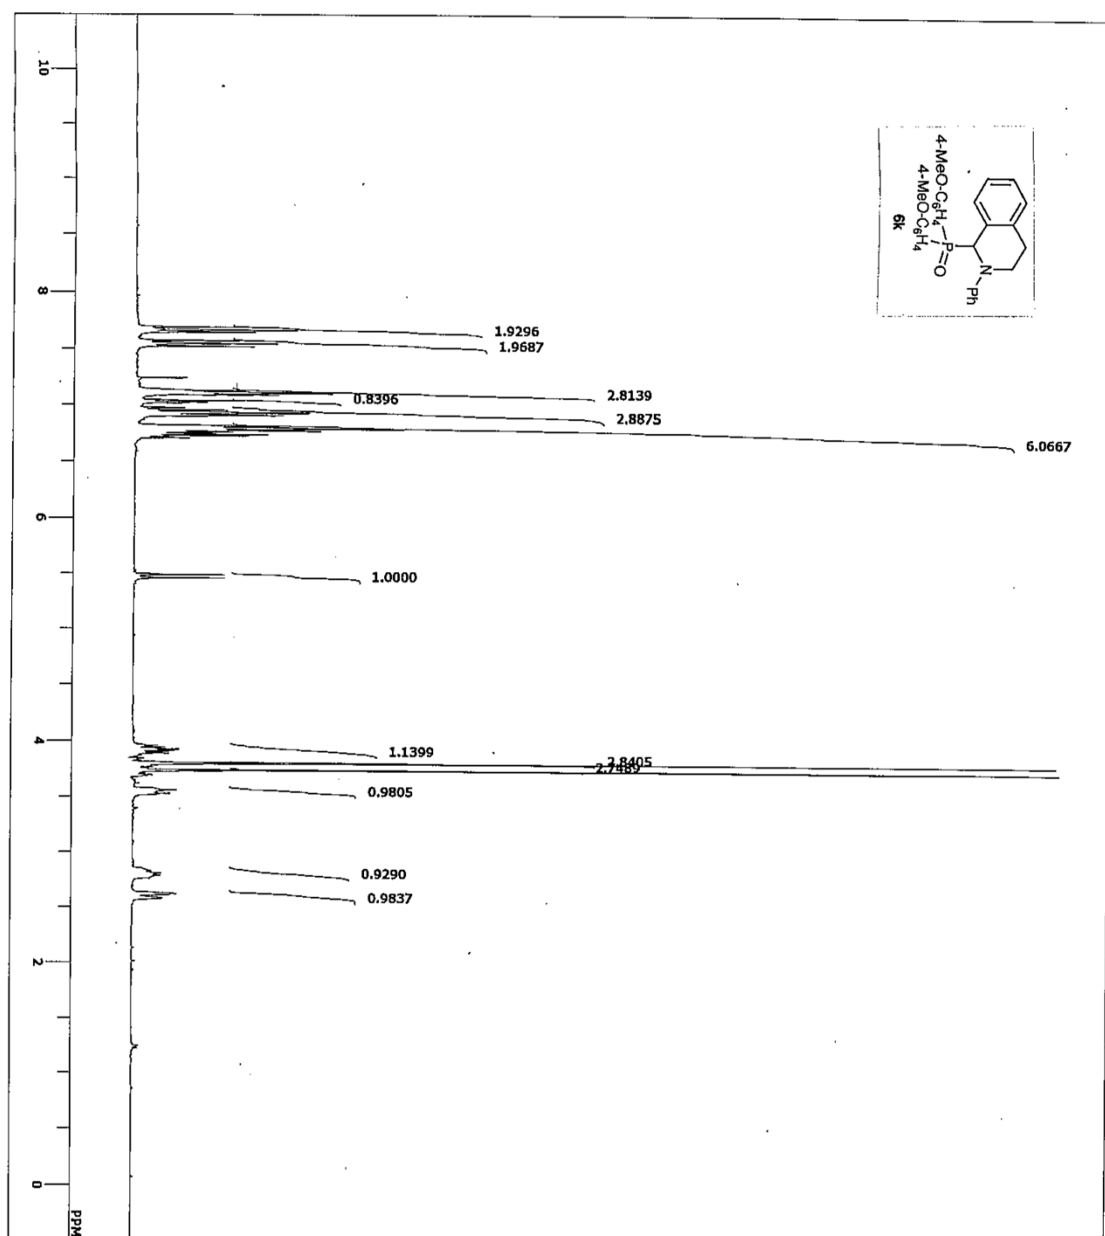

D:\Documents and Settings\Kobayashi\My Desktop\WY-16  
 D:\Documents and Settings\Kobayashi\My Desktop\WY-16  
 27-07-2013 17:05:08  
 1H  
 single\_pulse.ac2  
 399.78 MHz  
 4.19 KHz  
 7.29 Hz  
 16384  
 7503.00 Hz  
 8  
 2.1837 sec  
 2.0000 sec  
 6.50 usec  
 1H 408.2 c  
 CDCl3  
 7.24 ppm  
 0.2 Hz  
 28

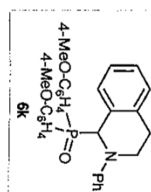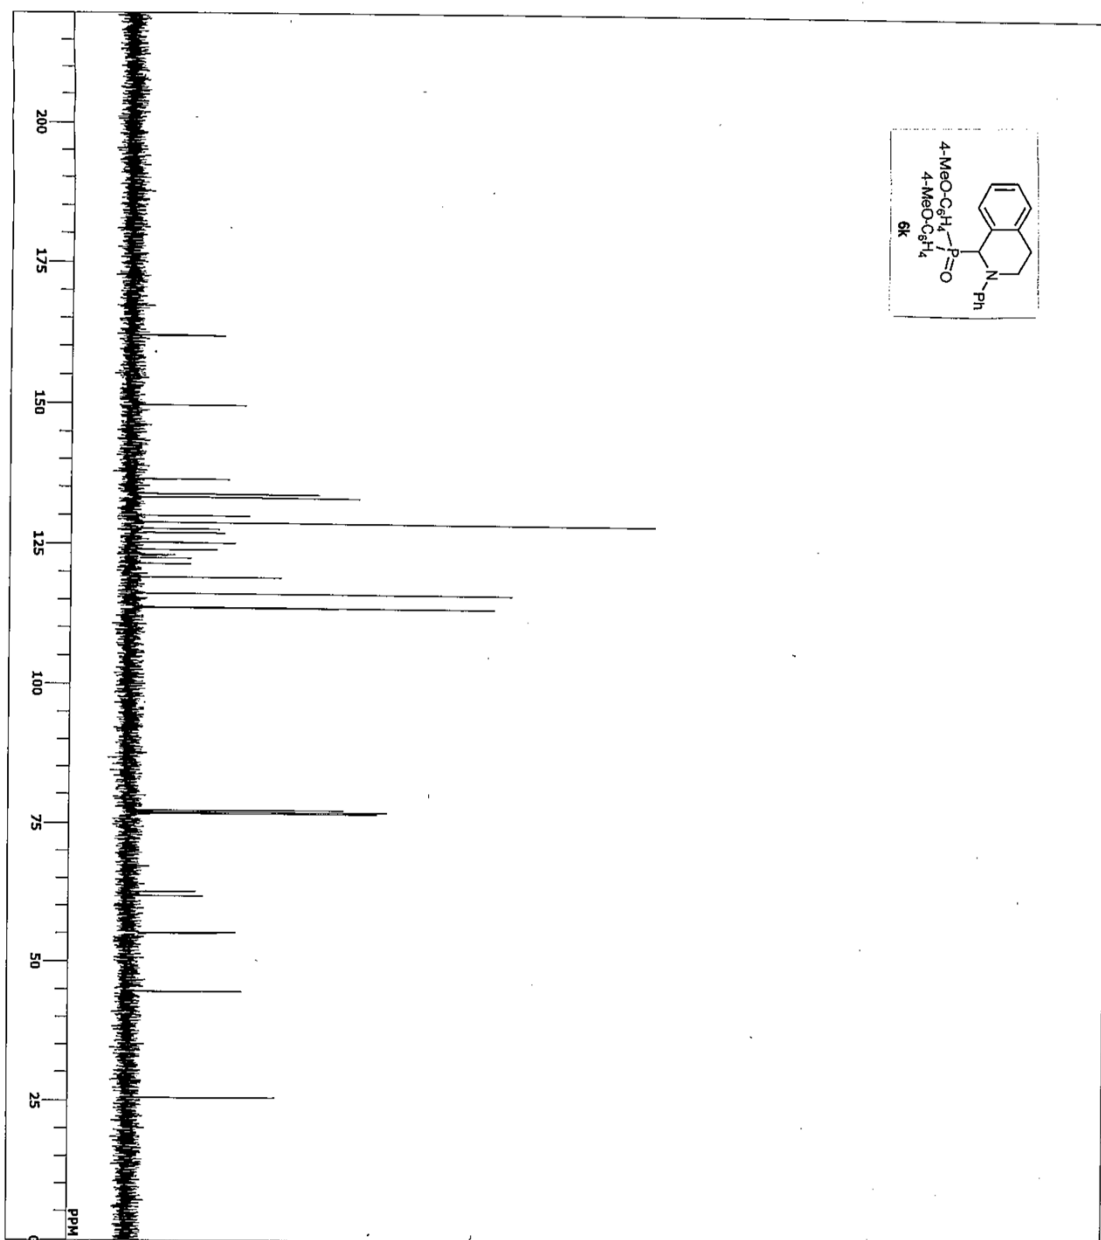

DFILE D:\Documents and Settings\Kobayashi\My Desktop\WY-16  
 COMMENT 27-07-2013 17:09:58  
 DATIM 13C  
 OBNUC single\_pulsa\_dec  
 EXMOD 100.53 MHz  
 OBFREQ 5.35 KHz  
 OBSET 5.86 Hz  
 OBFIN 32768  
 POINT 31407.03 Hz  
 FREQU 36  
 SCANS 1.0433 sec  
 ACQTM 2.0000 sec  
 PD 3.50 usec  
 PWT 1H 408.2 c  
 INRUC  
 TRIMP  
 STIMP 77.00 ppm  
 SUNIT  
 EXREF 0.12 Hz  
 BF 56  
 RGAIN

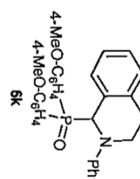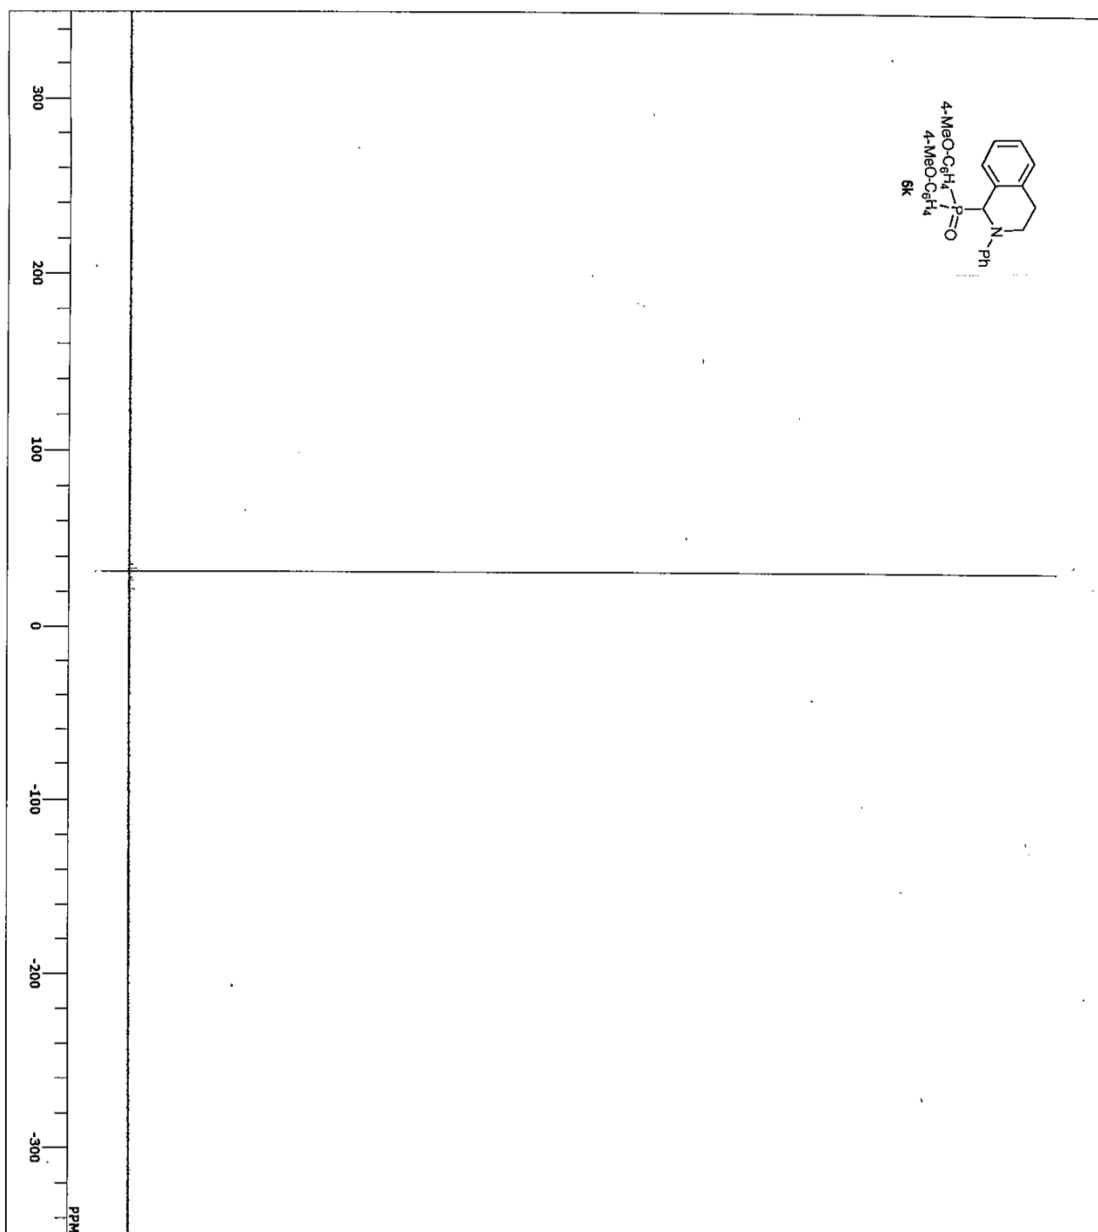

D:\Documents and Settings\Kobayashi\My Desktop\WV-16  
 COUNT 31P  
 DATE 27-07-2013 17:13:04  
 ORNUC single, pulse, dec  
 EXMOD 161.83 MHz  
 OFREQ 4.69 kHz  
 OBSET 3.09 Hz  
 OBENT 32768  
 POINT 142045.45 Hz  
 FREQU 10  
 SCANS 10  
 ACQTM 0.2307 sec  
 PD 2.0000 sec  
 PW1 5.80 usec  
 IRNUC 1H  
 CTEMP 408.2 c  
 SLEW CDCL3  
 EXREF 0.00 ppm  
 BR 0.42 Hz  
 RGAIN S4

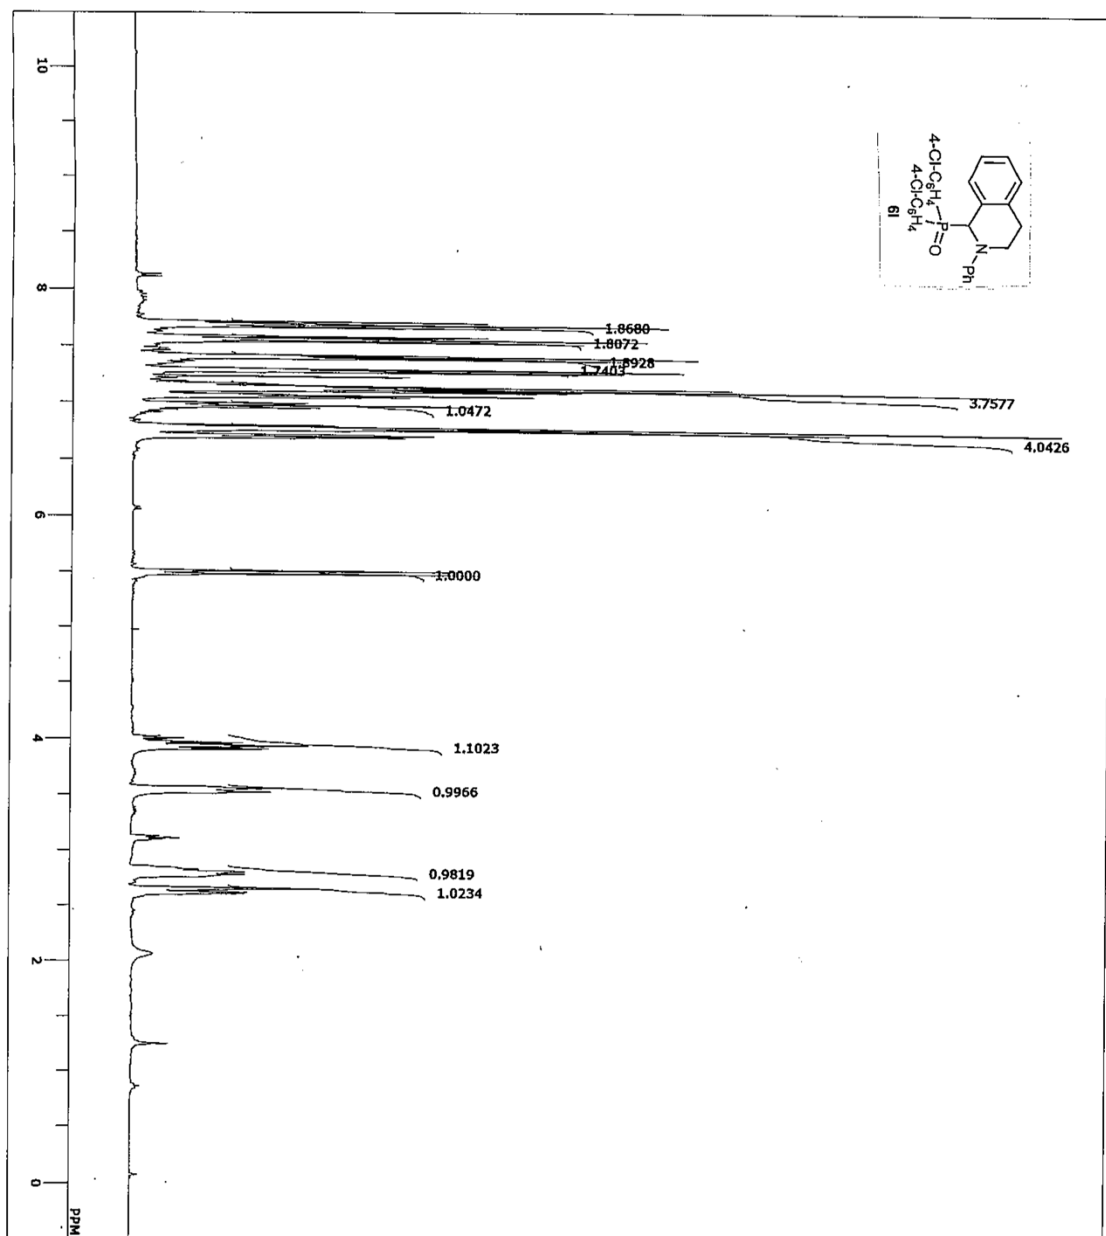

D:\Documents and Settings\kobayashilab\Desktop\WY-1619-1H.2  
 FILE 14-08-2013 14:44:26  
 COMNT 1H  
 DATIM 1H  
 OBNUC single\_pulse.ex2  
 EXMOD 399.76 MHz  
 OBFRQ 4.19 KHz  
 OBSET 7.29 Hz  
 POINT 16384  
 PREQU 7503.00 Hz  
 SCANS 8  
 SFOQIM 2.1837 sec  
 PUL1 2.0000 sec  
 IRNUC 6.50 usec  
 CTMP 1H 400.8 c  
 SLVT CDCL3  
 EXREF 7.24 ppm  
 BF 0.12 Hz  
 RGAIN 28



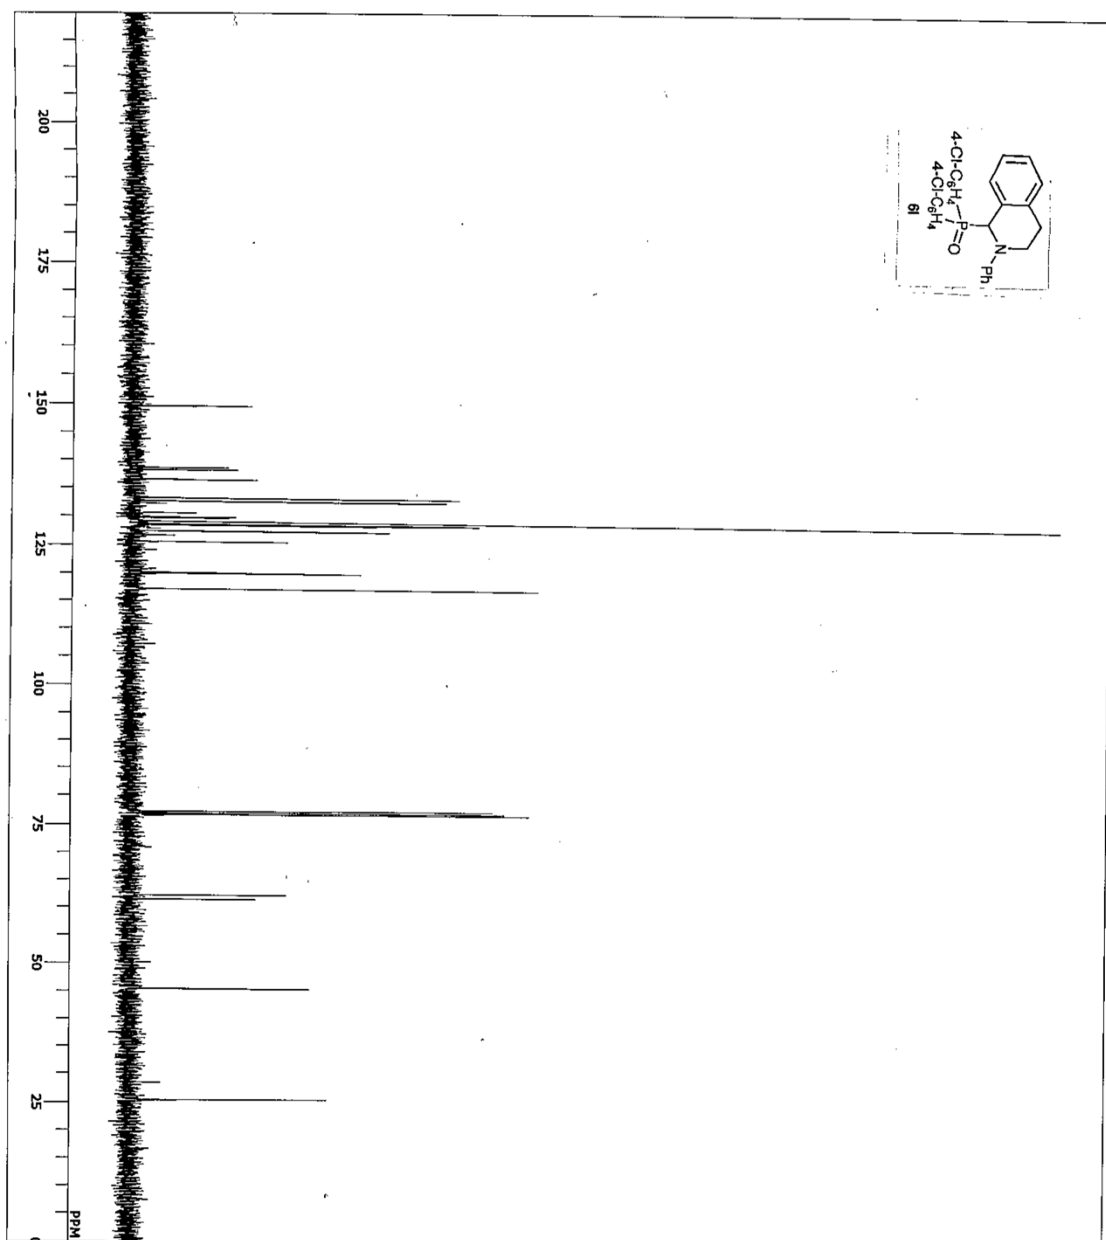

D:\Documents and Settings\Kobayashi\lab\Desktop\WY-16  
 DFILE  
 COMNT 14-08-2013 14:50:35  
 DATIM 13C  
 OBNUC single\_pulse\_dec  
 EXMOD 100.53 MHz  
 OBFREQ 5.35 KHz  
 OBFEN 5.86 Hz  
 POINT 32768  
 FREQ 31407.03 Hz  
 SCANS 71  
 ACQTM 1.0633 sec  
 PUL 2.0000 sec  
 PM1 3.50 usec  
 IRNUC 1H 401.2 c  
 CTMP C13  
 SLVT 77.00 ppm  
 EXREF 0.12 Hz  
 BF 56  
 RGAIN

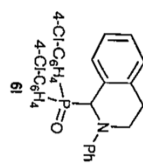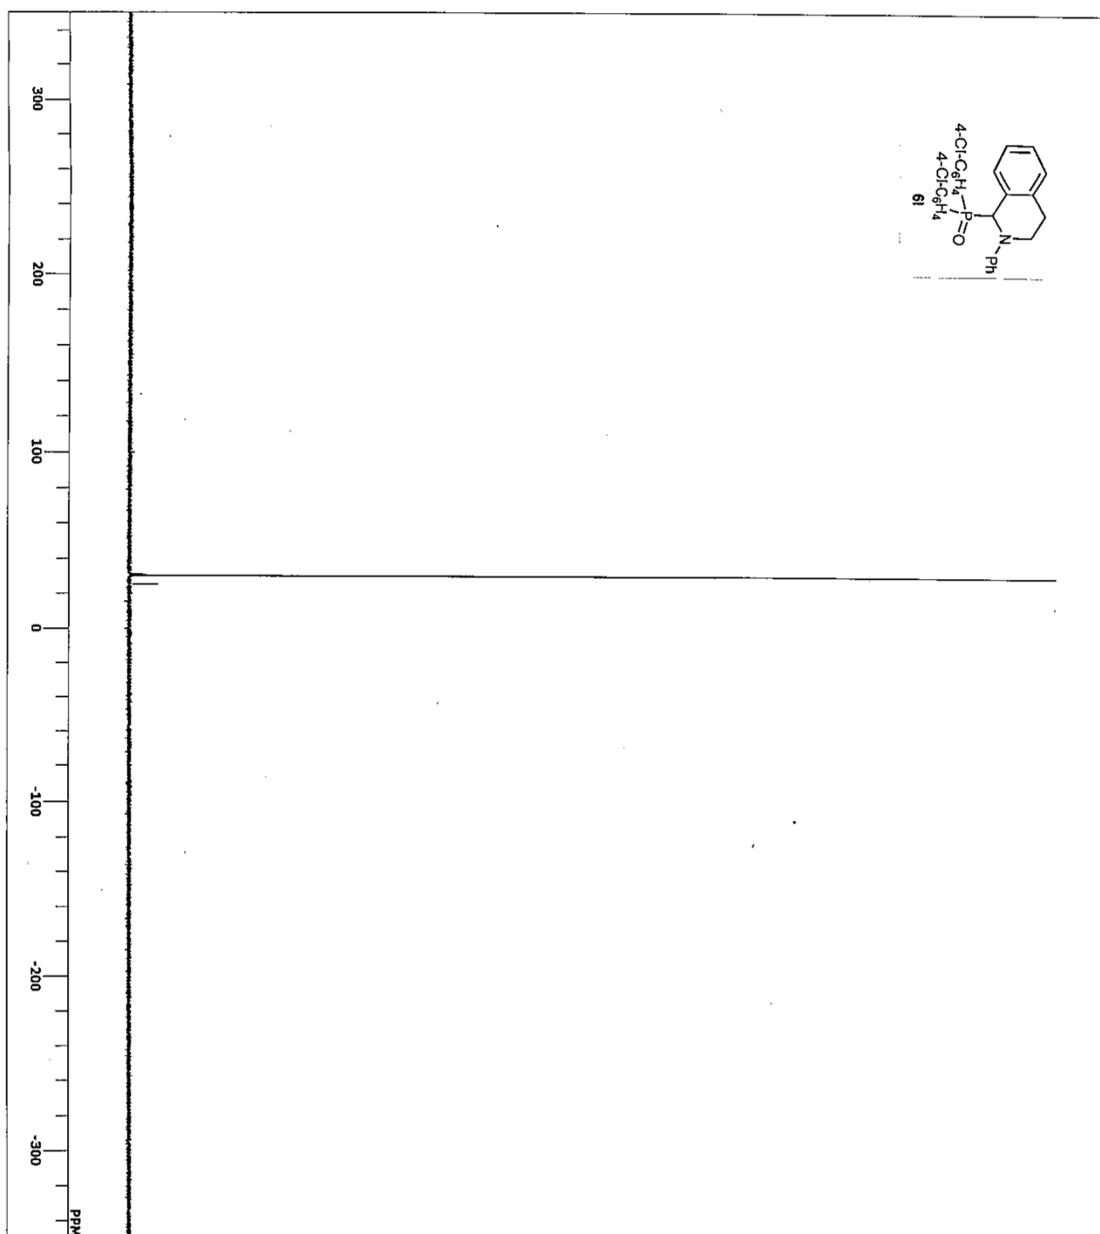

FILE D:\Documents and Settings\Kobayashi\lab\Desktop\WVY-16  
 COUNT 31P  
 DATE 14-08-2013 14:53:41  
 ORNUC 31P  
 EXMOD single, pulse, dac  
 OBSFQ 161.83 MHz  
 OBSRT 4.69 kHz  
 OBSIN 3.09 Hz  
 POINT 32768  
 FREQU 142045.45 Hz  
 SCANS 11  
 ACQTM PD 0.2307 sec  
 PD 2.0000 sec  
 PW1 5.80 usec  
 IRNUC 1H  
 CTEMP 401.5 c  
 SOLVT CDCl3  
 EXREF 0.000 ppm  
 B1 0.42 Hz  
 RGAIN 54

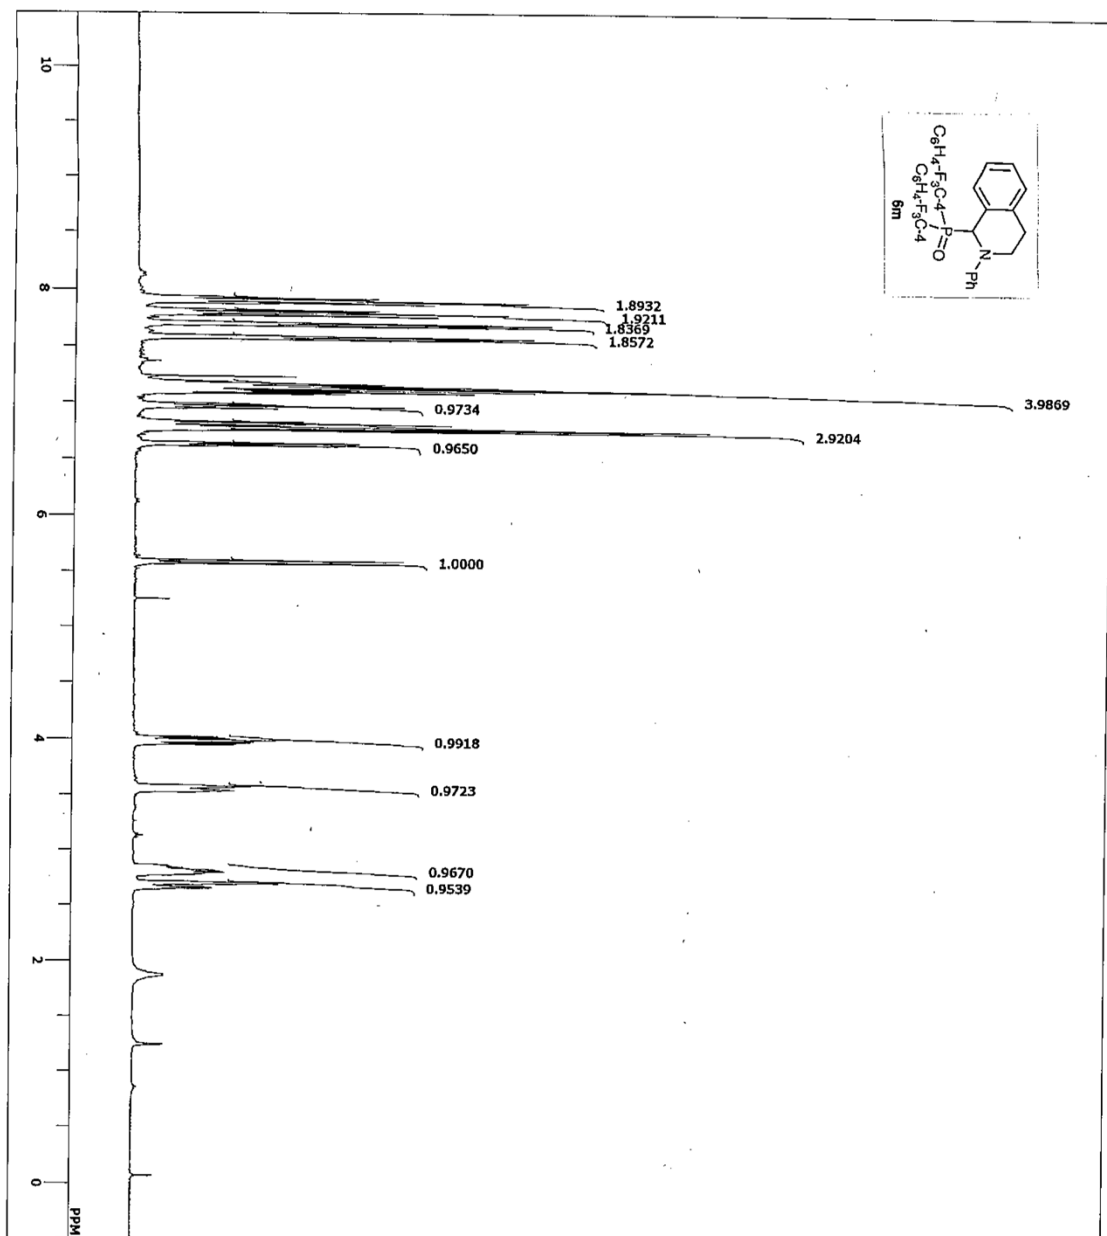

DFTL D:\Documents and Settings\skolayashlab\Desktop\WY-16  
 COMNT 09-08-2013 09:41:16  
 DATIM 1H  
 OBNUC single\_pulse.ac2  
 EXMOD 399.78 MHz  
 OBFREQ 4.19 KHz  
 OBFIN 7.29 Hz  
 POINT 16384  
 FREQU 7503.00 Hz  
 SCANS 8  
 ACQTM 2.1837 sec  
 PD 2.0000 sec  
 PUL 6.50 usec  
 IRNUC 1H 400.8 c  
 CTEMP CDCL3  
 SLENT 7.24 ppm  
 SREF 0.12 Hz  
 RGAIN 32

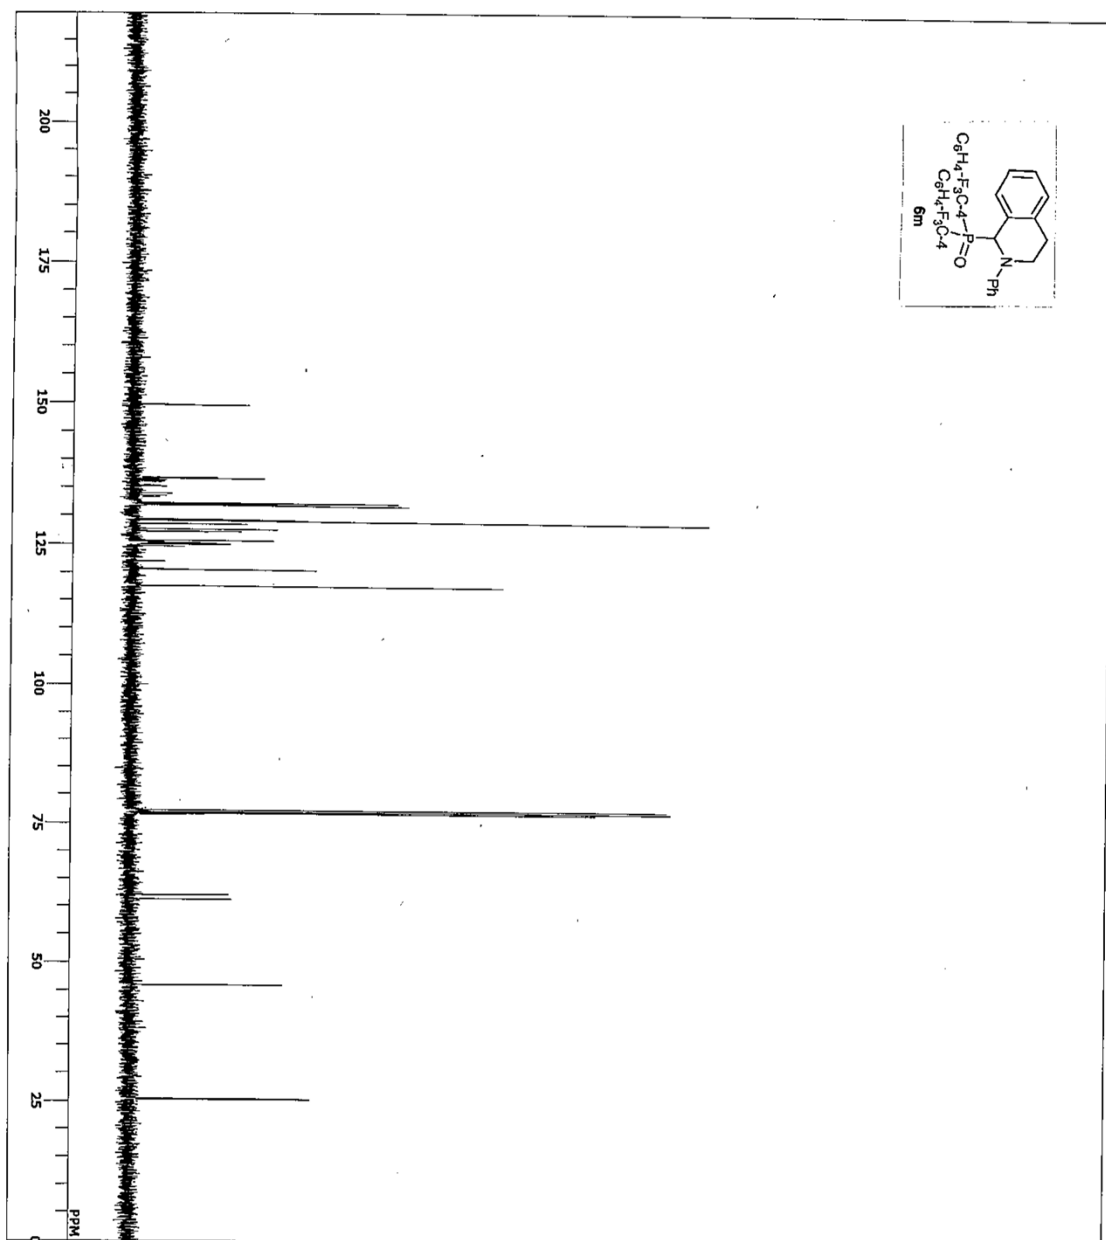

DFILE D:\Documents and Settings\Kobayashi\lab\Desktop\WY-16  
 COMMENT 09-08-2013 09:55:19  
 DATIM 13C  
 OBNUC single\_pulse\_dec  
 EXMOD 100.53 MHz  
 OBRQ 5.35 KHz  
 OBRF 5.86 Hz  
 POINT 32768  
 FREQ 31407.03 Hz  
 SCANS 234  
 ACQTM 1.0433 sec  
 PM1 2.0000 sec  
 PM2 3.50 usec  
 IRNUC 1H 402.0 c  
 CTMP CIRC3  
 SLYNT 77.00 ppm  
 EXREF 0.12 Hz  
 BF 56  
 RGAIN 56

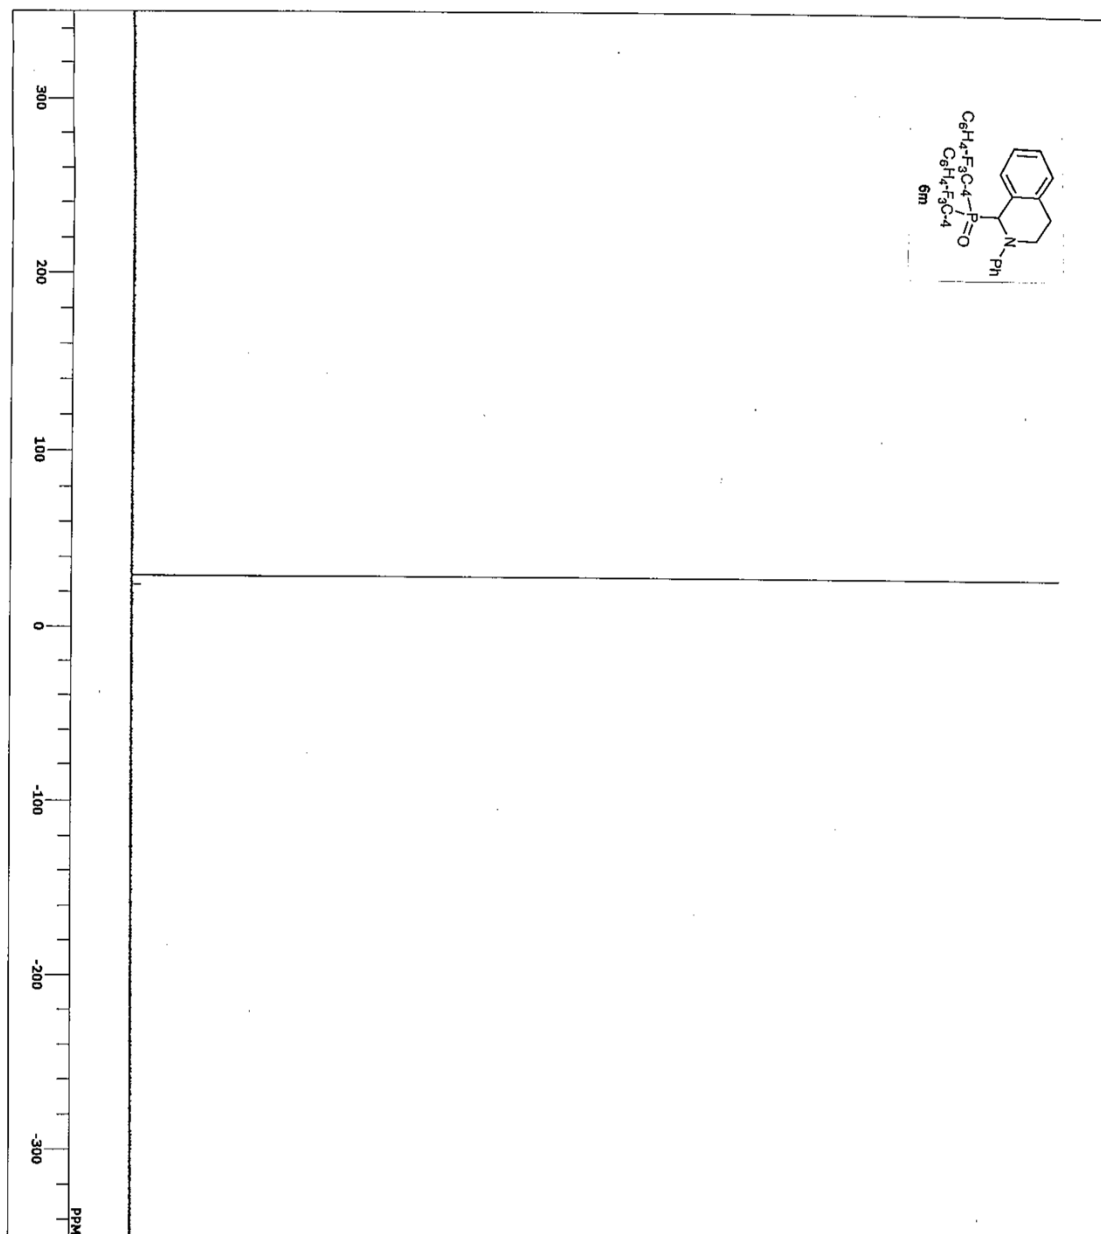

FILE D:\Documents and Settings\Kobayashi\lab\Desktop\KWT-16  
 COUNT 31P  
 DATE 09-08-2013 09:59:48  
 NAME 31P  
 EXMOD single, pulse, dec  
 OBSFREQ 161.83 MHz  
 OBSFREQ 4.69 KHz  
 OBSFREQ 3.09 Hz  
 POINT 32768  
 FREQU 142045.45 Hz  
 SCANS 61  
 ACQTM 0.2307 sec  
 PD 2.0000 sec  
 PW1 5.80 usec  
 IRNUC 1H  
 CTMP 402.4 c  
 SILVT CDCl3  
 EXREF 0.00 ppm  
 BF 0.42 Hz  
 RGAIN 55

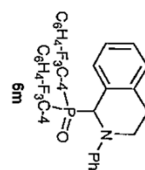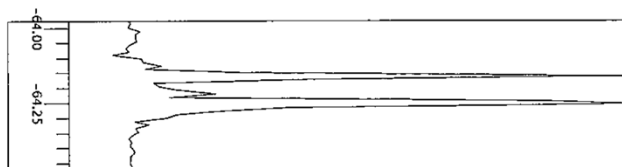

FILE D:\Documents and Settings\Kobayashi\lab\Desktop\WV-16  
 COUNT 09-08-2013 10:03:20  
 DATE 19F  
 OBNUC single, pulse man  
 EXMOD 376.13 MHz  
 OBSER 3.43 KHz  
 OBSIN 6.82 Hz  
 POINT 32768  
 FREOU 142045.45 Hz  
 SCANS 8  
 ACQTM 0.2307 sec  
 PD 7.0000 sec  
 PW1 6.70 usec  
 IRNUC 19F  
 CTMP 402.7 c  
 SLVNT CDCl3  
 EXREF -64.16 ppm  
 BF 0.12 Hz  
 RGAIN 50

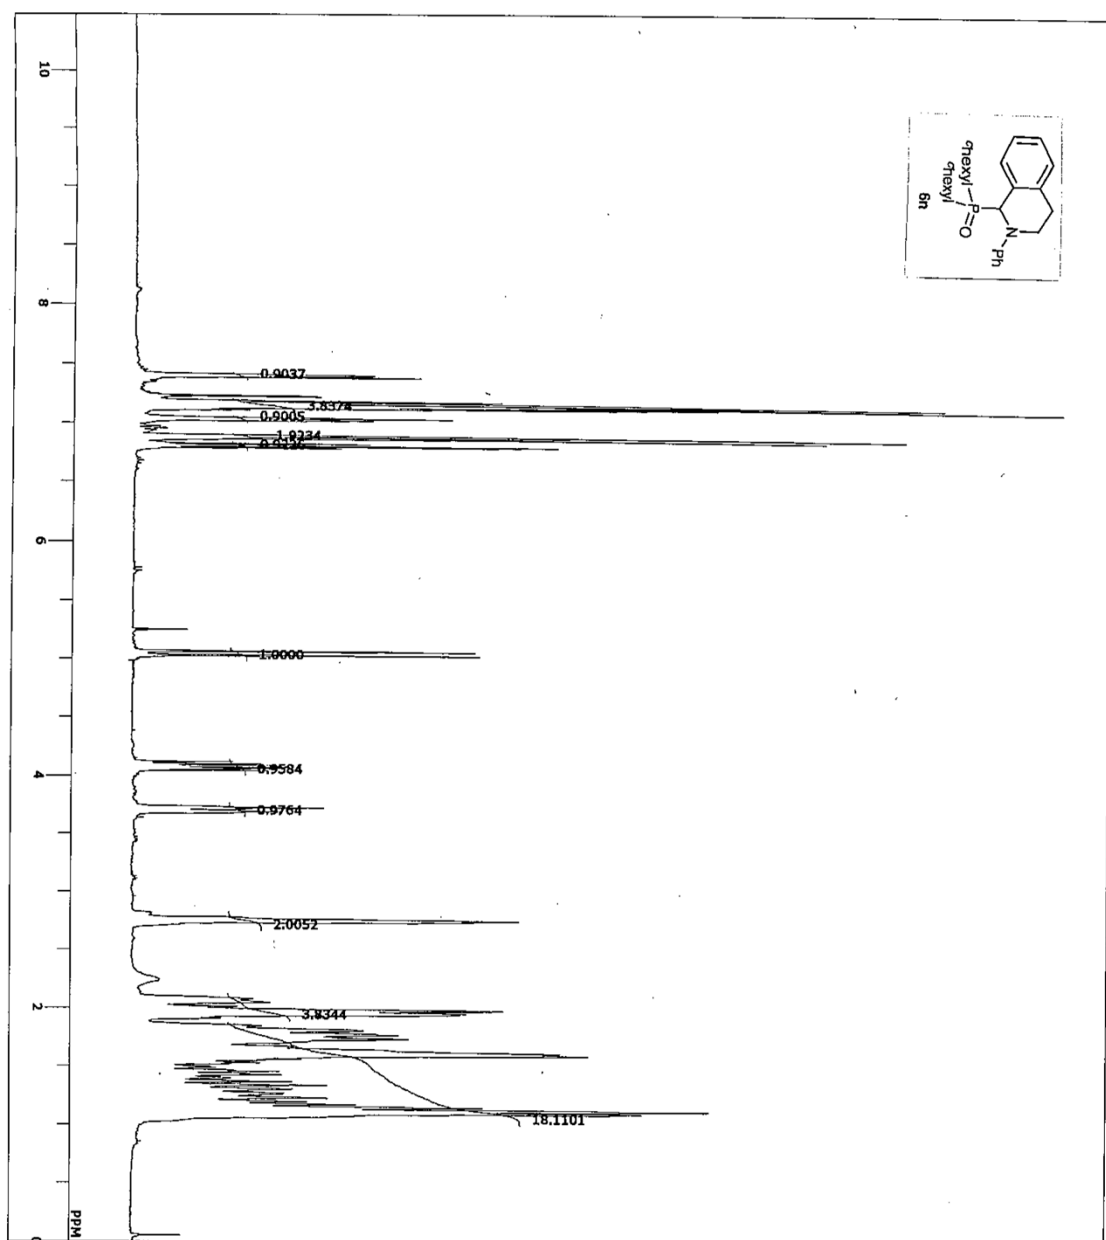

D:\Documents and Settings\Kobayashi\Desktop\WY-16  
 D:\Documents and Settings\Kobayashi\Desktop\WY-16  
 09-08-2013 10:08:58  
 1H  
 single\_pulse.ac2  
 399.78 MHz  
 4.19 KHz  
 7.29 Hz  
 16384  
 7505.00 Hz  
 2.1937 sec  
 2.0000 sec  
 6.50 urec  
 403.2 c  
 7.24 ppm  
 0.12 Hz  
 28  
 RGAIN

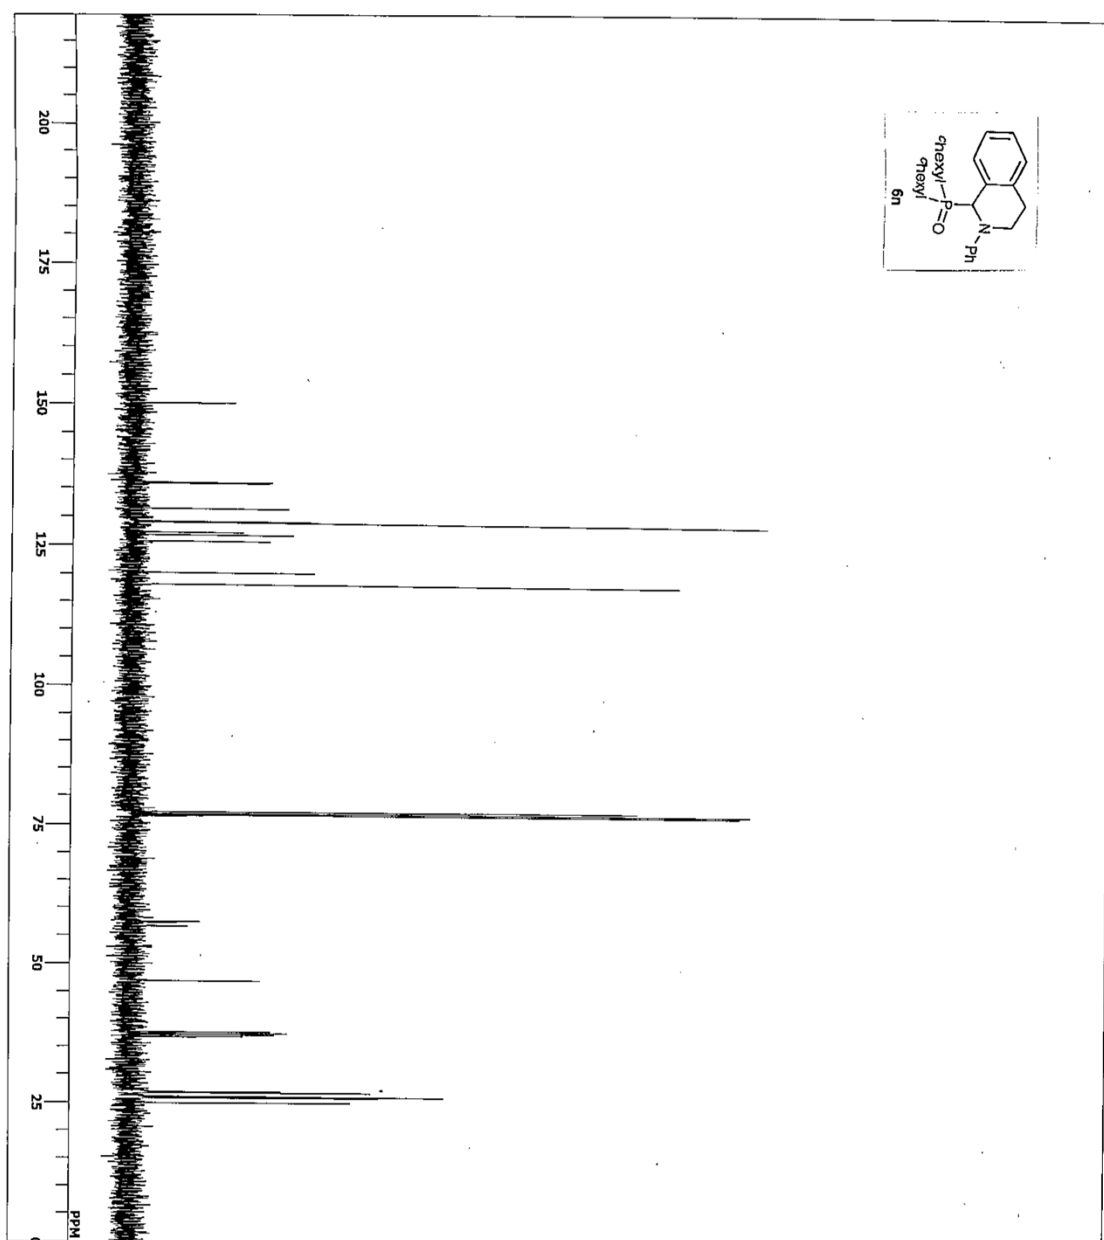

DFILE D:\Documents and Settings\Kobayashi\lab\Desktop\WY-16  
 COMMENT 09-08-2013 10:16:48  
 DATIM 13C  
 EXMOD single\_pulse\_dec  
 OBRFQ 100.53 MHz  
 OBSRT 5.35 KHz  
 OBTIN 5.86 Hz  
 POUTN 32768  
 PREQU 31407.03 Hz  
 SFASS 94  
 ACQTM 1.6433 sec  
 PD 2.000 sec  
 PUL 3.50 usec  
 IRNUC 1H 403.8 c  
 CTMP CDCL3  
 SLVNT 77.00 ppm  
 EXREF 0.12 Hz  
 BF 58  
 RGAIN 58



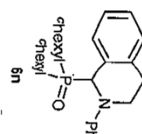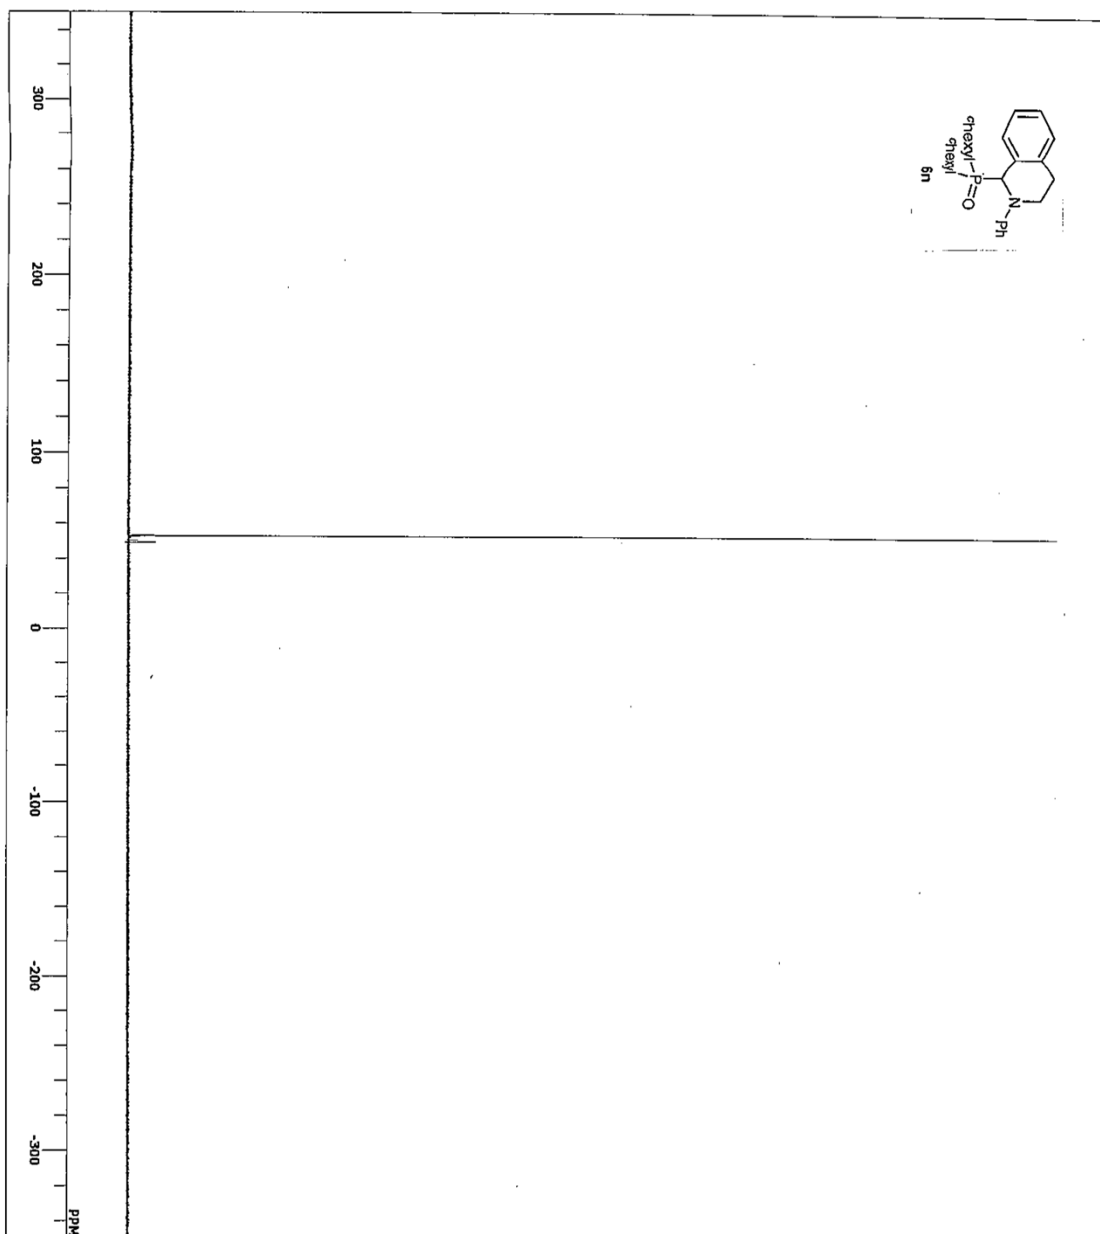

FILE D:\Documents and Settings\Kobayashi\lab\Desktop\WV-16  
 COMNT 09-08-2013 10:20:22  
 DATIN 31P  
 OBNUC single, pulse, dec  
 EKMOP 161.83 MHz  
 OFPRQ 4.69 kHz  
 OBSET 3.09 Hz  
 OBFIN 32768  
 POINT 142045.45 Hz  
 FREQU 28  
 SCANS  
 ACQTM 0.2307 sec  
 PD 2.0000 sec  
 PW1 5.80 usec  
 IRNUC 1H 404.1 c  
 CTEMP CDCL3 0.00 ppm  
 SILNT 0.42 Hz  
 EREF 54  
 RGAIN

### **Part III: References**

1. H. Mizuno, J. Takaya and N. Iwasawa, *J. Am. Chem. Soc.*, 2011, **133**, 1251.
2. F. Y. Kwong, A. Klapars and S. L. Buchwald, *Org. Lett.*, 2002, **4**, 581.
3. C. A. Busacca, J. C. Lorenz, N. Grinberg, N. Haddad, M. Hrapchak, B. Latli, H. Lee, P. Sabila, A. Saha, M. Sarvestani, S. Shen, R. Varsolona, X. Wei and C. H. Senanayake, *Org. Lett.*, 2005, **7**, 4277.
4. O. Baslé and C.-J. Li, *Chem. Commun.*, 2009, 4124.
5. J. Xie, H. Li, Q. Xue, Y. Cheng and C. Zhu, *Adv. Synth. Catal.*, 2012, **354**, 1646.
6. M. Rueping, S. Zhu and R. M. Koenigs, *Chem. Commun.*, 2011, **47**, 8679.
